# Supplementary material
Source: publisher figshare collection journal article supplement (https://gsapubs.figshare.com/ndownloader/files/23303747)
Supplement: Supplementary file 1 [file 23303747]

## SUPPLEMENTAL METHODS

### Grain size analysis

Two samples were taken from each push core (i) the 1 cm slice with the coarsest material and (ii) the 1 cm slice that visually appeared to contain the finest sediment. Grain-size analysis was conducted on a sub-sample of the 1 cm push core slices.

To ensure that the results of this study were directly comparable to those within Xu et al (2014), grain-size analysis was undertaken on the same Beckman Coulter LS230 laser diffraction particle size analyser, located at the USGS field office in Santa Cruz, California. Sample preparation also followed the same process used by Xu et al. (2014) and is outlined below.

Approximately 20 g of sediment was placed into individual 1000 mL beakers where 10 mL of 35% hydrogen peroxide ( $\text{H}_2\text{O}_2$ ) was added along with sufficient distilled (DI) water to make a 300 mL solution. This solution was left overnight in order to remove organics and begin the process of sample dispersion. The following day, the samples were placed onto a hotplate set at 250-300 °C for 2-3 hours, or until the solution was concentrated to 200 mL: this ensured that any hydrogen peroxide was removed. Following this, each beaker was placed into an ultrasonic bath for 10 minutes to continue the disaggregation of fine mud particles.

The removal of soluble salts required two runs in a centrifuge. Samples were transferred into 250 ml centrifuge bottles. The bottles were weighed and in pairs, topped up with deionized water to within 0.1 g of each other. Each bottle within a pair was placed opposite each other within the centrifuge to ensure it was correctly balanced. Samples were centrifuged initially for 1 hour at 1700 rpm. After this initial run, samples were removed and the supernate removed without losing sample before samples were re-weighed while adding deionized water for a second 30 minute run at 1700 rpm. Following this, each sample had 5 ml of sodiumhexametaphosphate (calgon) added to disperse negatively charged clay particles. To

26 ensure the weight of the calgon was accounted for, three aluminium trays were weighed before  
27 5 mL of calgon was added and left to dry overnight in the oven.

28 Wet sieving was used to separate the sand and silt (2000-63  $\mu\text{m}$ ) fraction from the fines  
29 and mud fraction ( $<63 \mu\text{m}$ ). Samples were washed: sand and silt sized grains were trapped in  
30 the sieve stack. Sand and silt were washed from the sieve and transferred into a crucible and  
31 then dried in an 80-110  $^{\circ}\text{C}$  oven overnight. Each graduated cylinder was topped up with  
32 deionized water to 1000 mL and left overnight.

33 The weight of each sample (both the dried sand and silt weight and the fines) was  
34 determined. The dry sand and silt were weighed and recorded. The dried weight of 20 mL of  
35 the fines solution was determined by drying the solution in an oven overnight and deducting  
36 the known weight of the calgon.

37 The Coulter counter was operated using the same protocol and parameters as described  
38 in Xu et al (2014). Approximately 1-2 g of sample was needed, with finer-grained samples  
39 requiring less sediment to achieve the correct obscuration. If the sample exceeded this 1-2 g  
40 guide, then it was split using a sand splitter before being added to the coulter chamber. Most  
41 samples were run using an obscuration of  $\sim 30\%$ . It was necessary to run some samples with  
42 an obscuration as low as 4%. For the fine samples, the sample was transferred to a beaker and  
43 agitated using a motorised stirrer in order to achieve a homogeneous suspension. After two  
44 minutes of stirring a sample was taken using a pipette and added into the Coulter chamber.  
45 Each sample was passed through the counter three times, although the first run was discarded,  
46 because air bubbles were often present. The second and third runs were compared and if  
47 similar, then results were averaged. Between each run, the system was flushed to ensure no  
48 residual grains from the previous sample remained in the system. The coarse and fine samples,  
49 from a single grain-size sample (i.e. one push core slice), were combined using the bespoke  
50 USGS software, pc SDSZ, at the end of each run.



51

## 52 **<sup>210</sup>Pb dating**

53 Sediment accumulation rates and ages were constrained by analysing for unsupported  
54 (excess) <sup>210</sup>Pb. <sup>210</sup>Pb is a naturally occurring radionuclide of the <sup>238</sup>U radioactive decay chain.  
55 Supported <sup>210</sup>Pb is derived from its parent radionuclide, <sup>226</sup>Ra ( $t_{1/2}$  = 1600 years), within the  
56 sediment and is in secular equilibrium with its precursors in the <sup>238</sup>U decay series. In contrast,  
57 unsupported <sup>210</sup>Pb is formed by the decay of atmospheric <sup>222</sup>Rn ( $t_{1/2}$  = 3.8 days) and  
58 accumulates in sediments through adsorption on suspended particulates (Swarzenski, 2014).  
59 <sup>210</sup>Pb has a half-life of 22.3 years and can therefore be used to establish sediment accumulation  
60 rates over the past 100 – 150 years.

61 The <sup>210</sup>Pb activity of samples was measured using gamma spectrometry at the USGS  
62 laboratories in Menlo Park, California. A 1 cm slice from the highest altitude push core (~70 m  
63 altitude) at each transect was used for the <sup>210</sup>Pb analysis. In the laboratory the samples were  
64 dried in an oven at 55°C over five days. The samples were weighed before and after drying to  
65 determine wet and dry sample weight, and sample porosity. Each dried sample was pulverized  
66 by hand using a ceramic mortar and pestle. The resulting powdered-sediment was transferred to  
67 a scintillation vial and sealed, with the mass also noted.

68 1 or 2 centimeter intervals of sediment were counted in a calibrated high-purity Ge  
69 well-type gamma detector using the 46.52 keV (<sup>210</sup>Pb), 351.87 and 609.31 keV (<sup>226</sup>Ra) and the  
70 661.6 keV (<sup>137</sup>Cs) gamma energies. Precision in the activities of <sup>210</sup>Pb, <sup>226</sup>Ra, and <sup>137</sup>Cs were  
71 better than 5%. Excess <sup>210</sup>Pb derived geochronologies were calculated by deriving the  
72 inventories (I) of <sup>210</sup>Pb<sub>xs</sub>, <sup>137</sup>Cs, and <sup>226</sup>Ra using the following relationship:

73

74 
$$I \text{ (dpm.cm}^{-2}\text{)} = A_n \times M$$

75

where  $M$  is the cumulative mass (sum of mass depth in each layer) for each depth interval ( $\text{g cm}^{-2}$ ), and  $A_n$  is the activity of each nuclide (i.e.,  $^{210}\text{Pb}_{\text{xs}}$ ,  $^{137}\text{Cs}$ , or  $^{226}\text{Ra}$ ) per cumulative mass. The cumulative mass was calculated by adding the mass from each layer equivalent to the mass depth. Further details of these methods can be found in Swarzenski et al., 2006.

As several samples were taken at different depths within a core, sedimentation rates were calculated using a constant rate of supply method (Appleby and Oldfield, 1978), and is defined by:

$$C_d = C_0 e^{-kt}$$

Where  $C_d$  is the activity of  $^{210}\text{Pb}$  at depth  $d$ ,  $C_0$  is the activity of  $^{210}\text{Pb}$  at the core top (i.e. initial concentration of unsupported  $^{210}\text{Pb}$ ),  $k$  is the decay constant for  $^{210}\text{Pb}$  (0.031), and  $t$  is the sedimentation rate. Least squares regression was used to establish the sedimentation rate of  $\text{Ln}(^{210}\text{Pb}_{\text{excess}})$  as a function of depth.

## SUPPLEMENTAL DISCUSSION

### Flow thickness

We state that the three turbidity currents sourced in Monterey Canyon had a thin flow front that thickened through time. This conclusion is despite the final turbidity current not being captured at the shallowest mooring (R1) as a result of it breaking the mooring. We infer that the final turbidity current had a thin flow front because of the similarities in maximum velocities and thickness evolution between the three turbidity currents at deeper moorings. Additionally, the tilting and movement of the shallowest mooring by the second turbidity current happened during an initial high velocity phase of the turbidity current. It is not

unreasonable to attribute the breaking of the mooring by the final turbidity current to a similar high velocity phase and thus a similar flow structure to previous turbidity currents.

**SUPPLEMENTAL REFERENCES**

Appleby, P.G., and Oldfield, F., 1978, The calculation of lead-210 dates assuming a constant rate of supply of unsupported  $^{210}\text{Pb}$  to the sediment: *Catena*, v.5, p.1-8, doi:10.1016/S0341-8162(78)80002-2

Swarzenski, P. W., Baskaran, M., Rosenbauer, R. J., and Orem, W. H., 2006, Historical trace element distribution in sediments from the Mississippi River delta: *Estuaries and Coasts*, v. 29, p. 1094–1107, doi: 10.1007/BF02781812

Swarzenski, P. W. 2014,  $^{210}\text{Pb}$  dating, *in* Rink, W.J., and Thompson, J., eds., *Encyclopedia of Scientific Dating Methods*, Springer-Verlag, Berlin, p. 626-632, doi:10.1007/978-94-007-6326-5\_236-1

**SUPPLEMENTAL FIGURE AND TABLE CAPTIONS**

Fig. DR1: Pressure, temperature, and schematic plots to highlight the translation and tilt of mooring R1 (original data presented in Xu et al., 2014). A) Pressure measurements at 170 (red) and 300 (blue) meters above seafloor. The increase in pressure signifies the onset of the turbidity current. The 20-minute measurement resolution of the pressure sensor means that the tilt is not record with these instruments (tilt lasts for  $\leq 15$  minutes) but the translation downslope, which occurs within 20-minutes, is highlighted by the pressure remaining at an elevated level. An  $\sim 18.4$  dbar increase equates to  $\sim 18$  m water depth increase. With an average slope of  $1.8^\circ$  and an 18 m depth increase, this equates to the mooring having travelled  $\sim 180$  m down-canyon. B) Temperature plots at 170 (red) and 300 (blue) meters above seafloor. The temperature drop between 00 and 01 highlights the length and amount of mooring tilt. The 300 m temperature sensor drops to measure levels of the 170 m sensor indicates the amount of tilt on the mooring. The measurements are taken every five minutes. Three intervals during the temperature drop suggest the mooring was tilted for up to 15 minutes. The enlarged panels shows that the amount of tilt is the minimum amount of tilt. The mooring could have tilted more (dashed line) but not be recorded as the sensors only record every five minutes. C) Schematic representation of the mooring tilt. The 300 m sensors (blue) tilts to the level of the 170 m sensors (red). At the level of the sediment trap (70 meters), this tilt equates to 36.8 m depth increase. During this tilting the mooring is also translating down canyon.

Fig. DR2: Graphical logs and photos of three facies collected from Monterey Canyon. The *chaotic sand and gravel* could not be recovered as a complete core and is therefore not included.

152 Fig. DR3: Excess down-core  $^{210}\text{Pb}$  ( $x\text{s}^{210}\text{Pb}$ ) in disintegrations per minute (dpm). Each plot  
153 represents a different 70 m altitude core at a different transect (Tr1-6). Summary parameters  
154 of the linear regression (equation,  $r^2$  value and sedimentation rate) are included on each plot.

155

156 Fig. DR4-DR9: Across canyon transects (looking down-canyon) at each transect location with  
157 each push core location and core photo. The different colors of the core photos may relate to  
158 different lighting of the photos or different cameras used. The contrast and brightness of the  
159 photos have been adjusted to highlight features.

160

161 Table DR1: Detailed push core locations including transect associations and altitude.

162

163 Table DR2: Detailed USGS mooring locations including water depth (Xu et al., 2004).

164

165 Table DR3: Characteristics of the four monitored turbidity currents (Xu et al., 2004; Xu 2010).

166 Flow thicknesses were calculated from the ADCP velocity profiles (for methods see Xu, 2010).



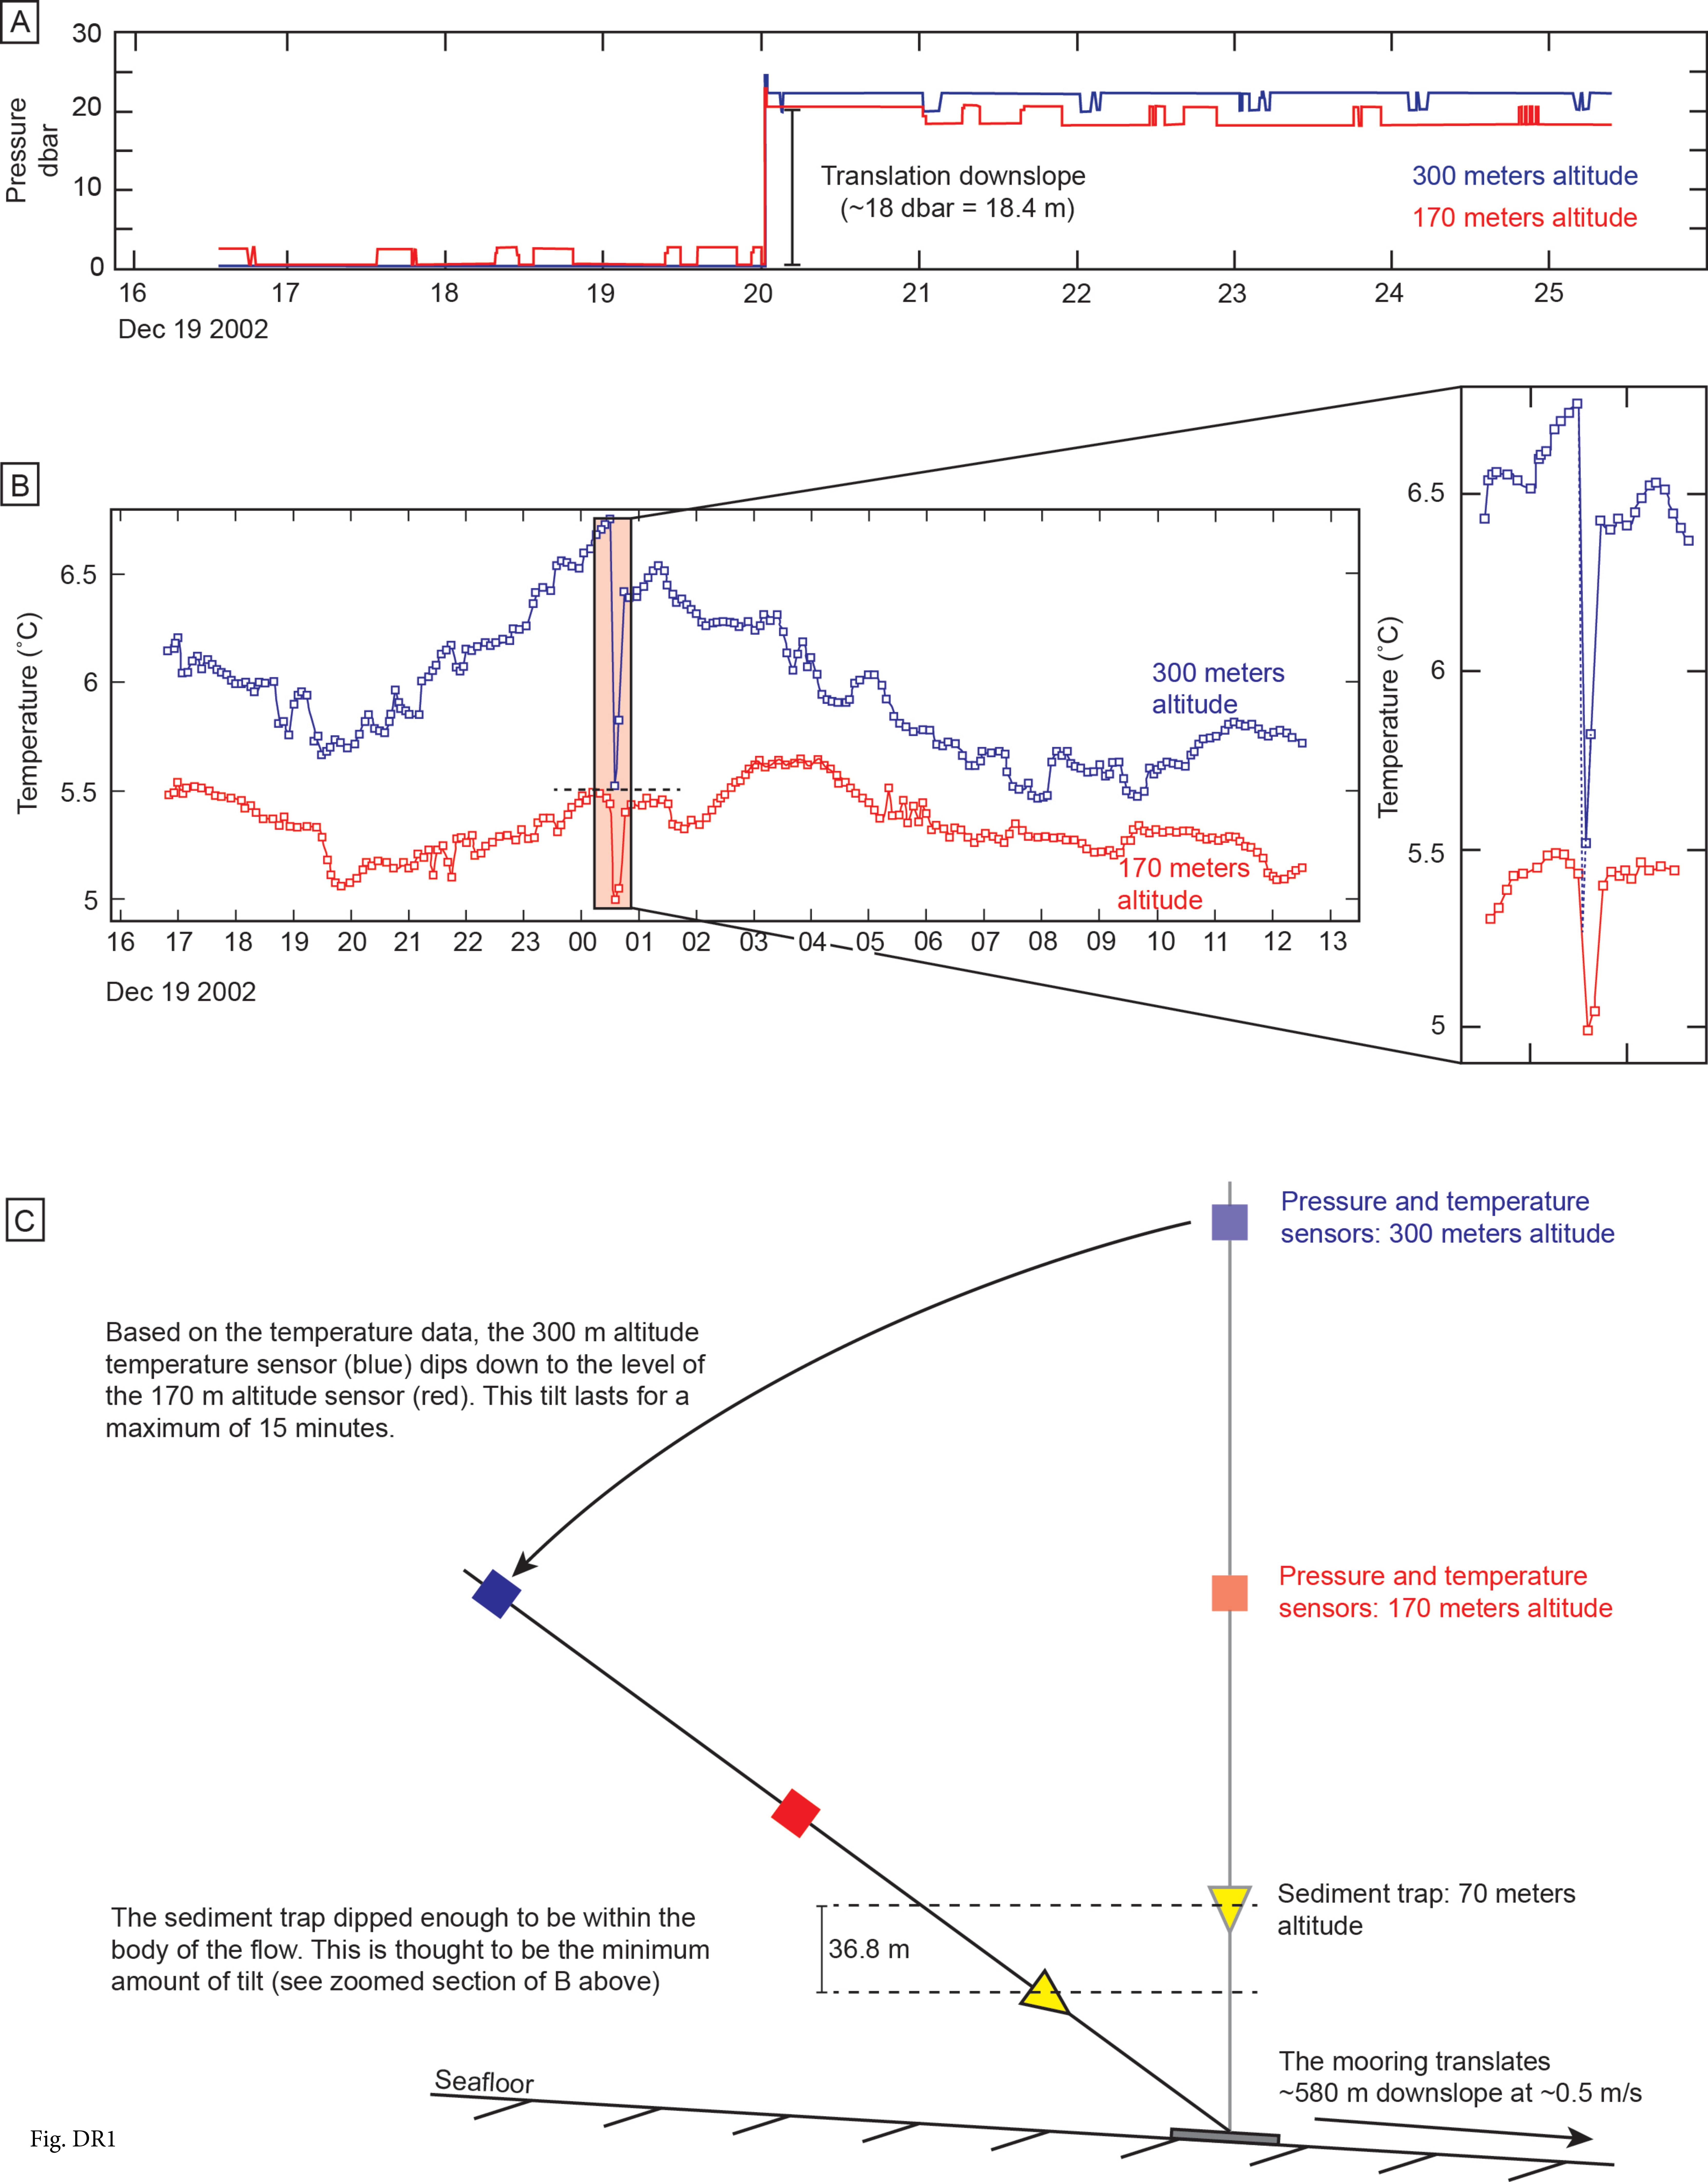

Fig. DR1



### A. Clean sands

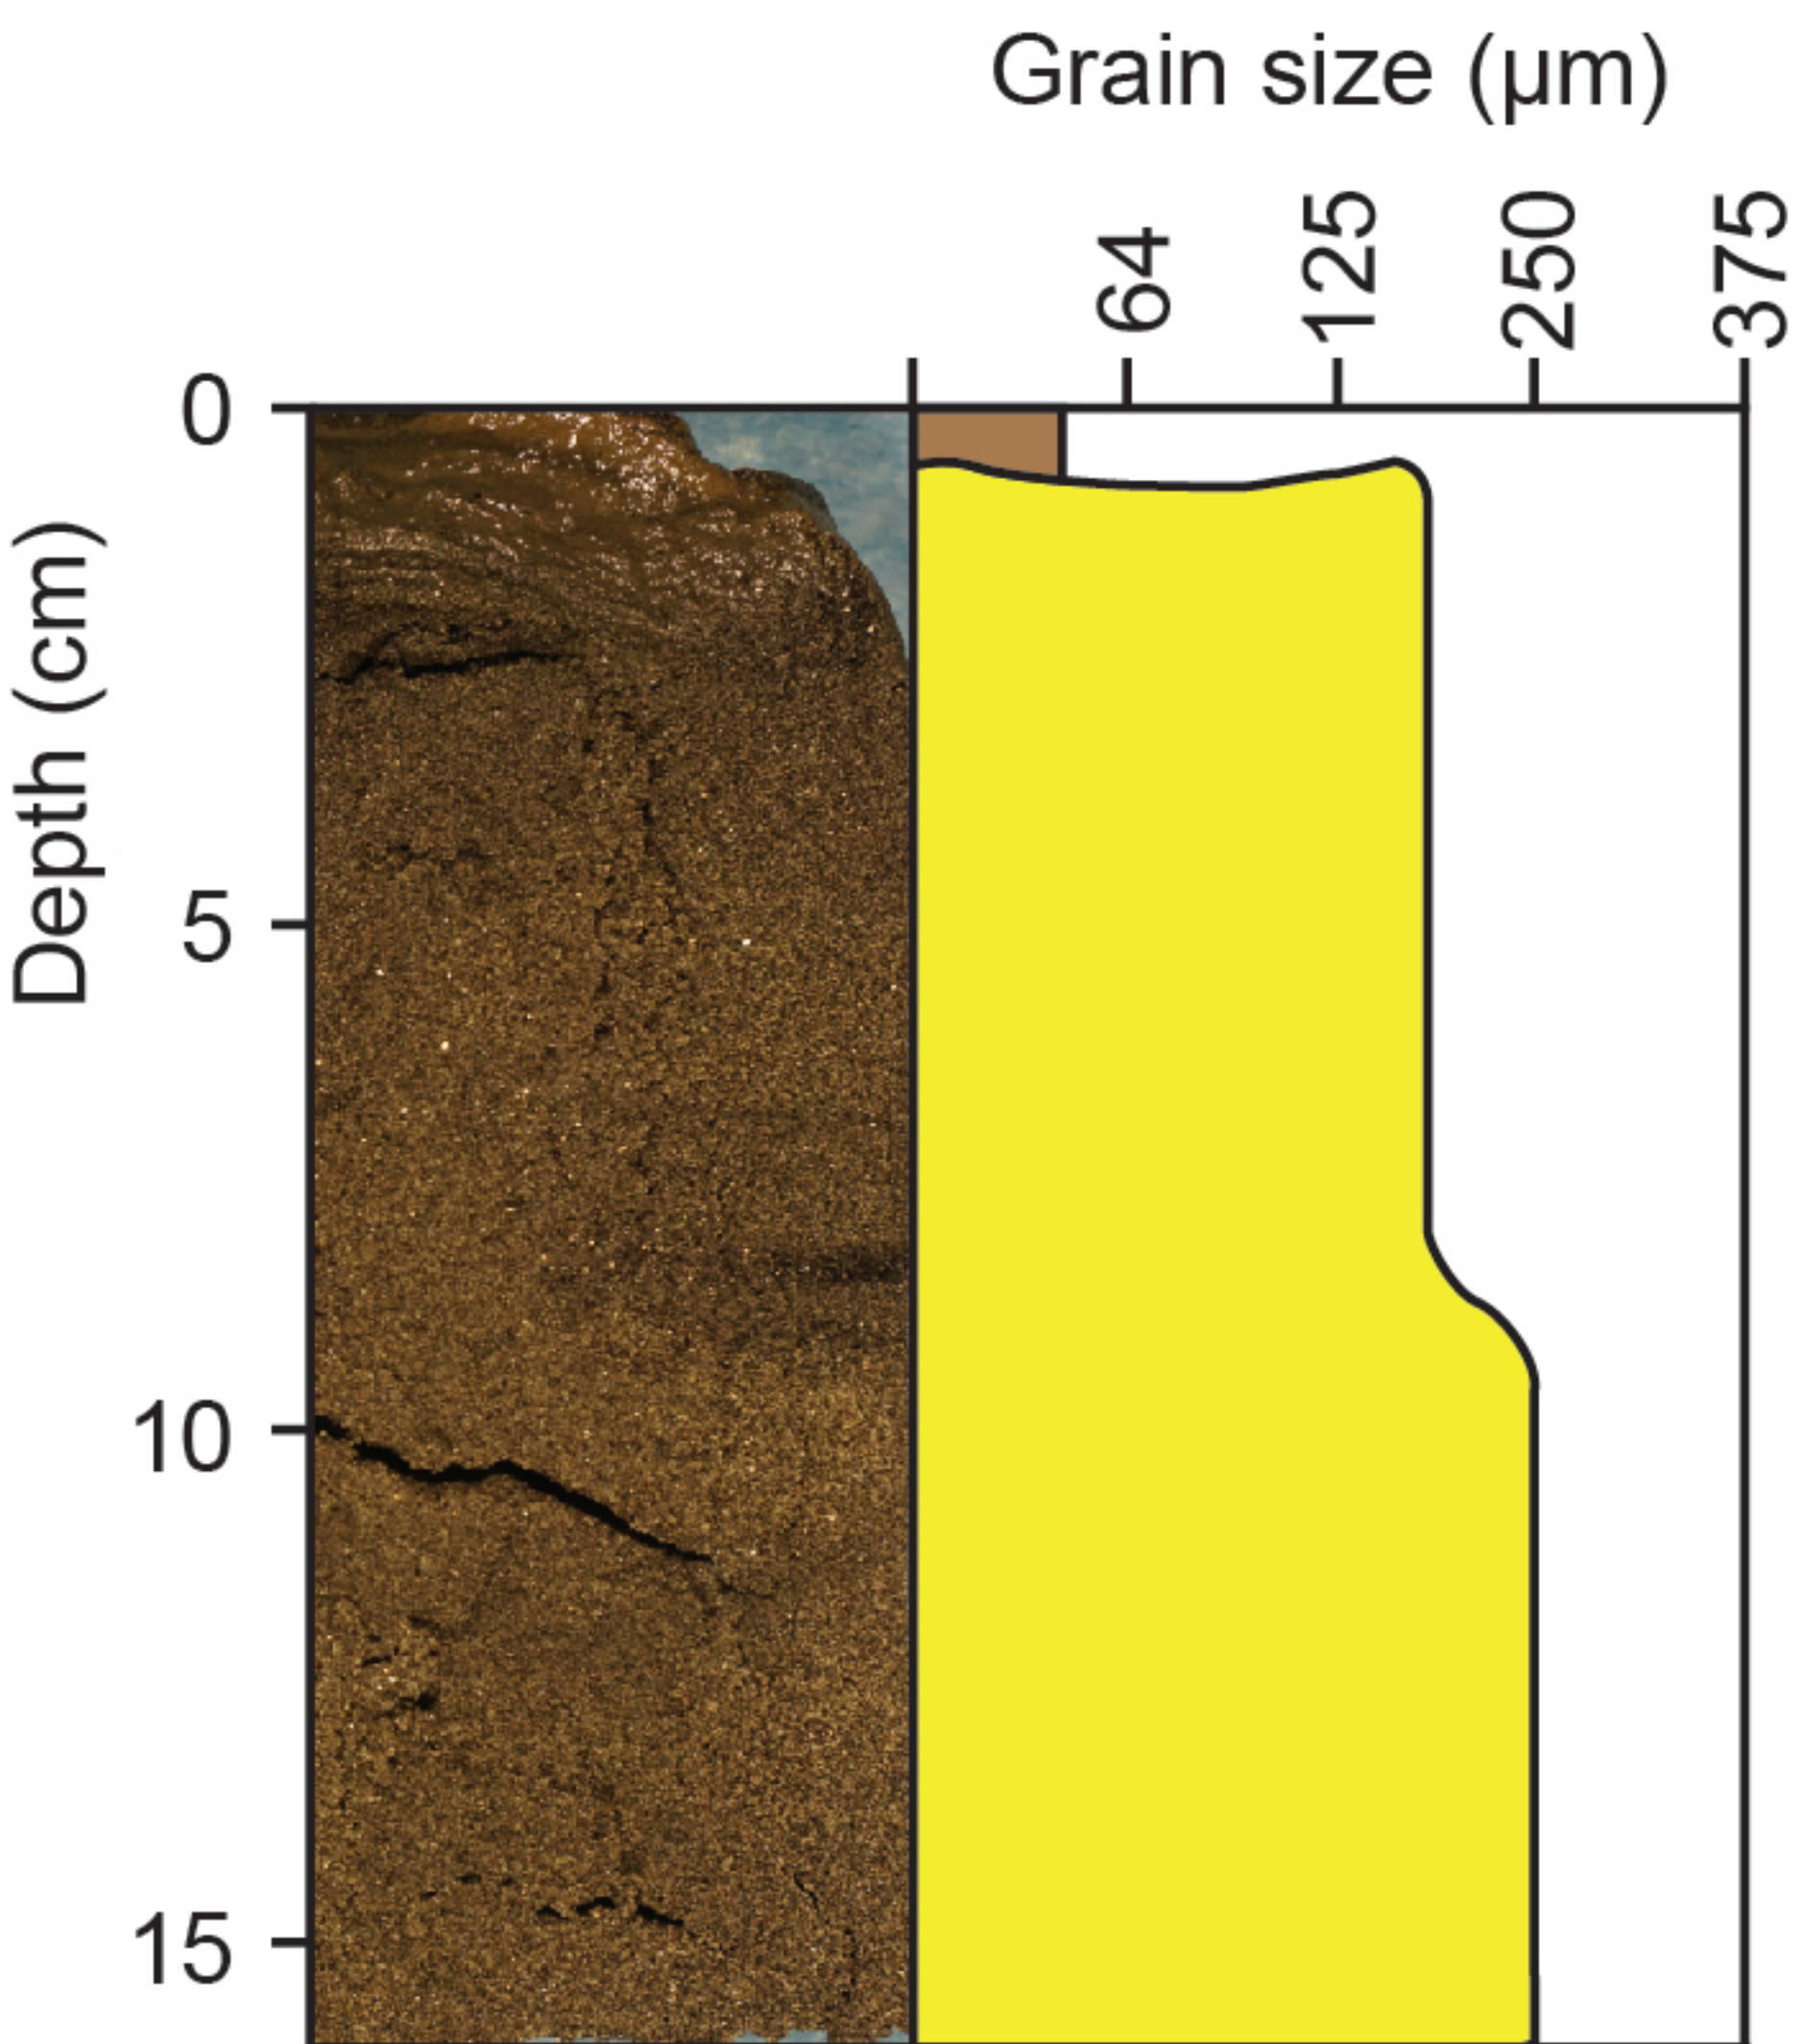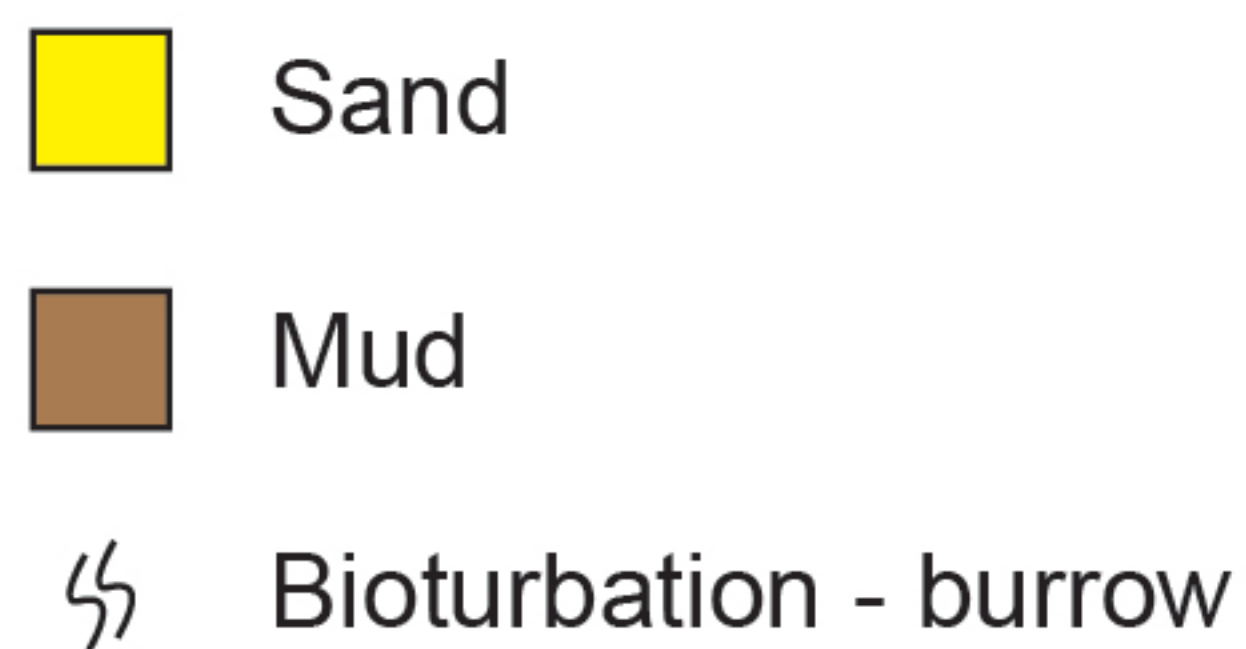

### B. Interbedded sands and silty mud

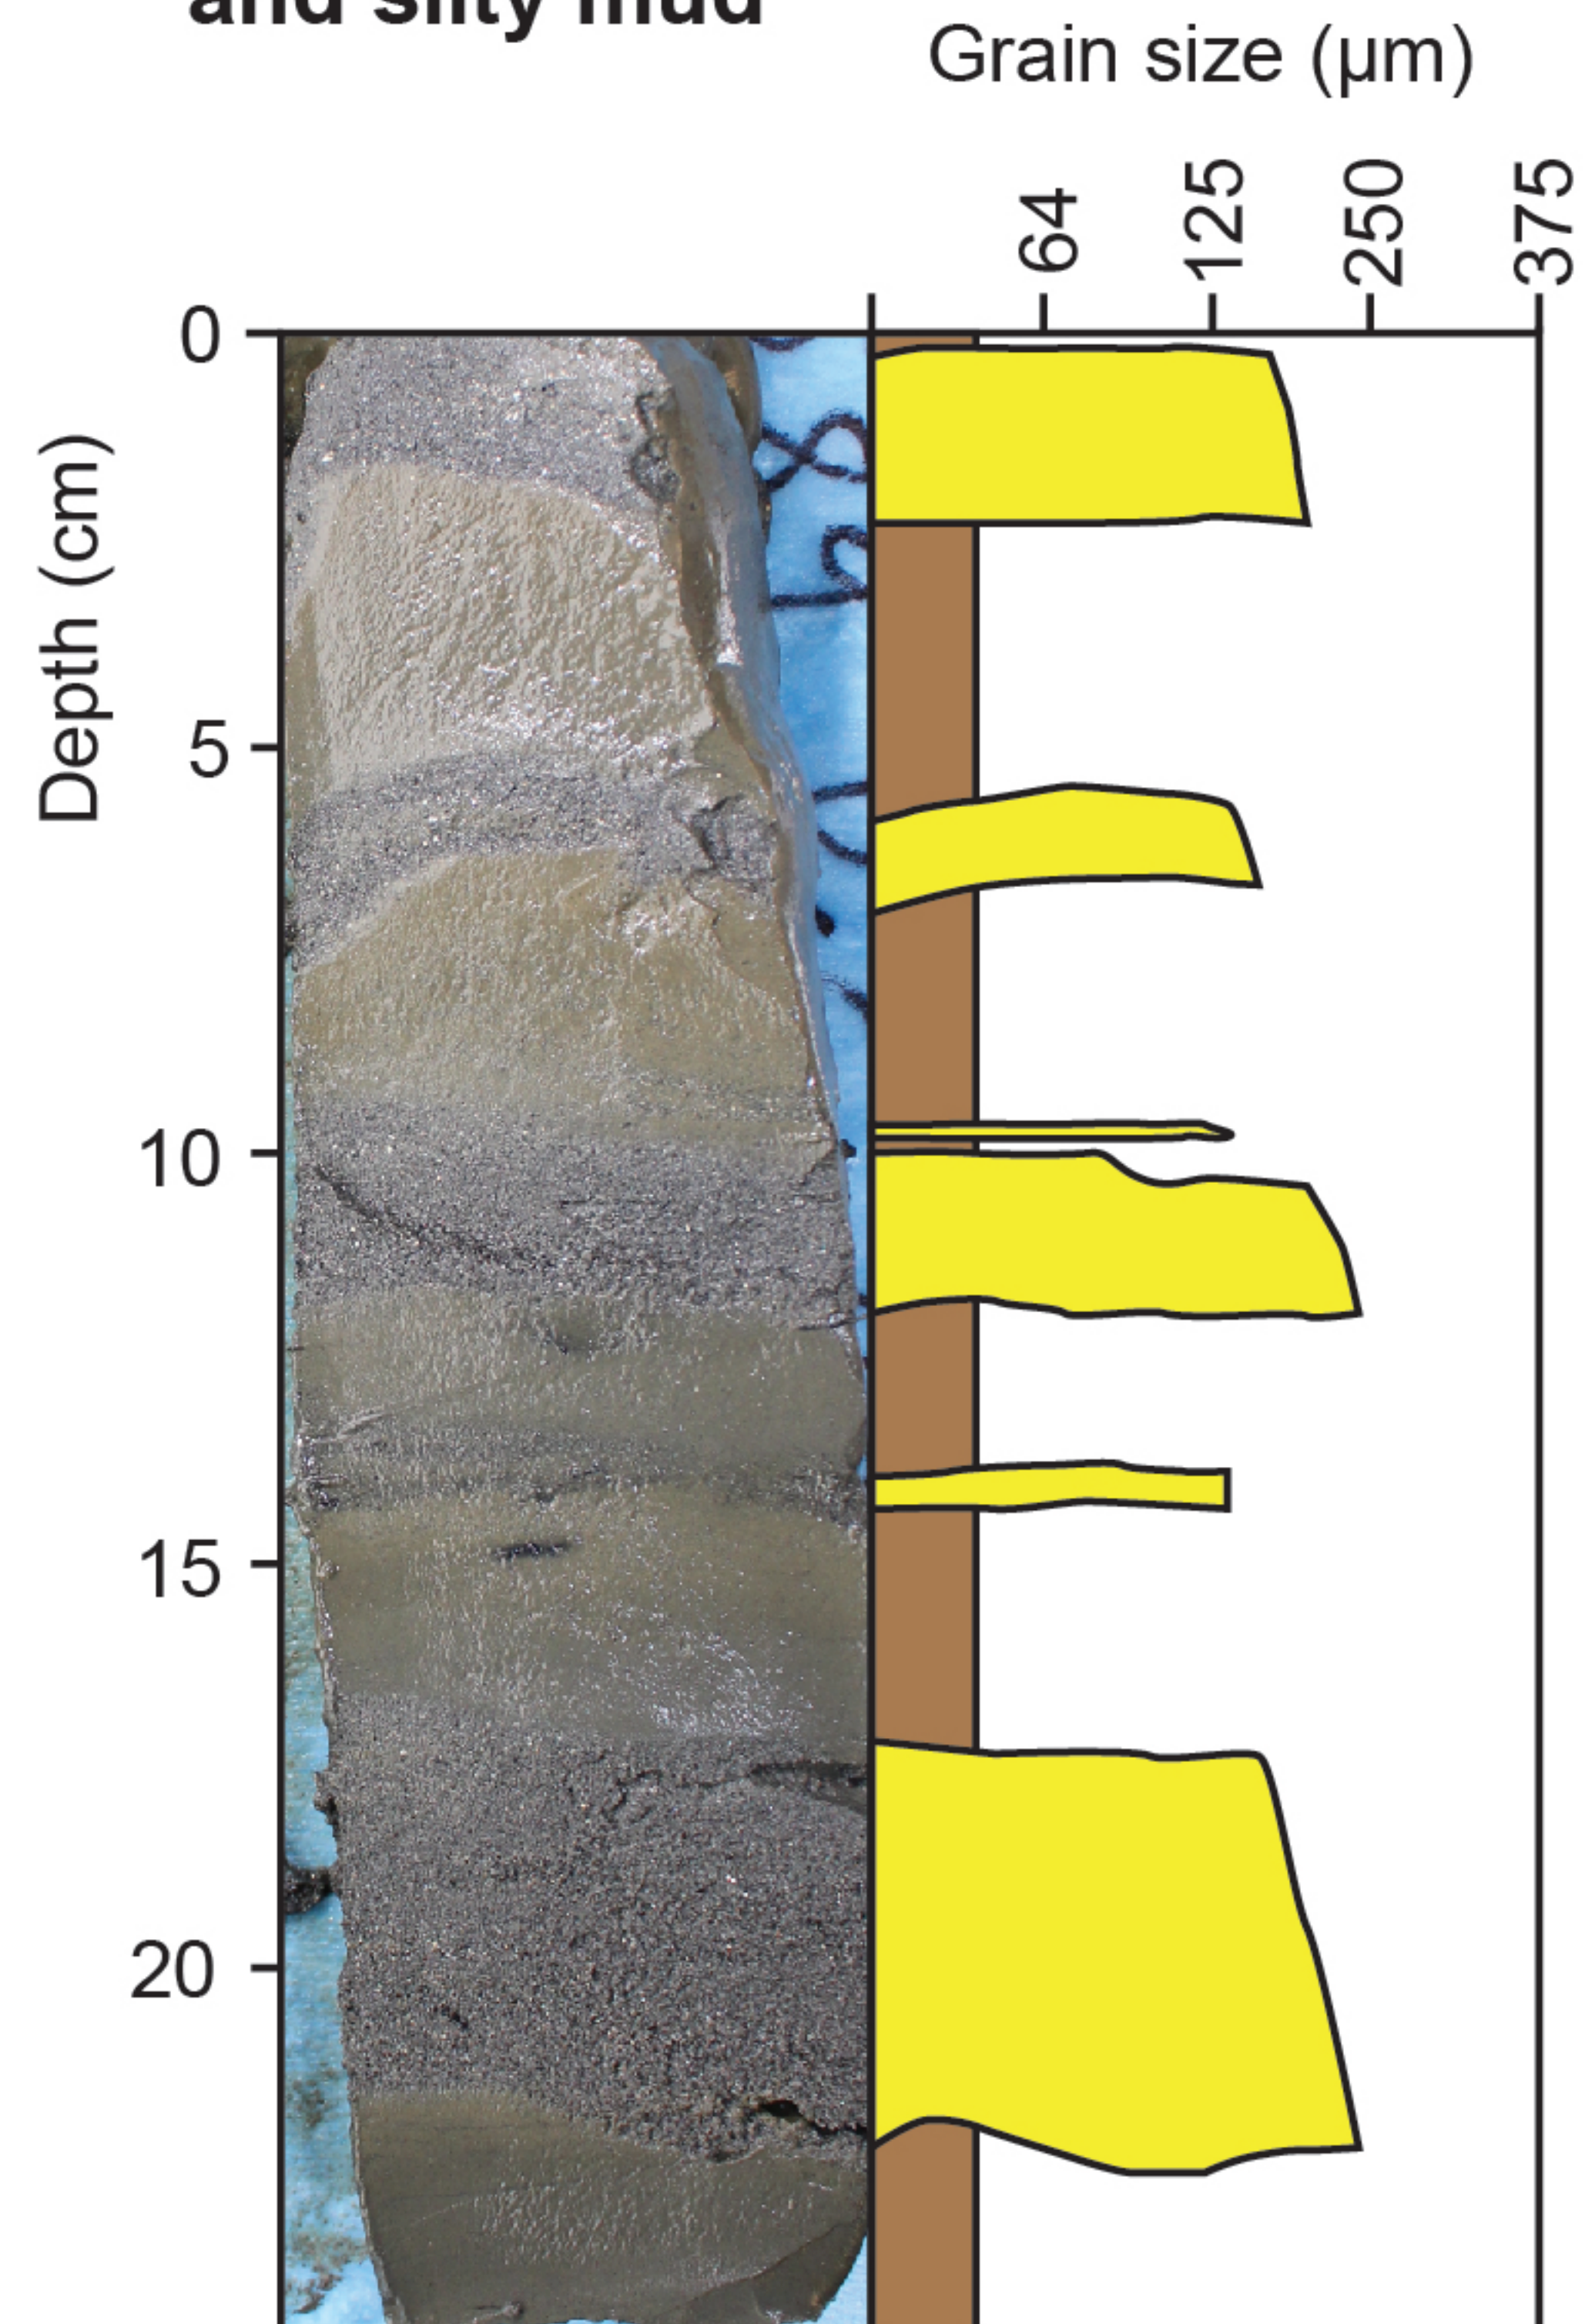

### C. Silty mud

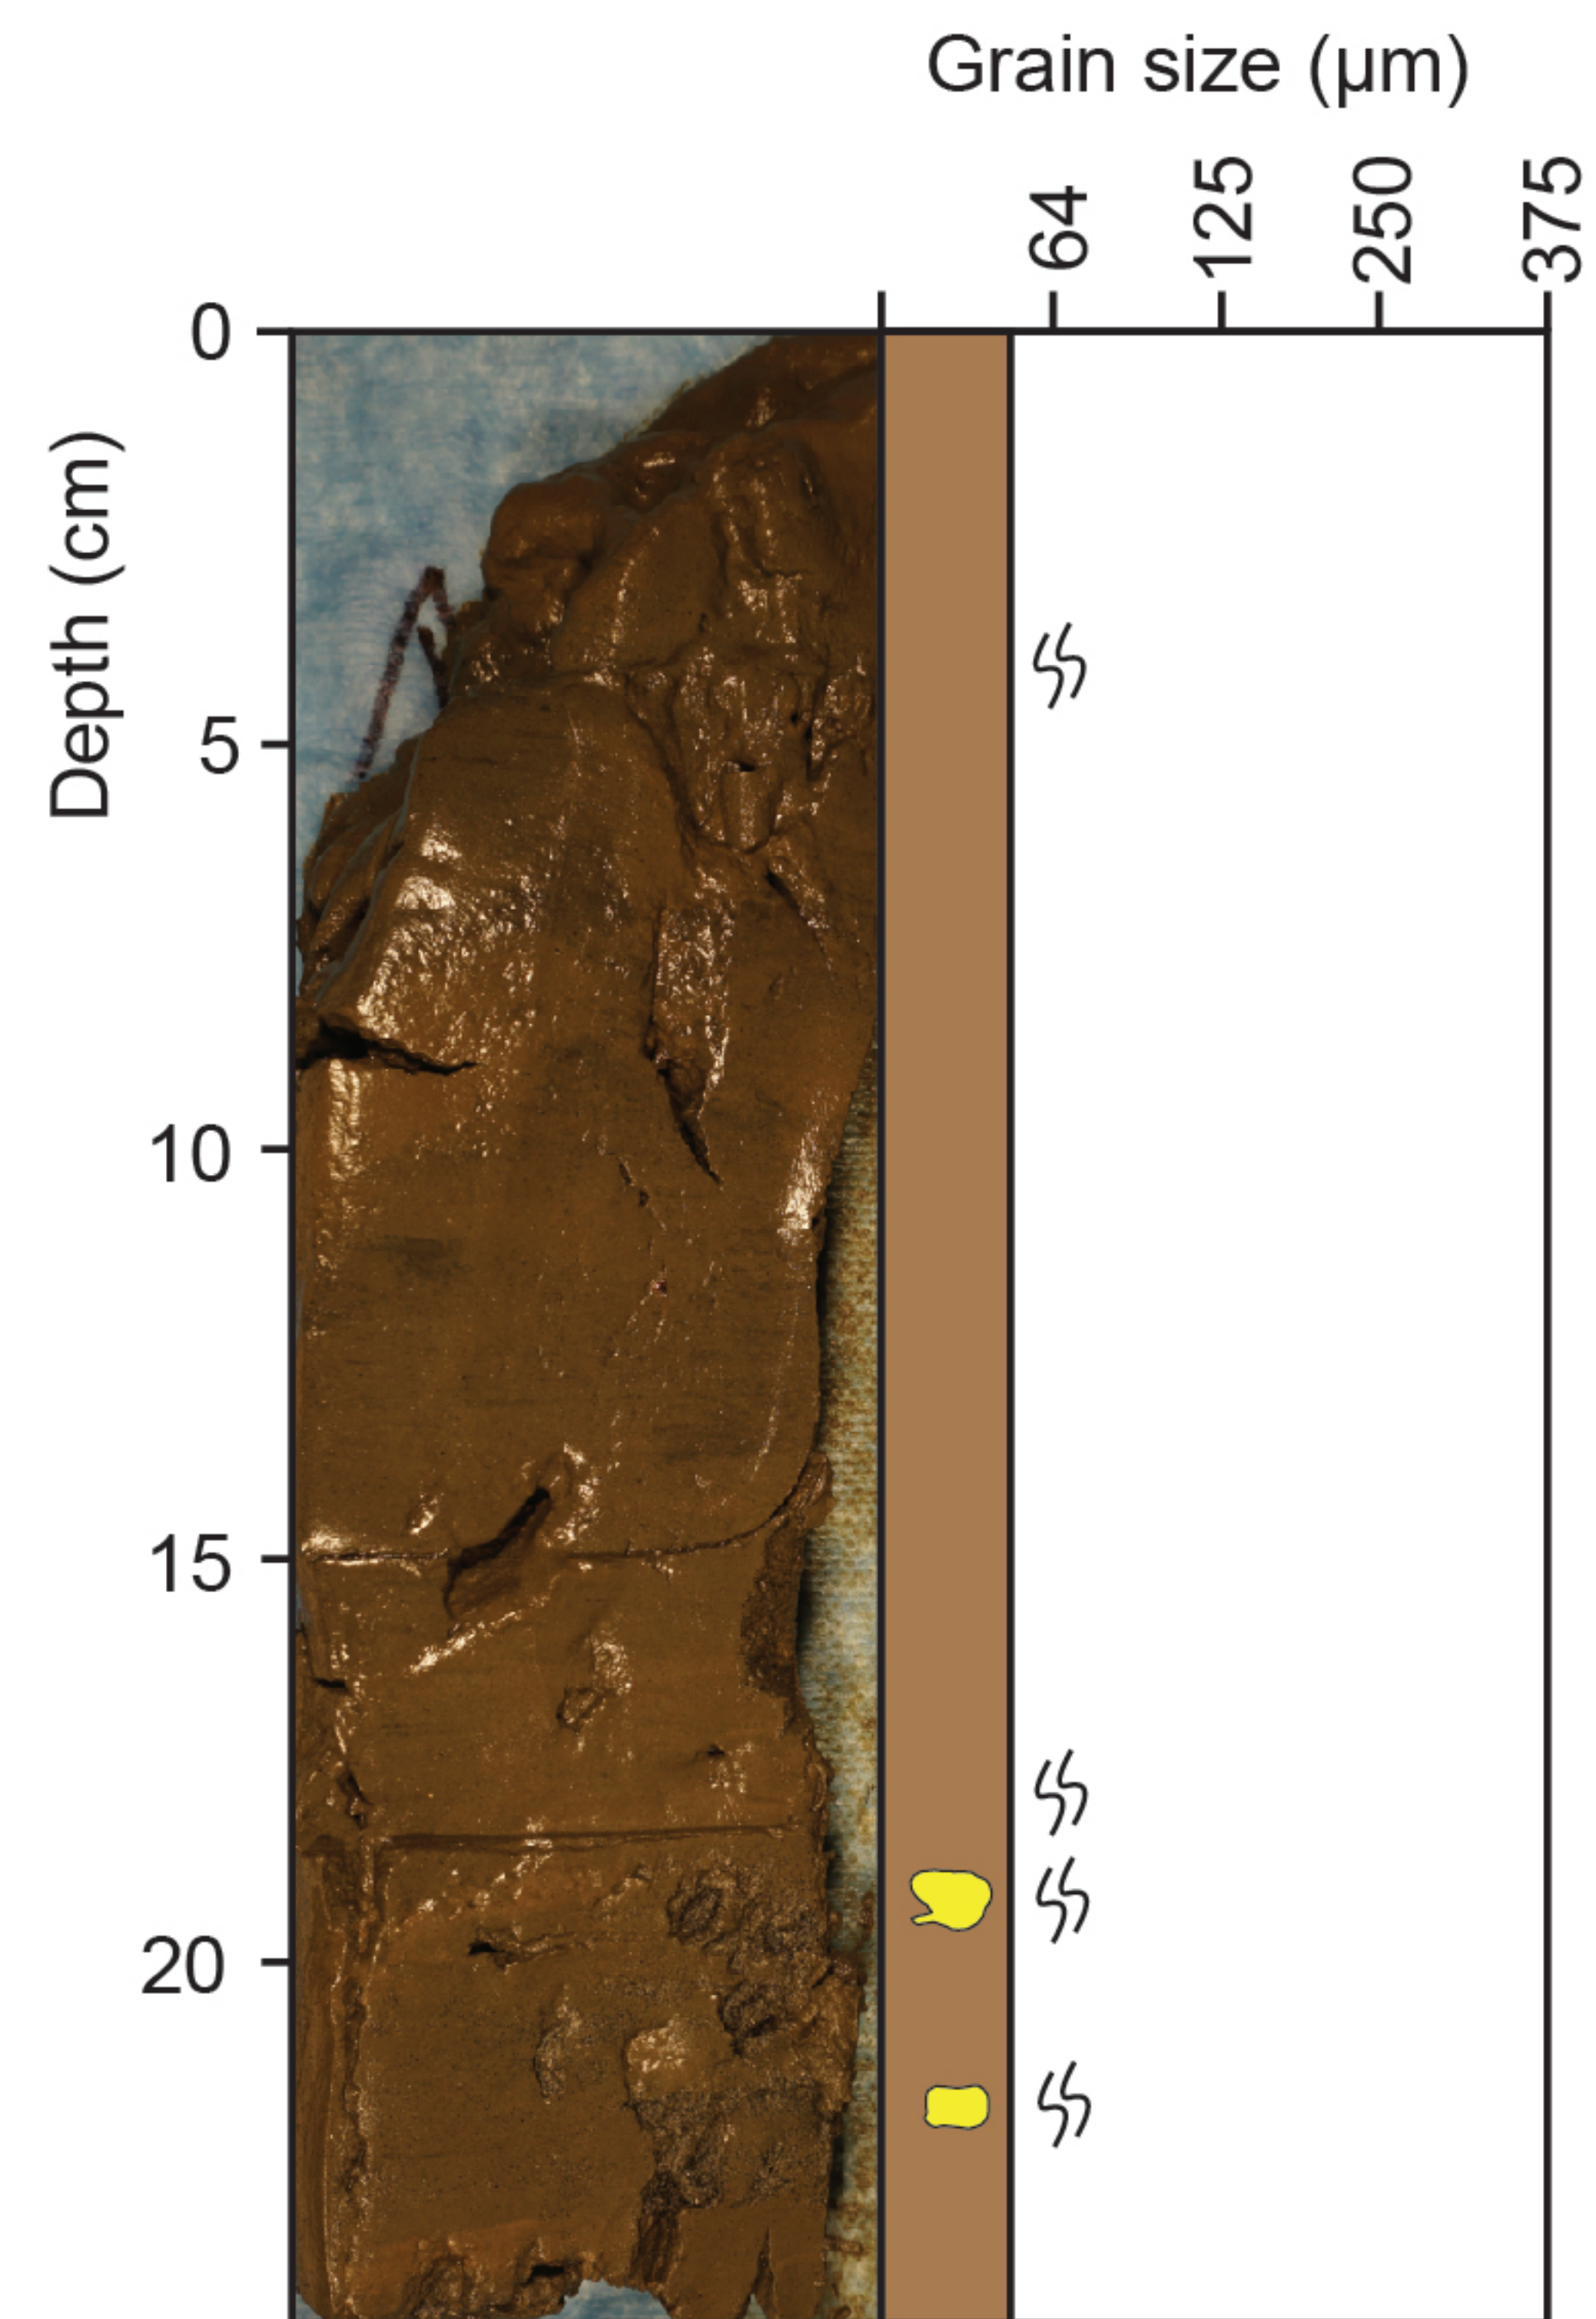



Fig. DR3

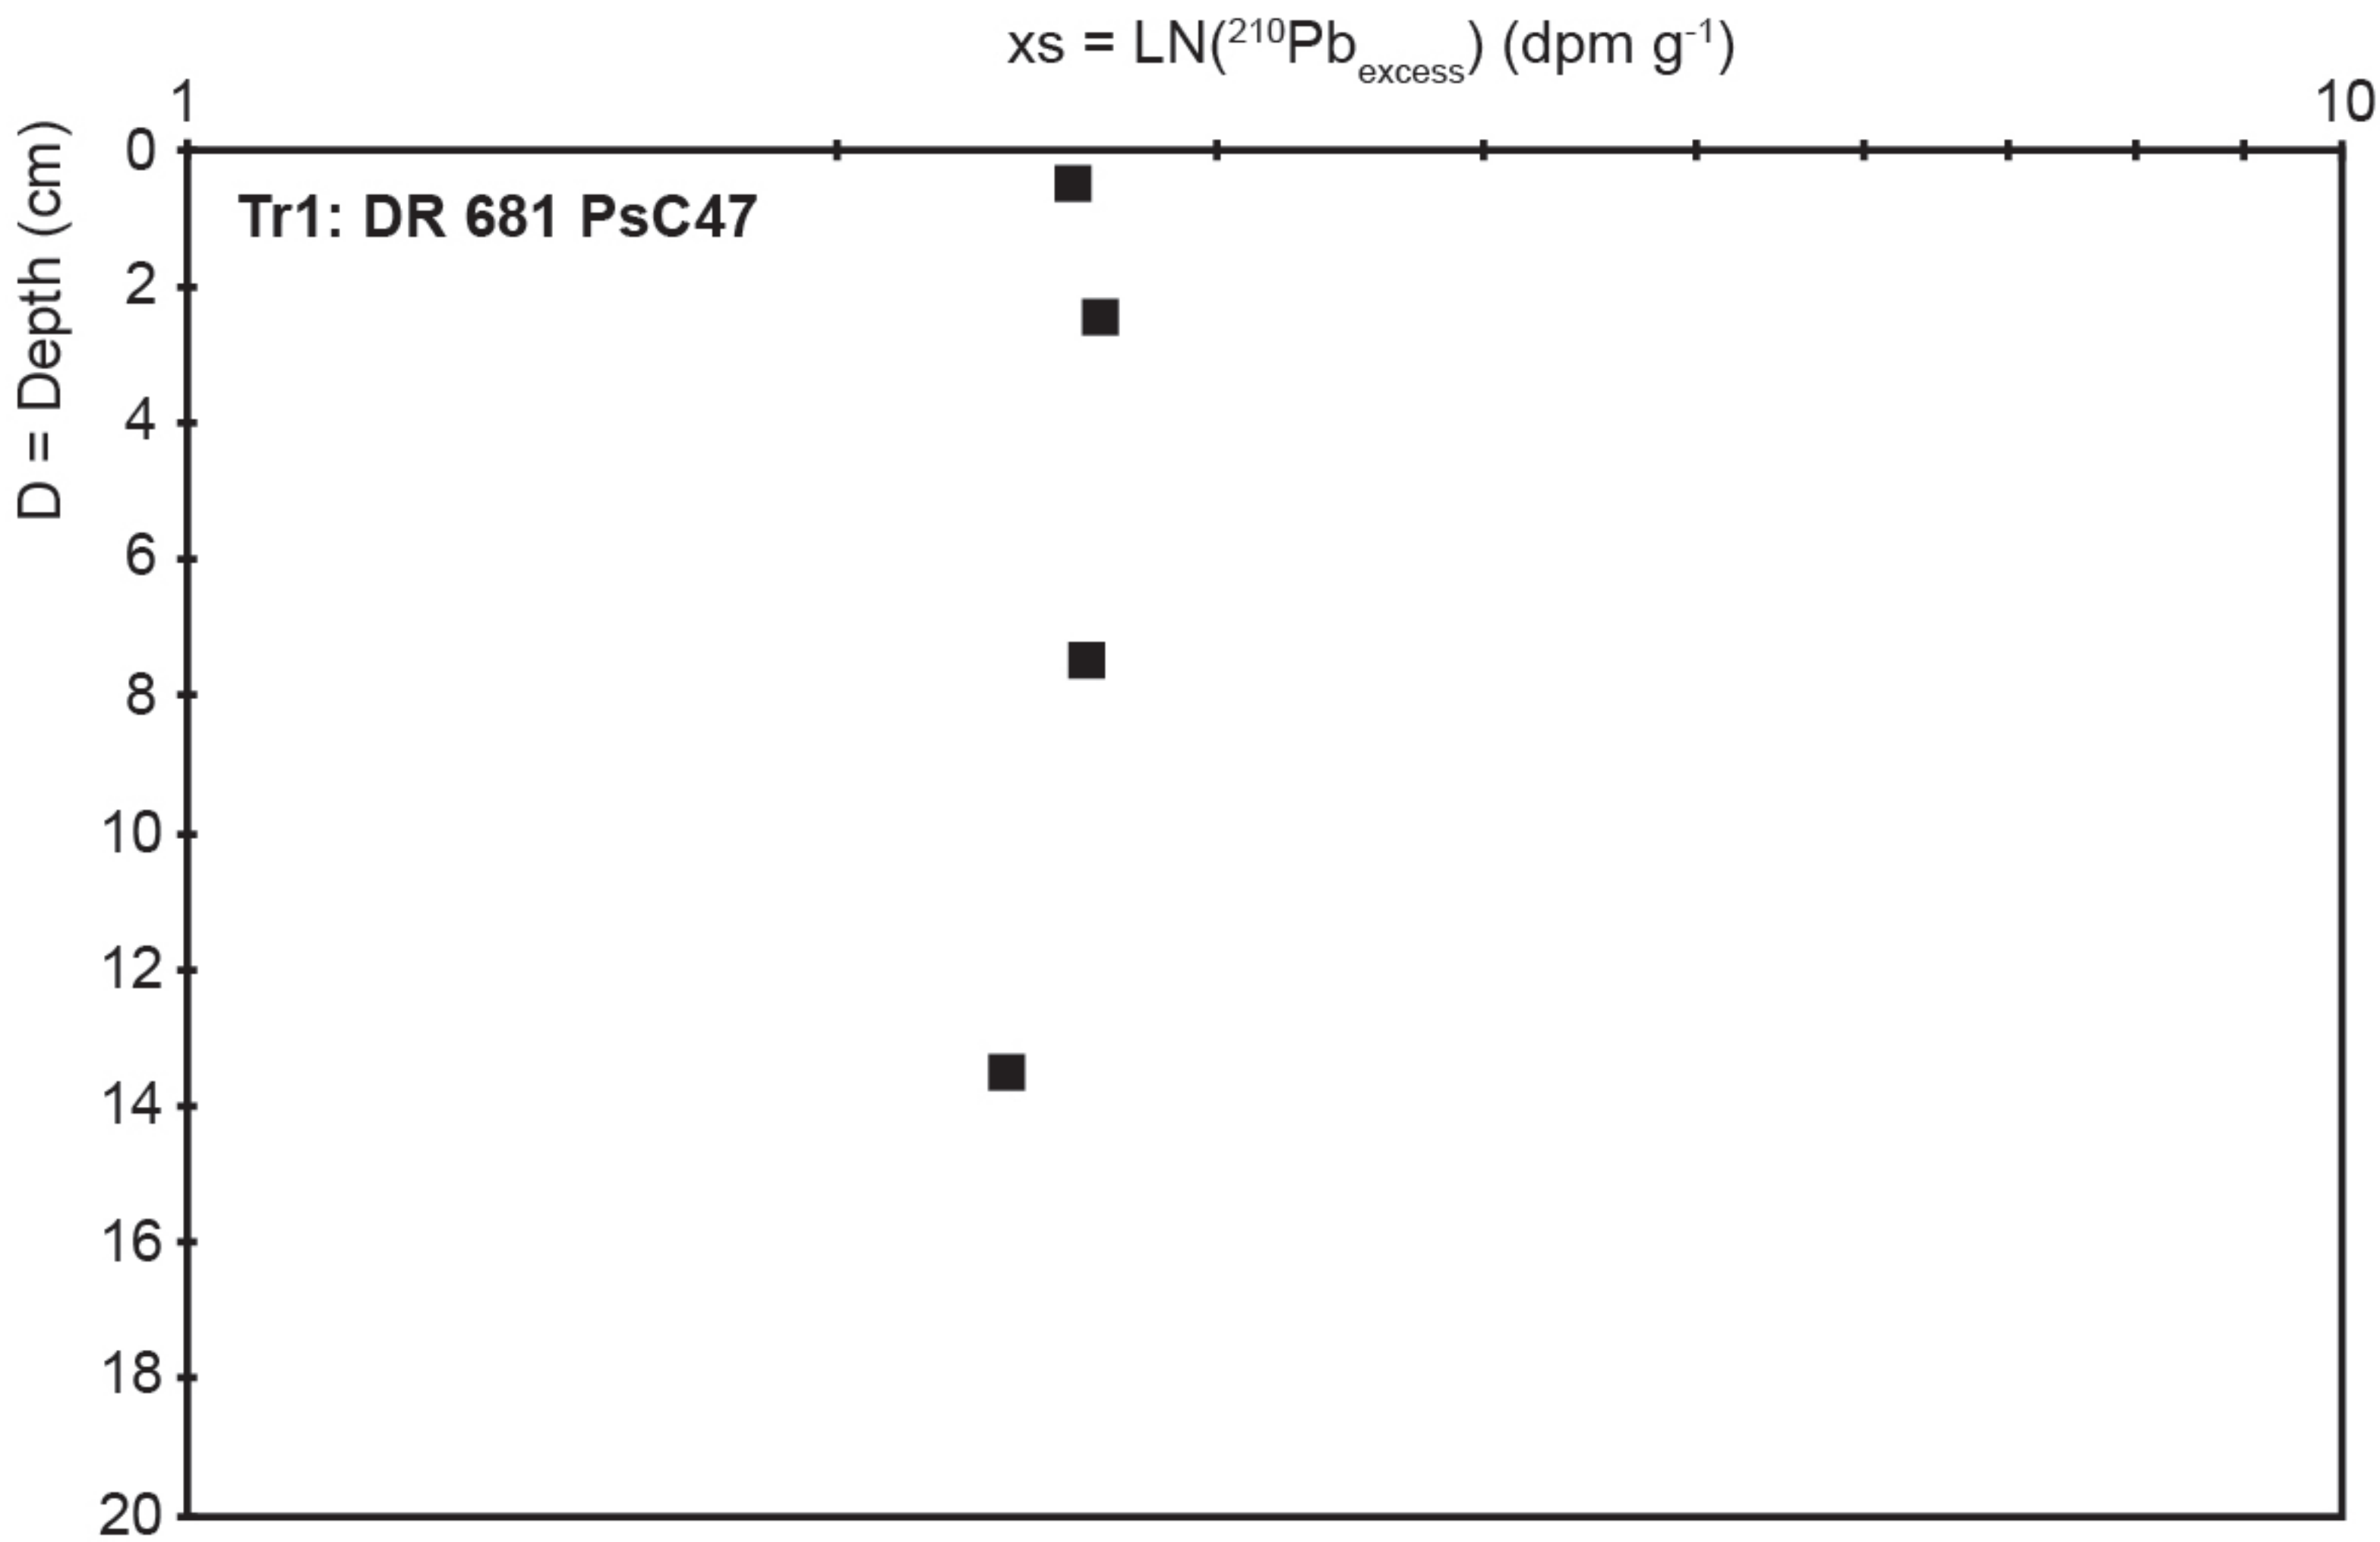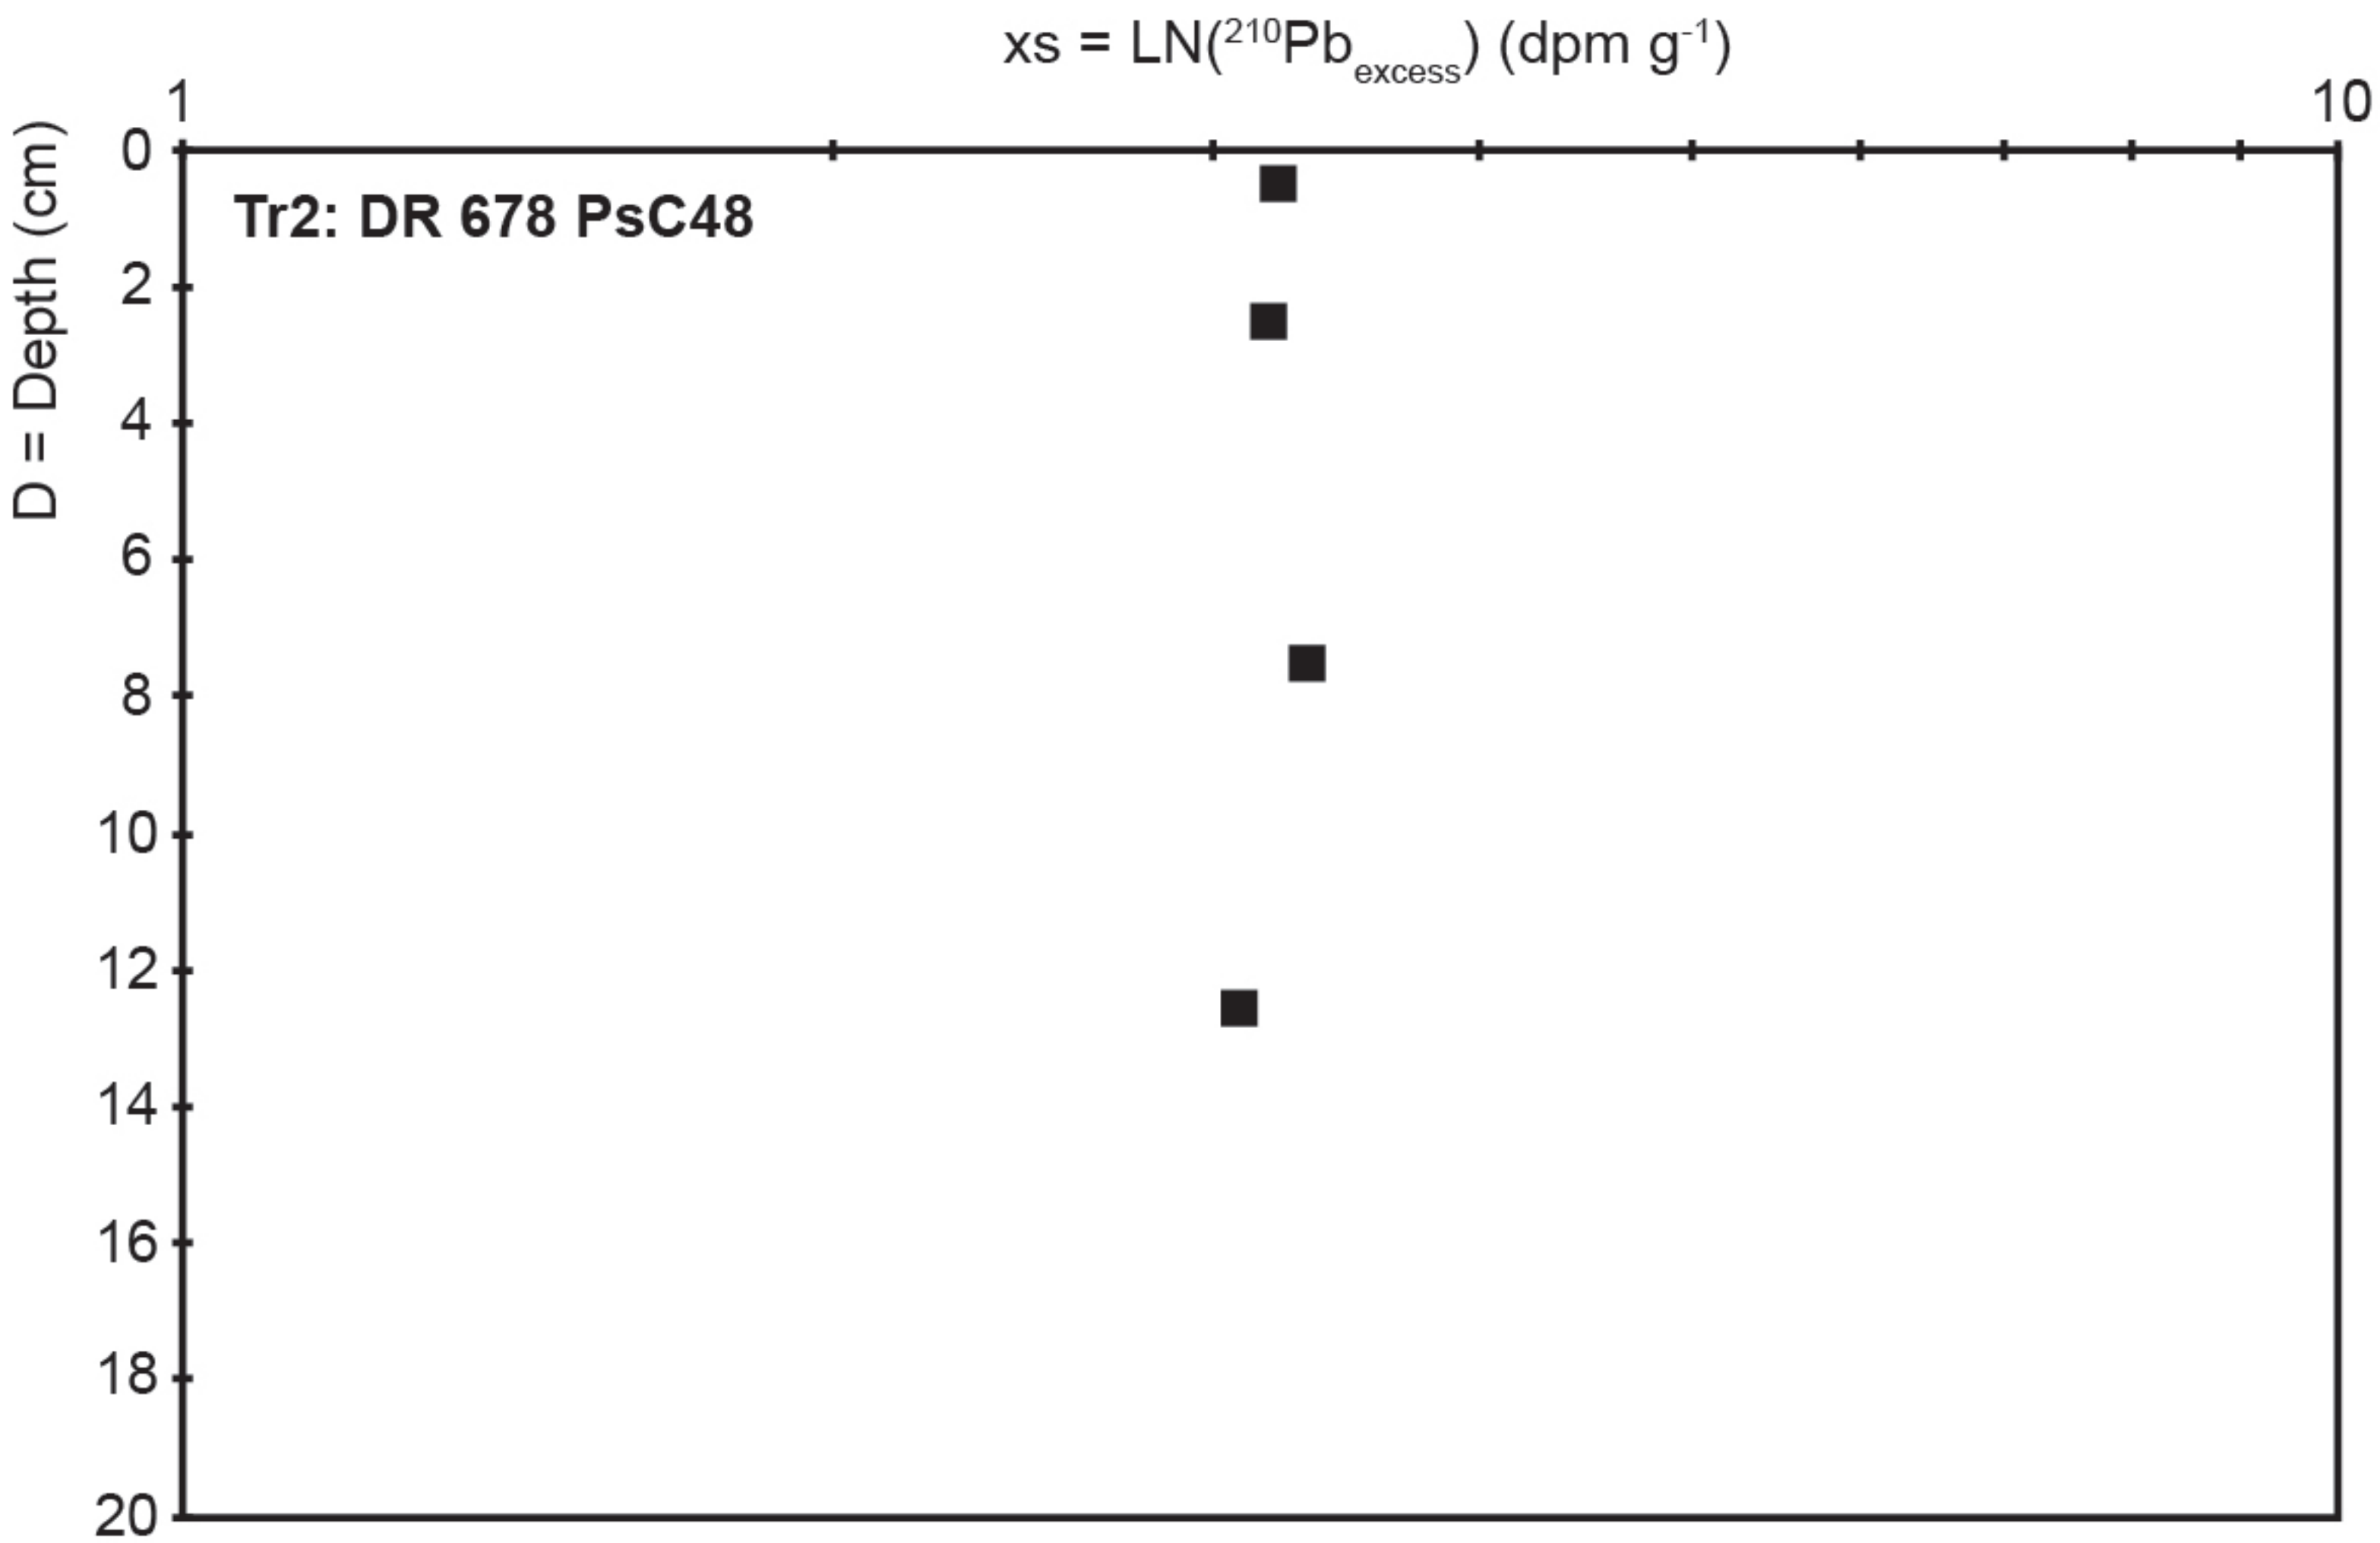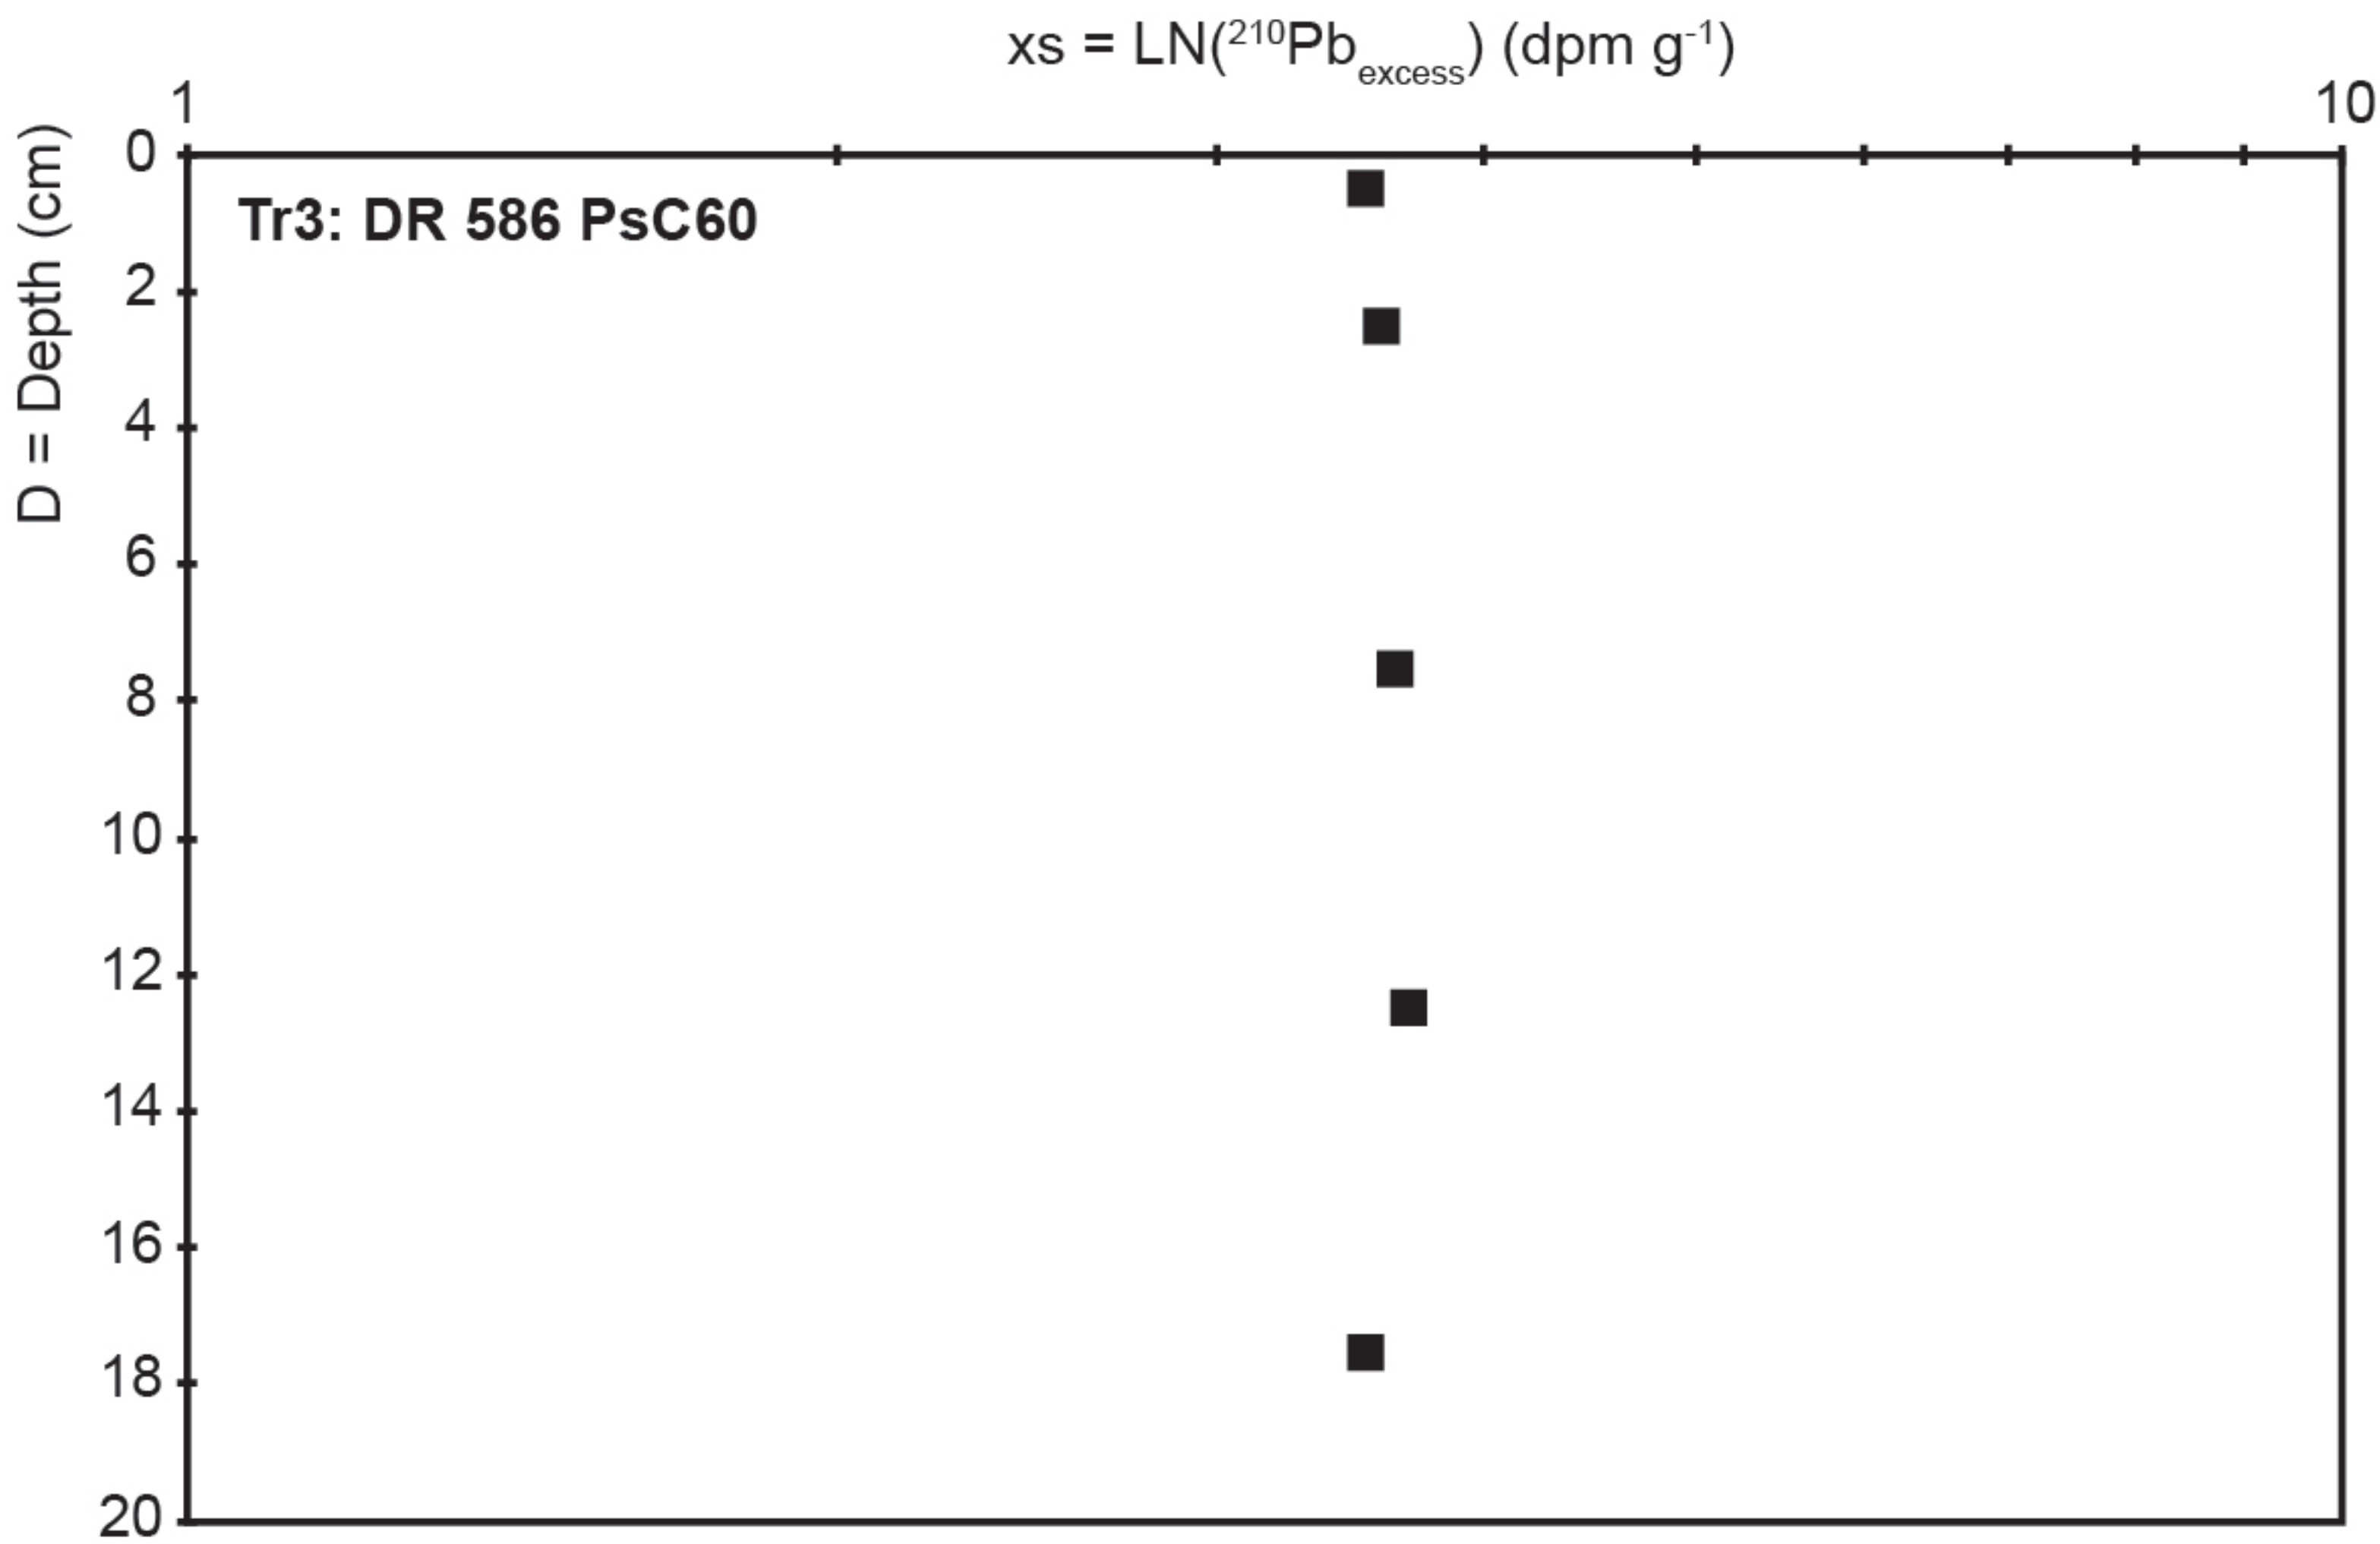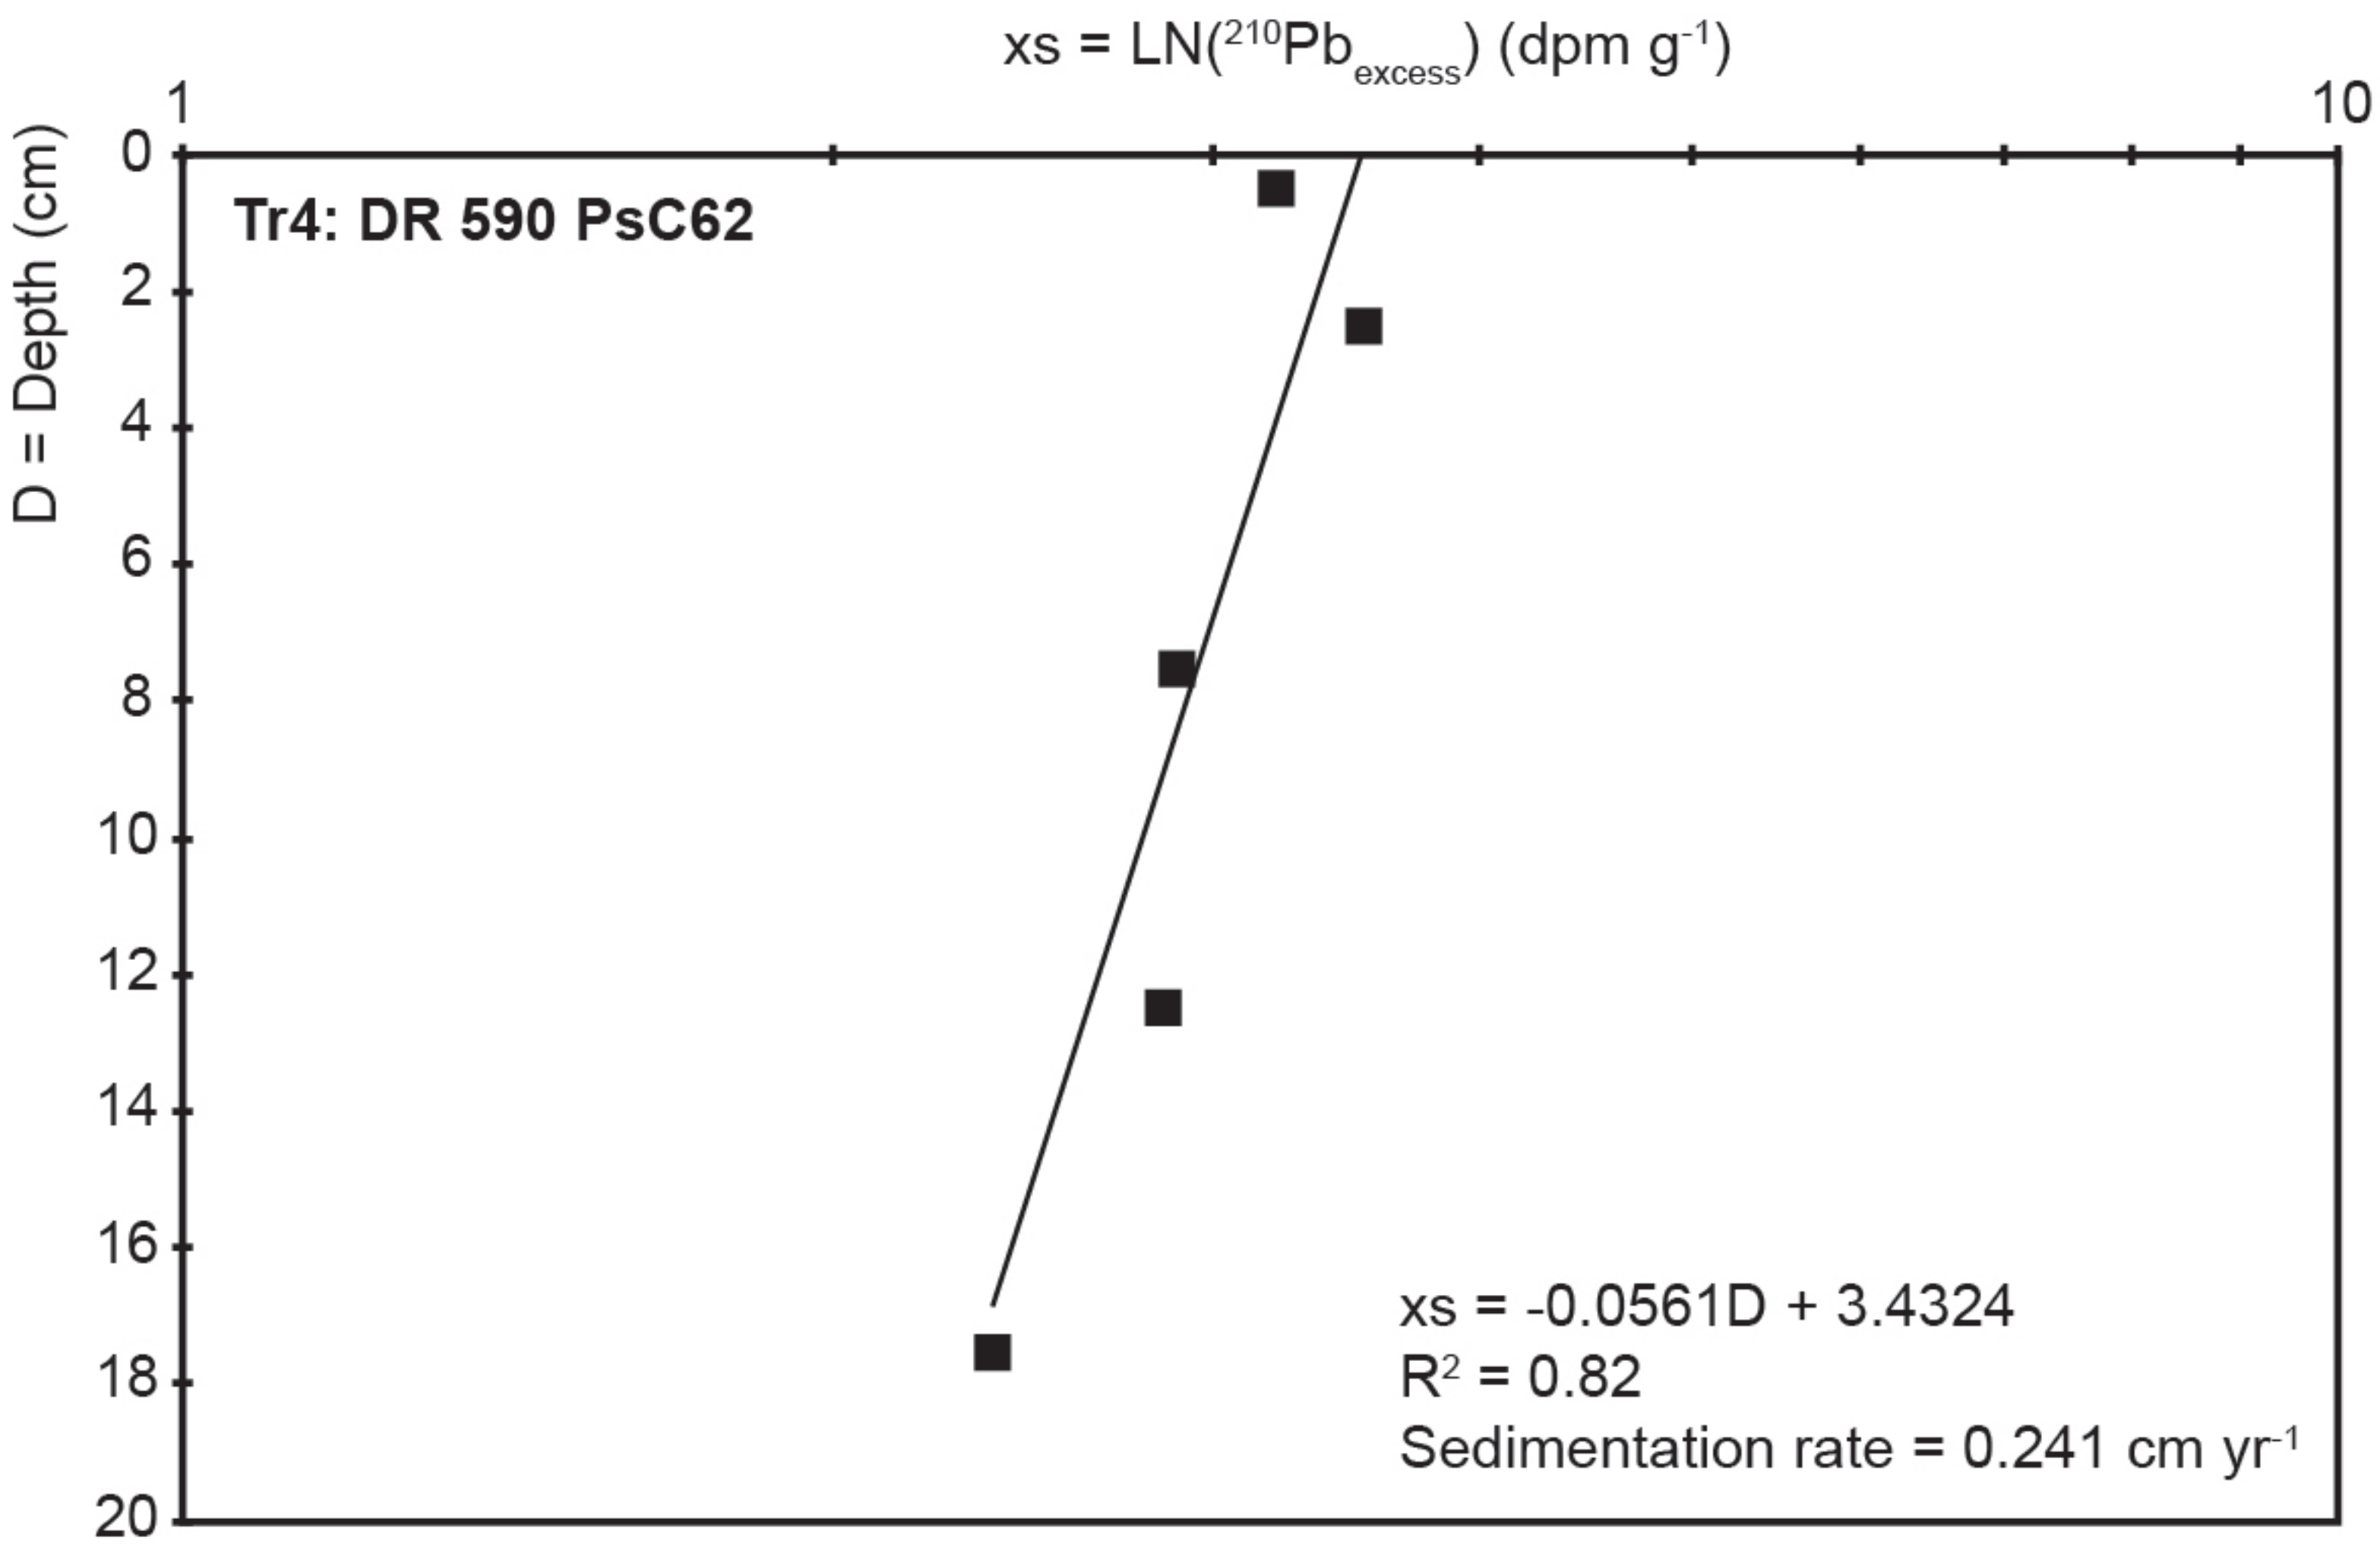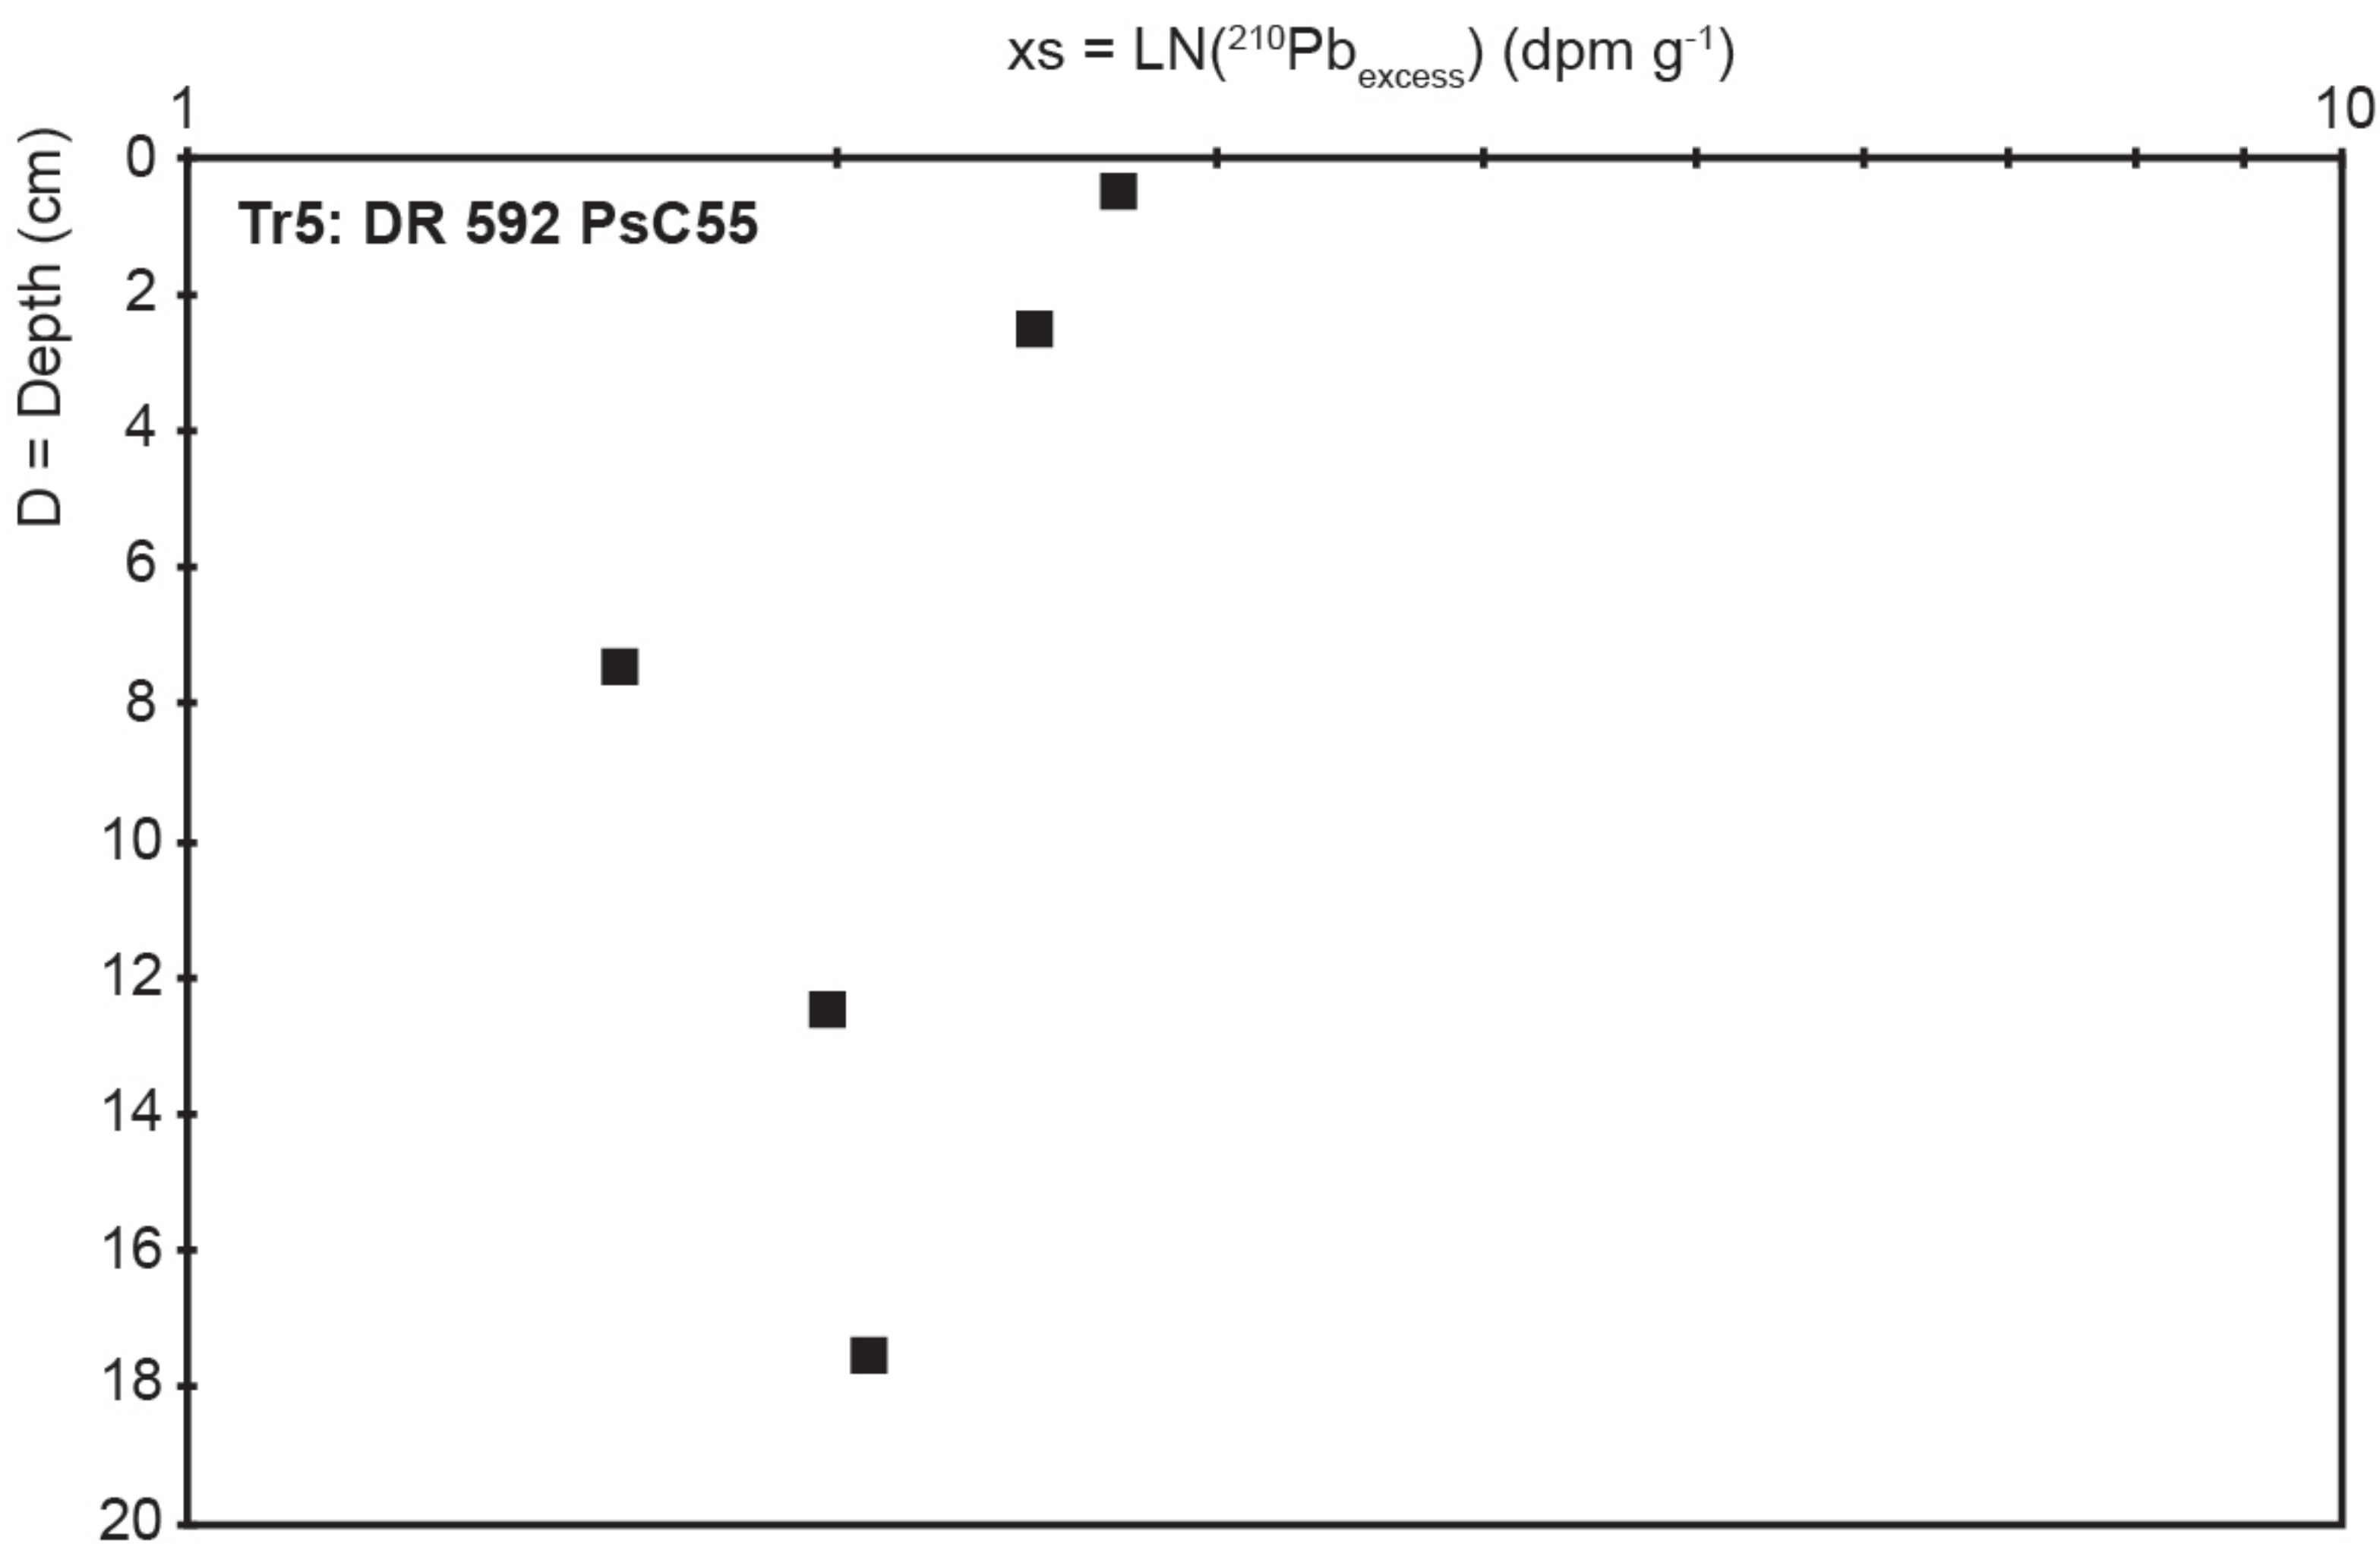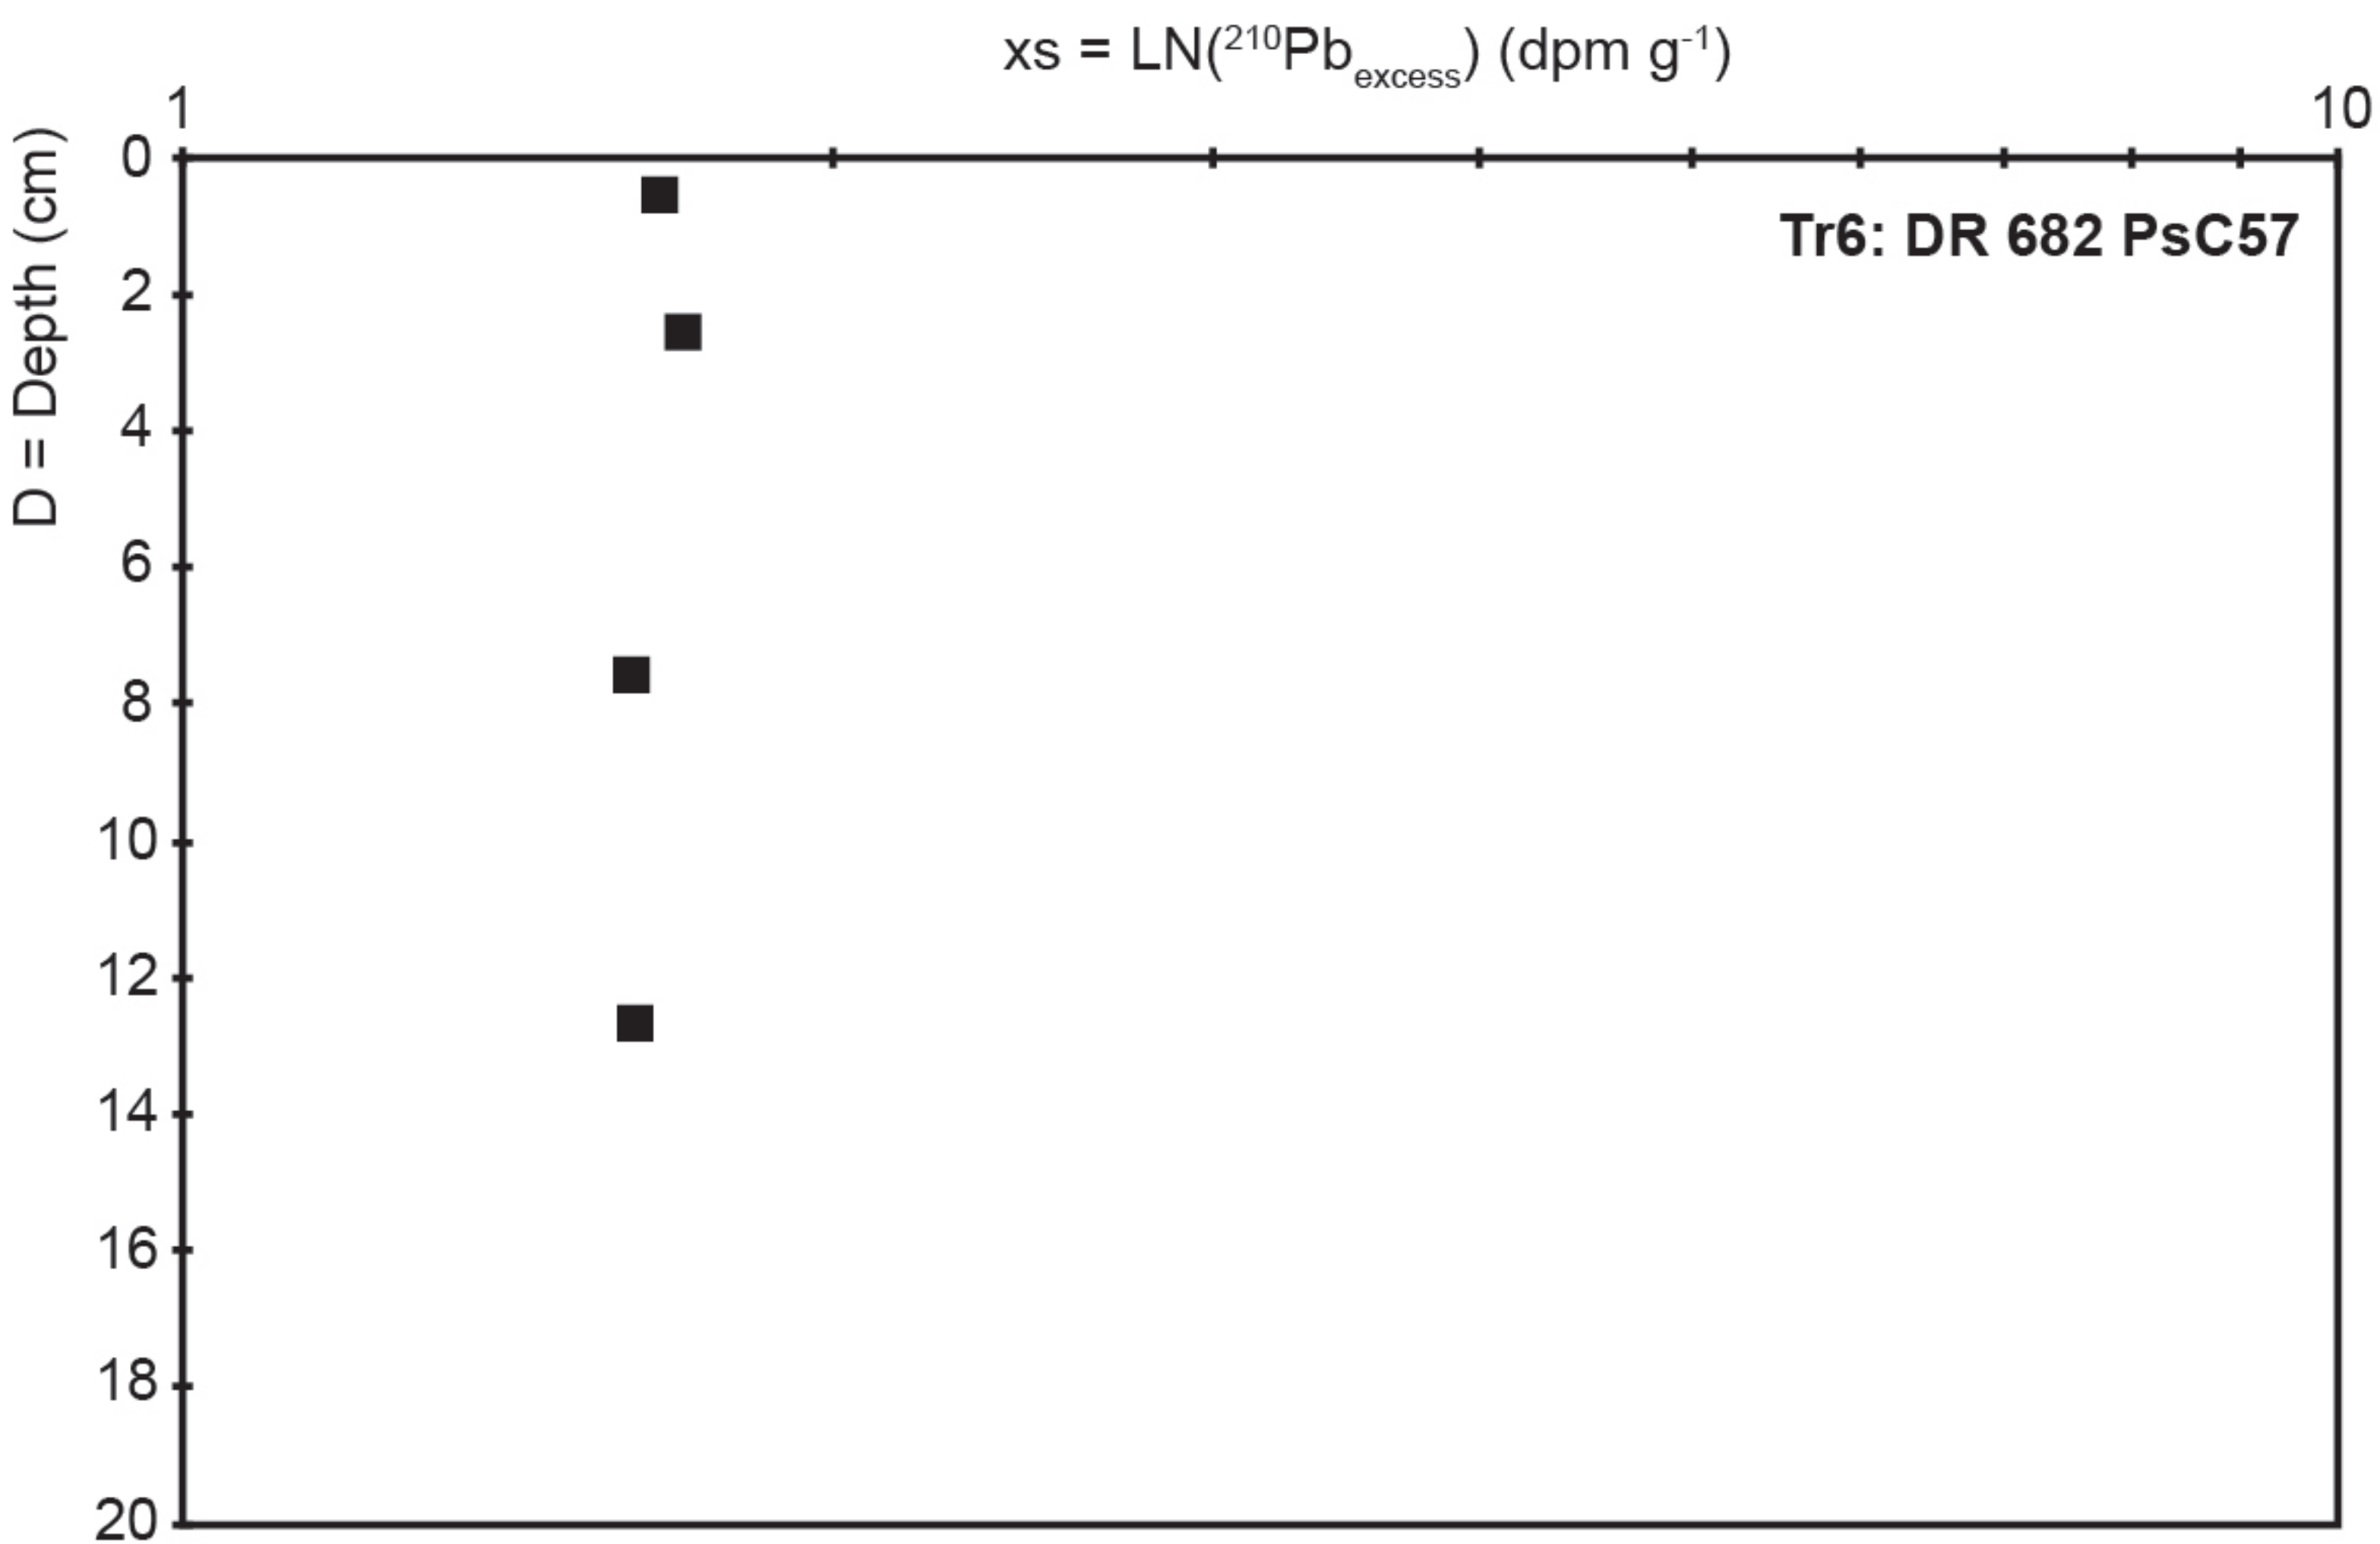



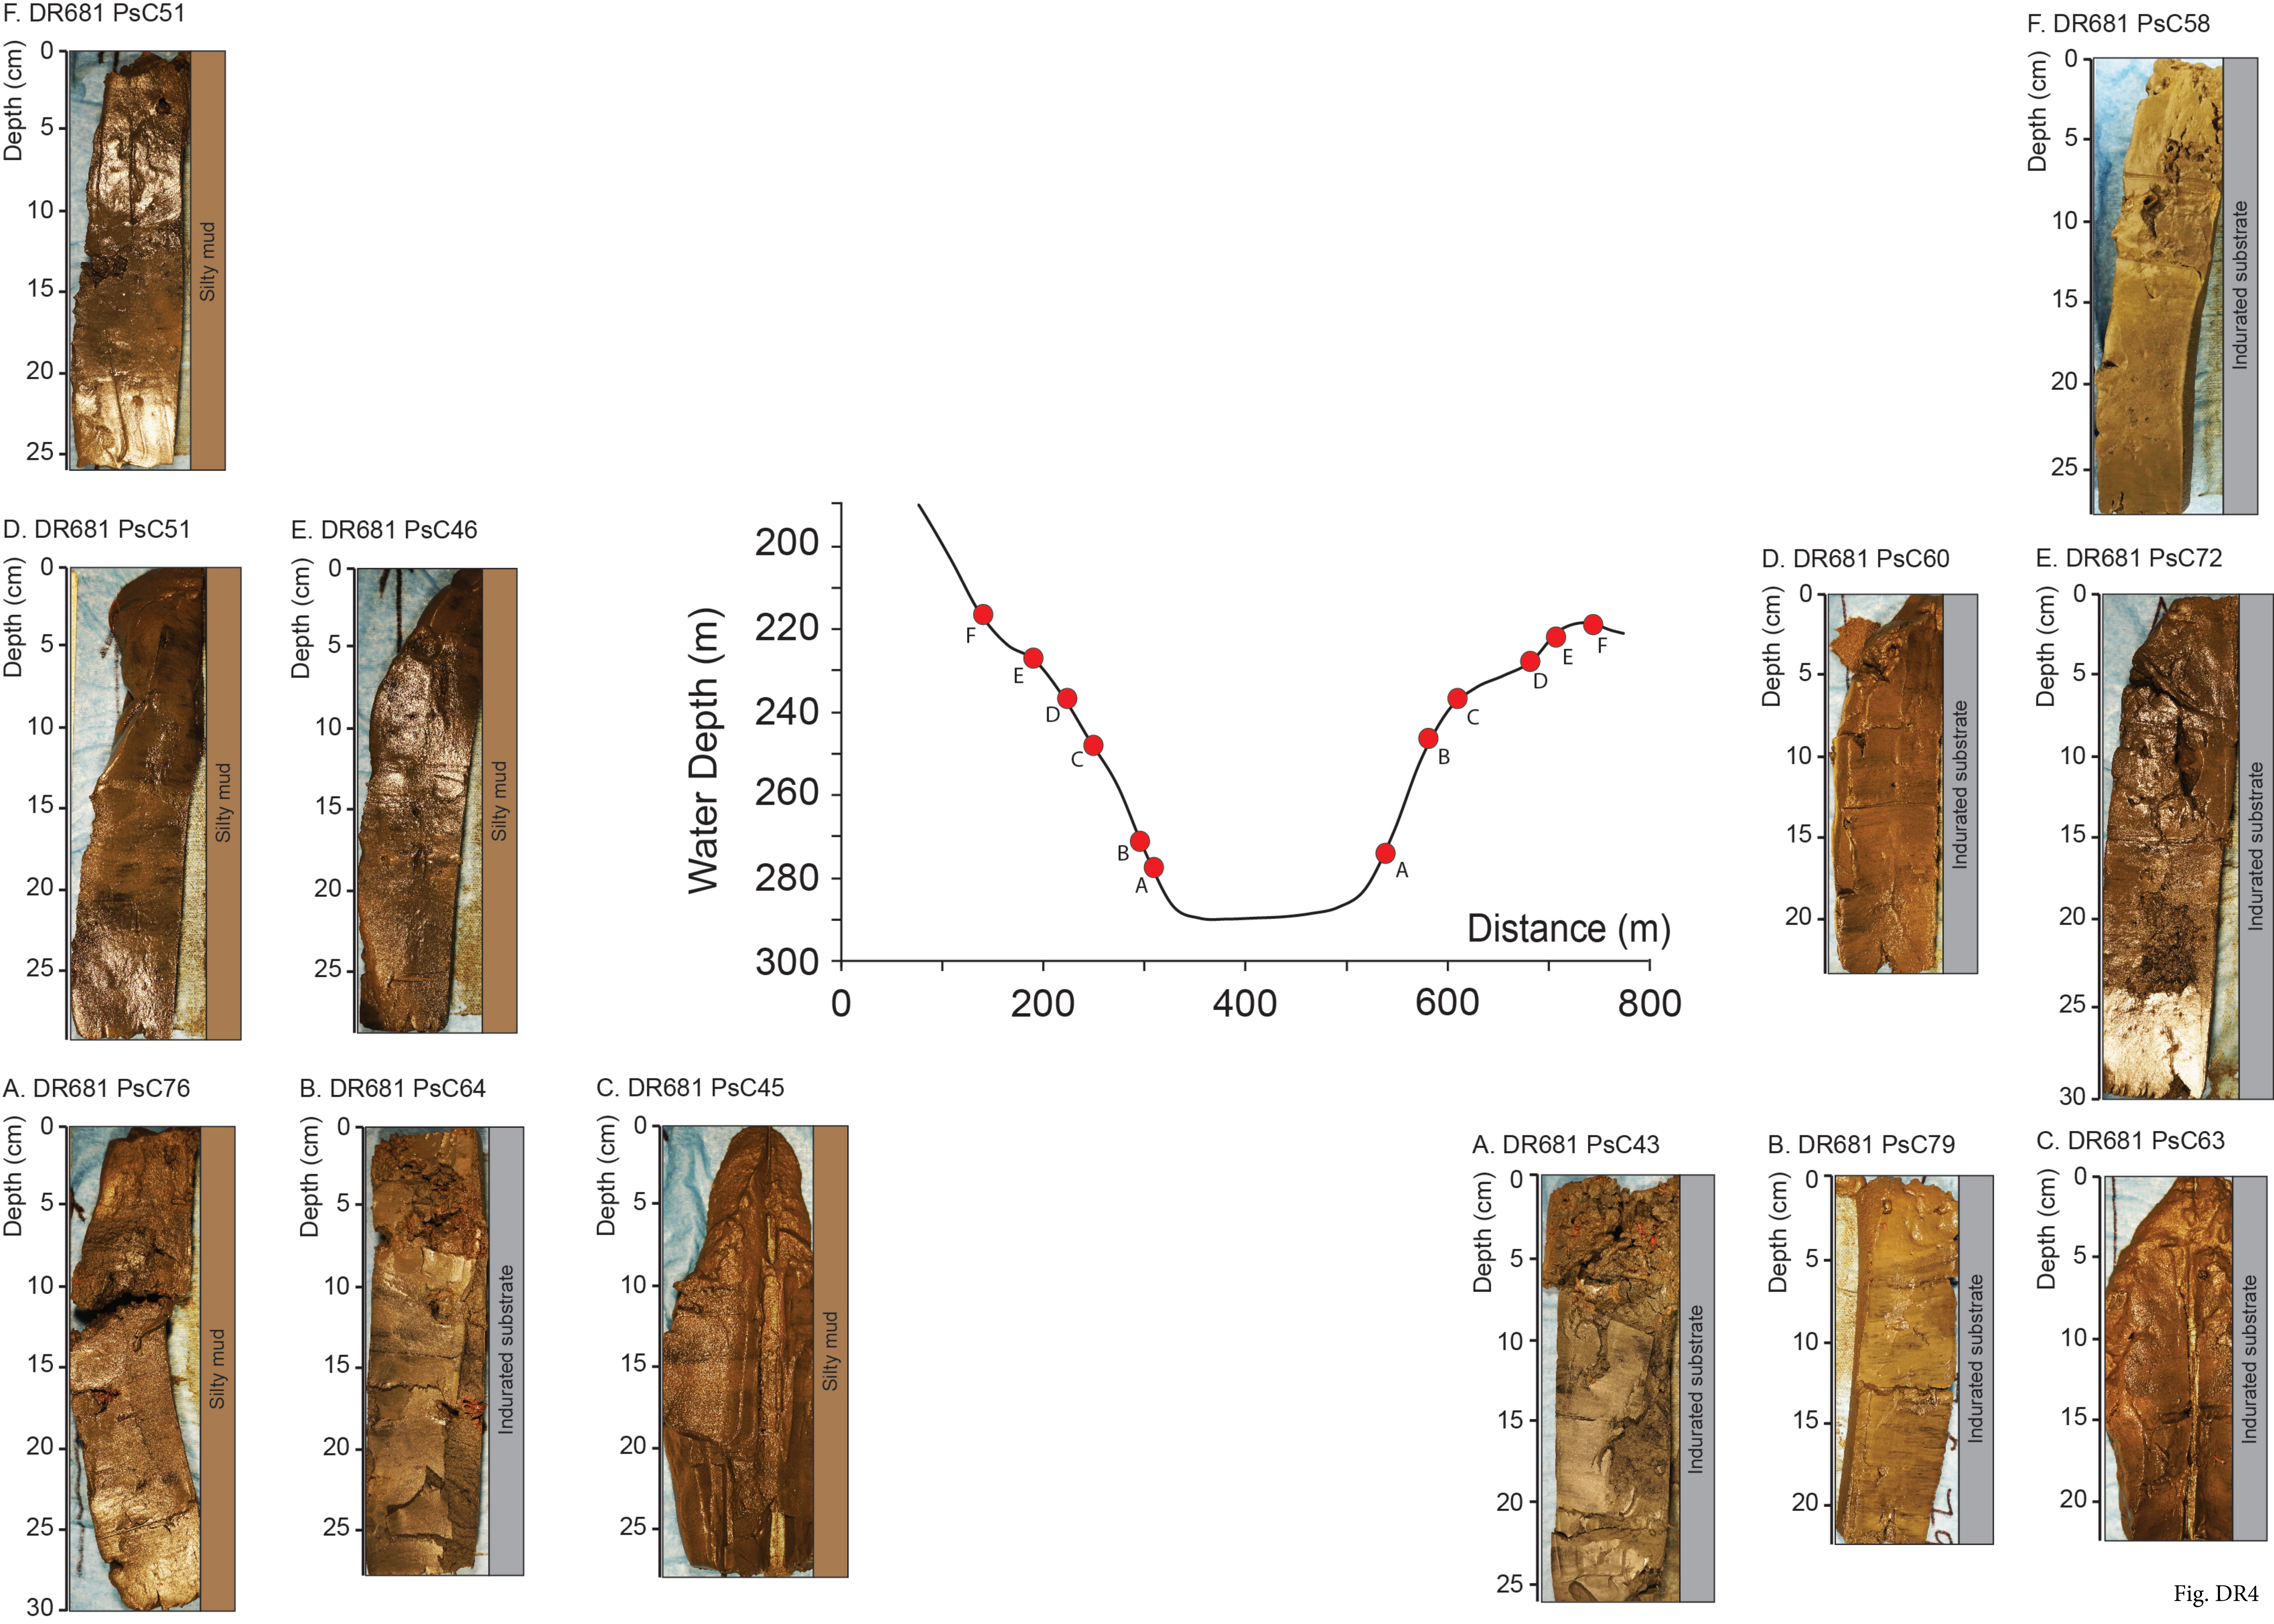

Fig. DR4



Fig. DR5

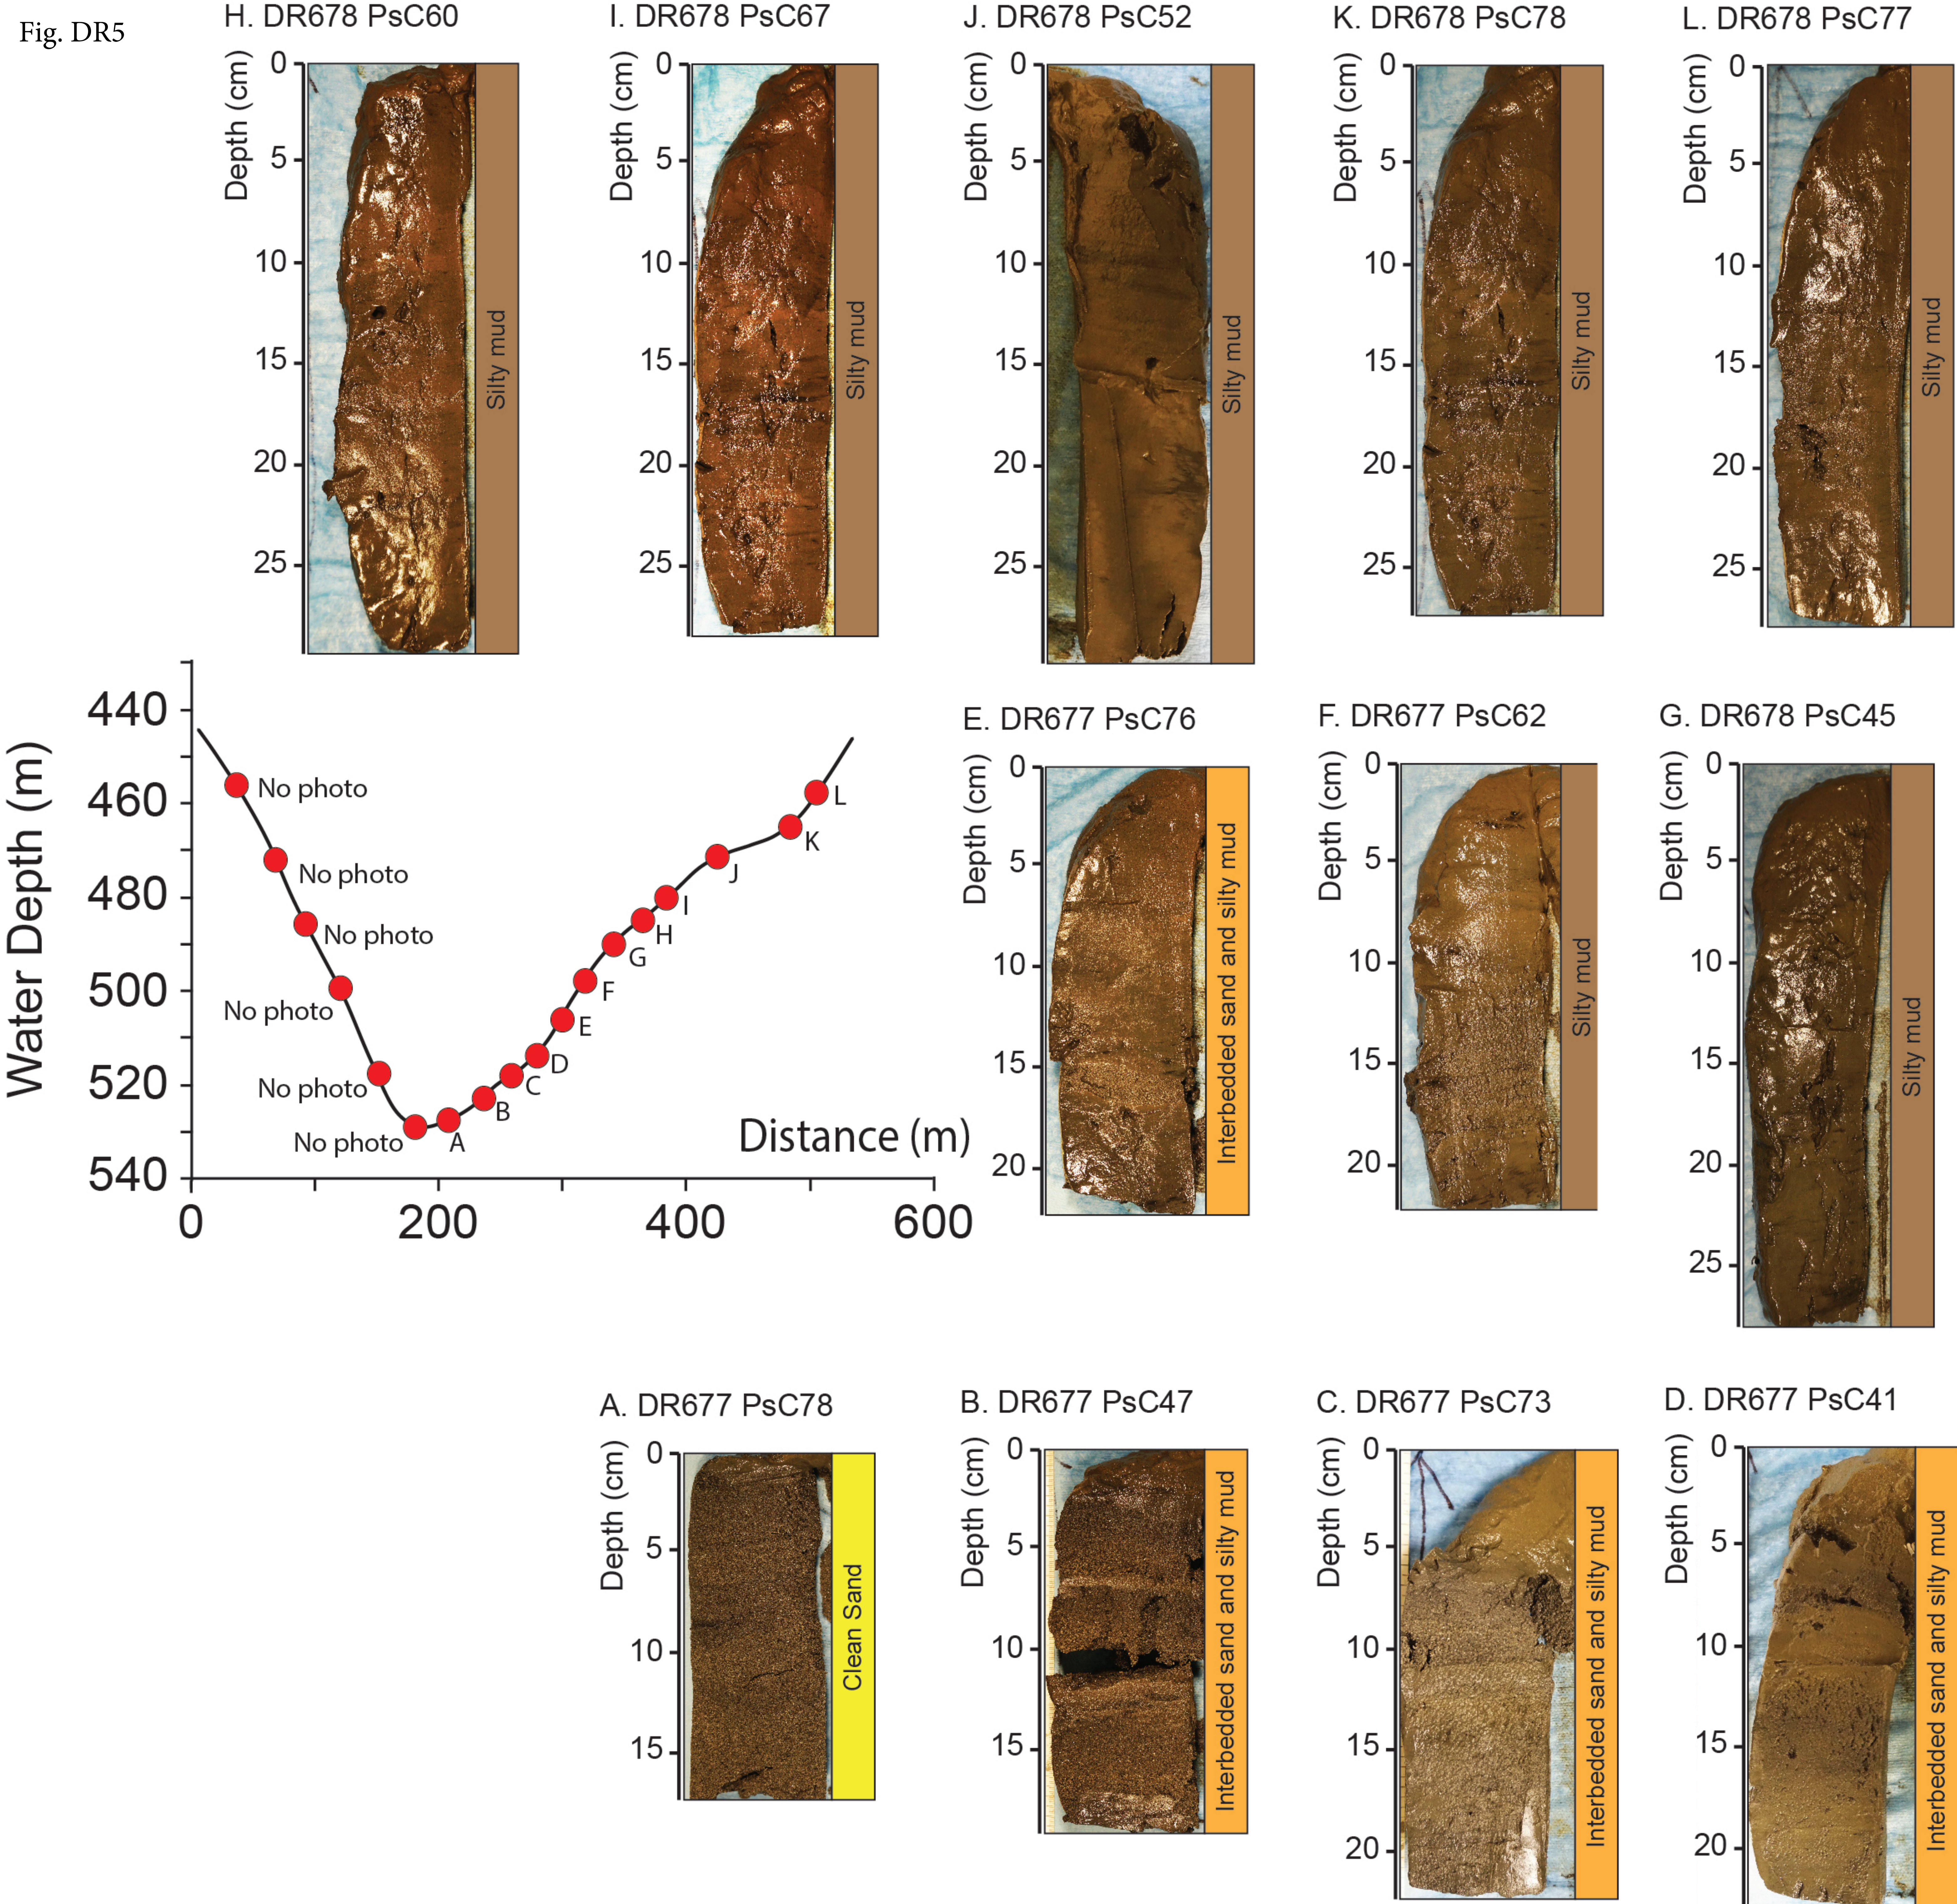



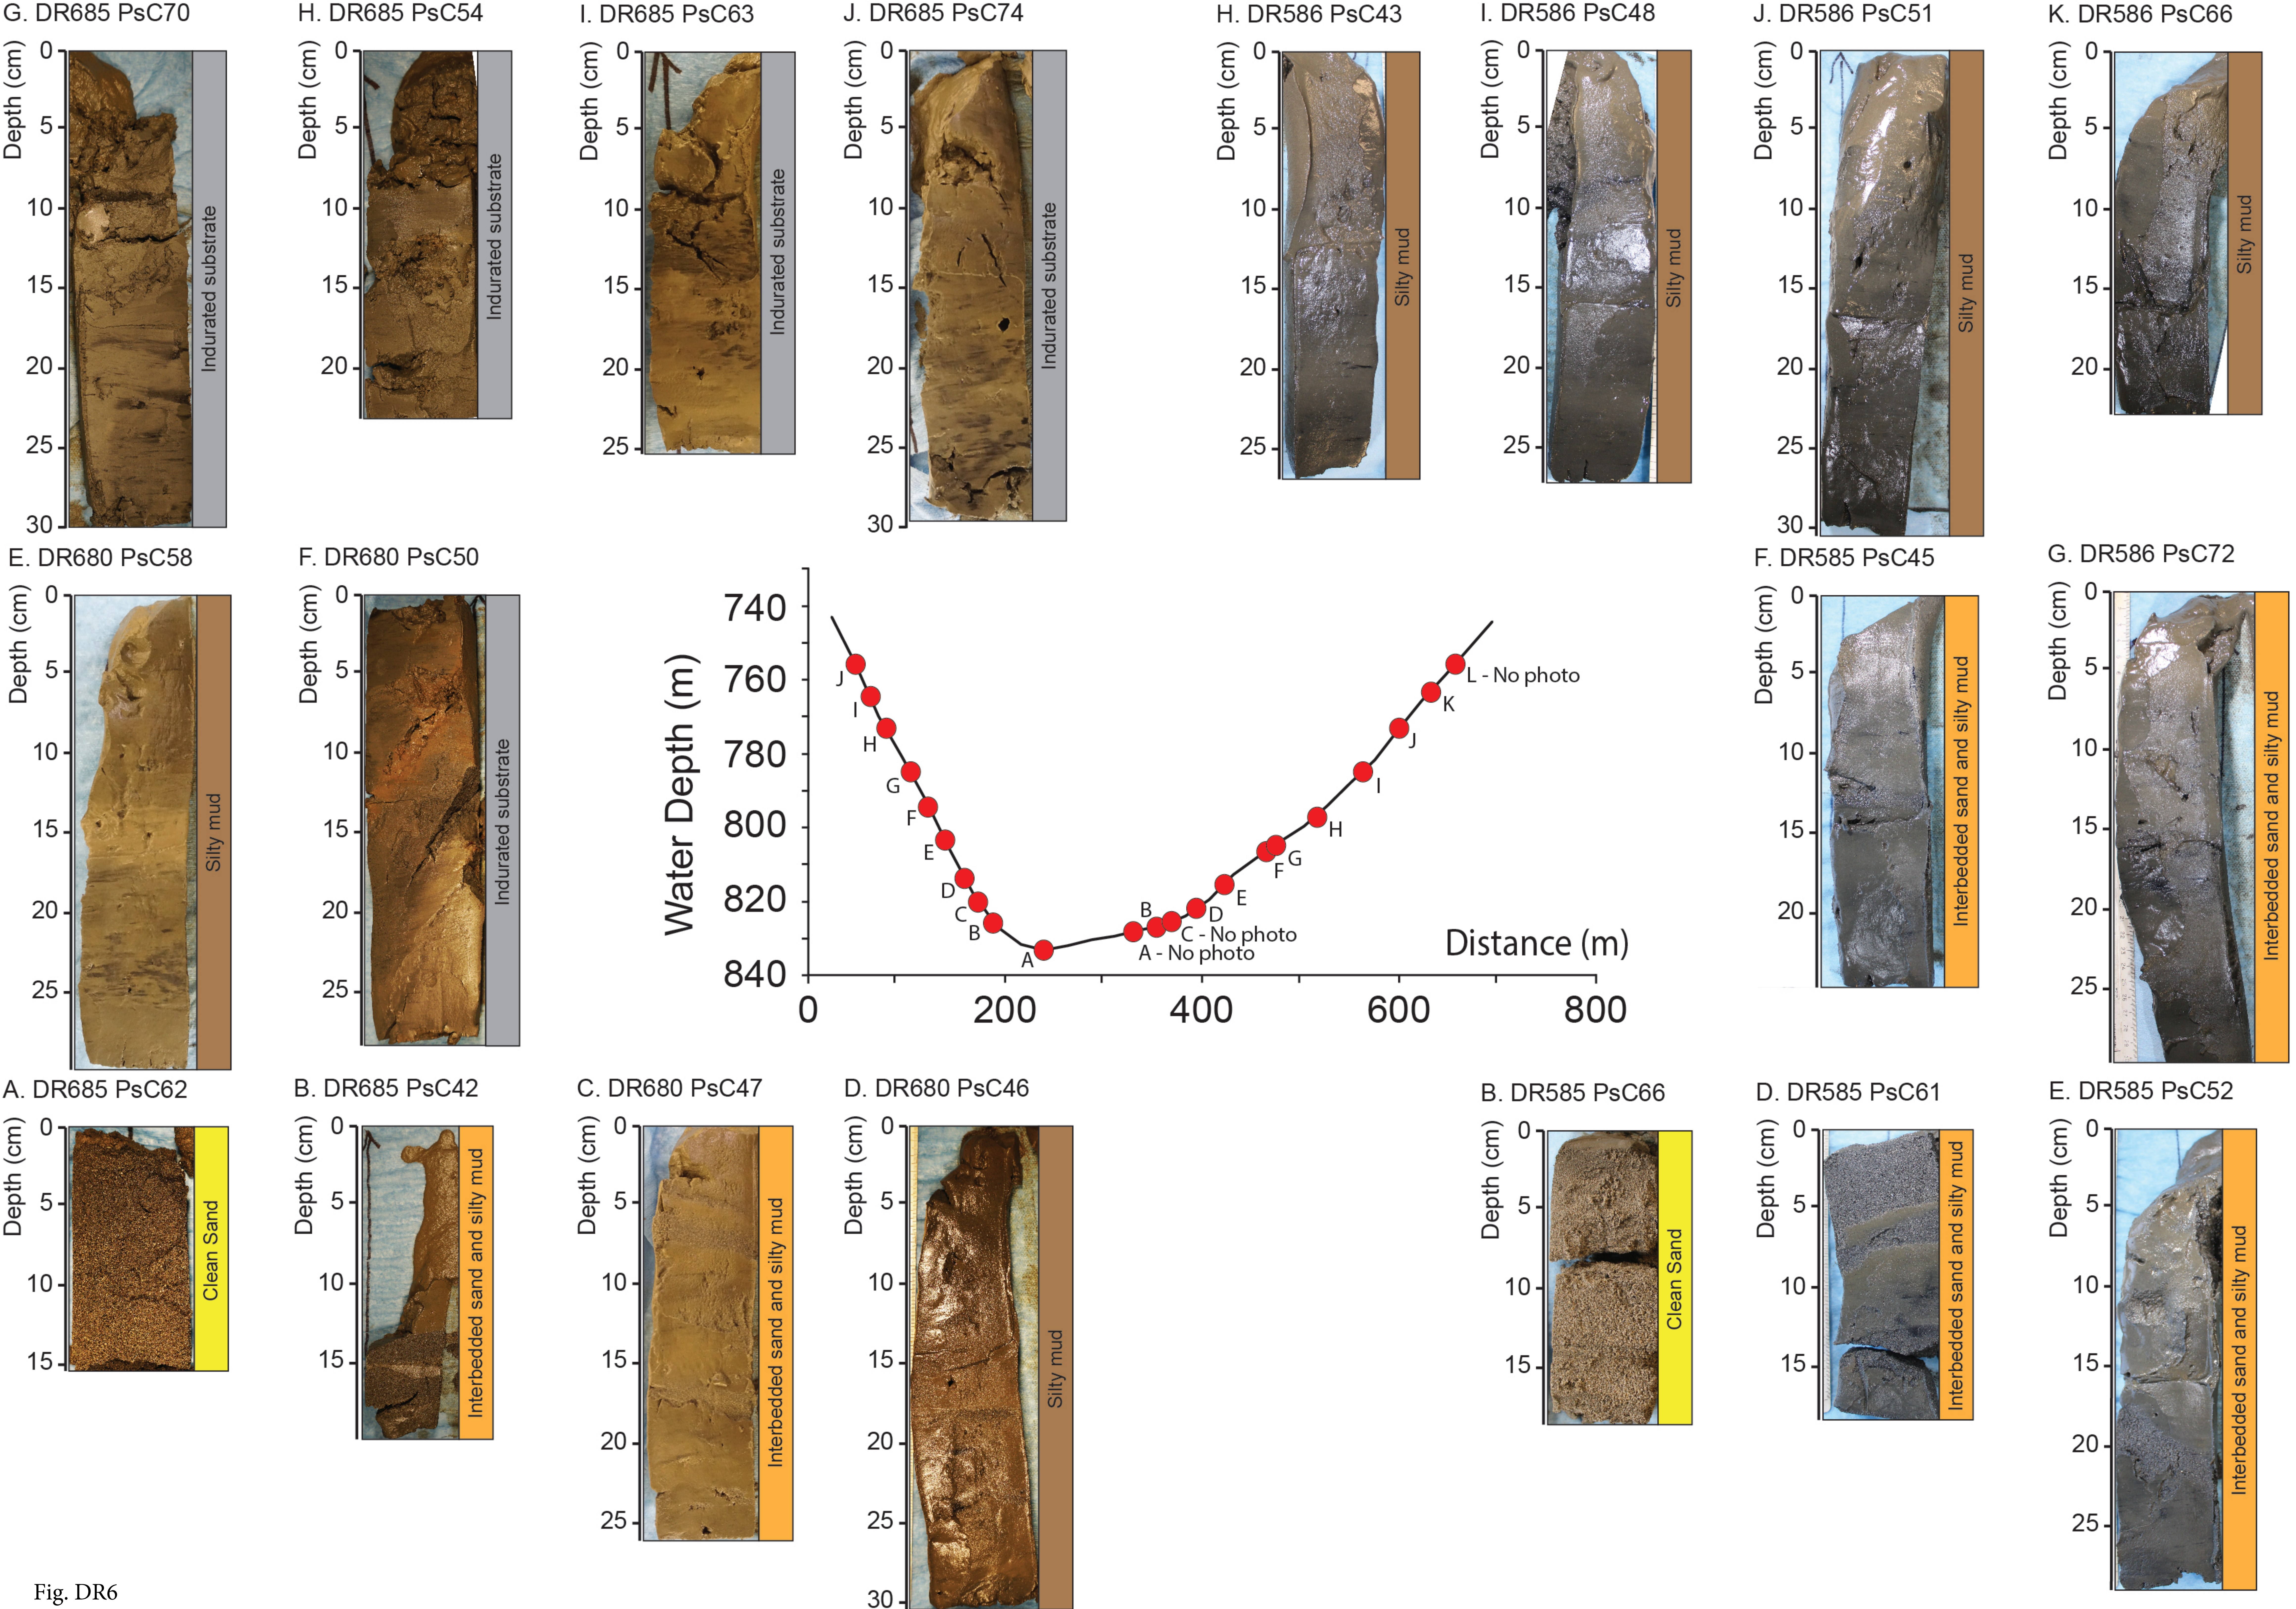

Fig. DR6



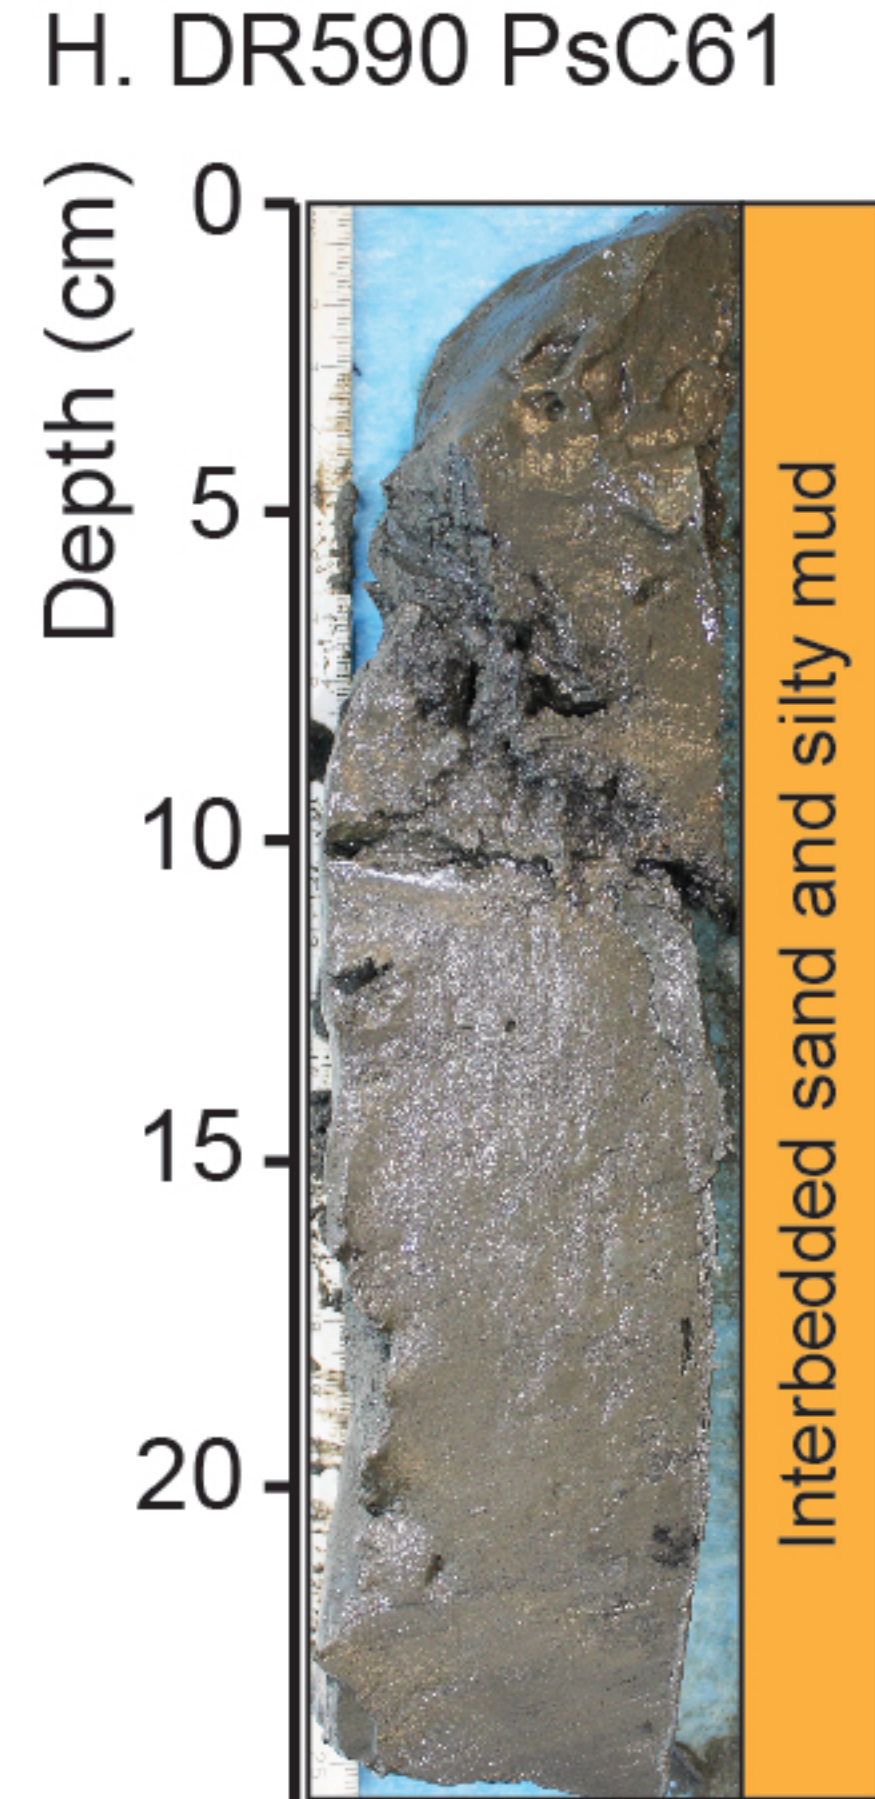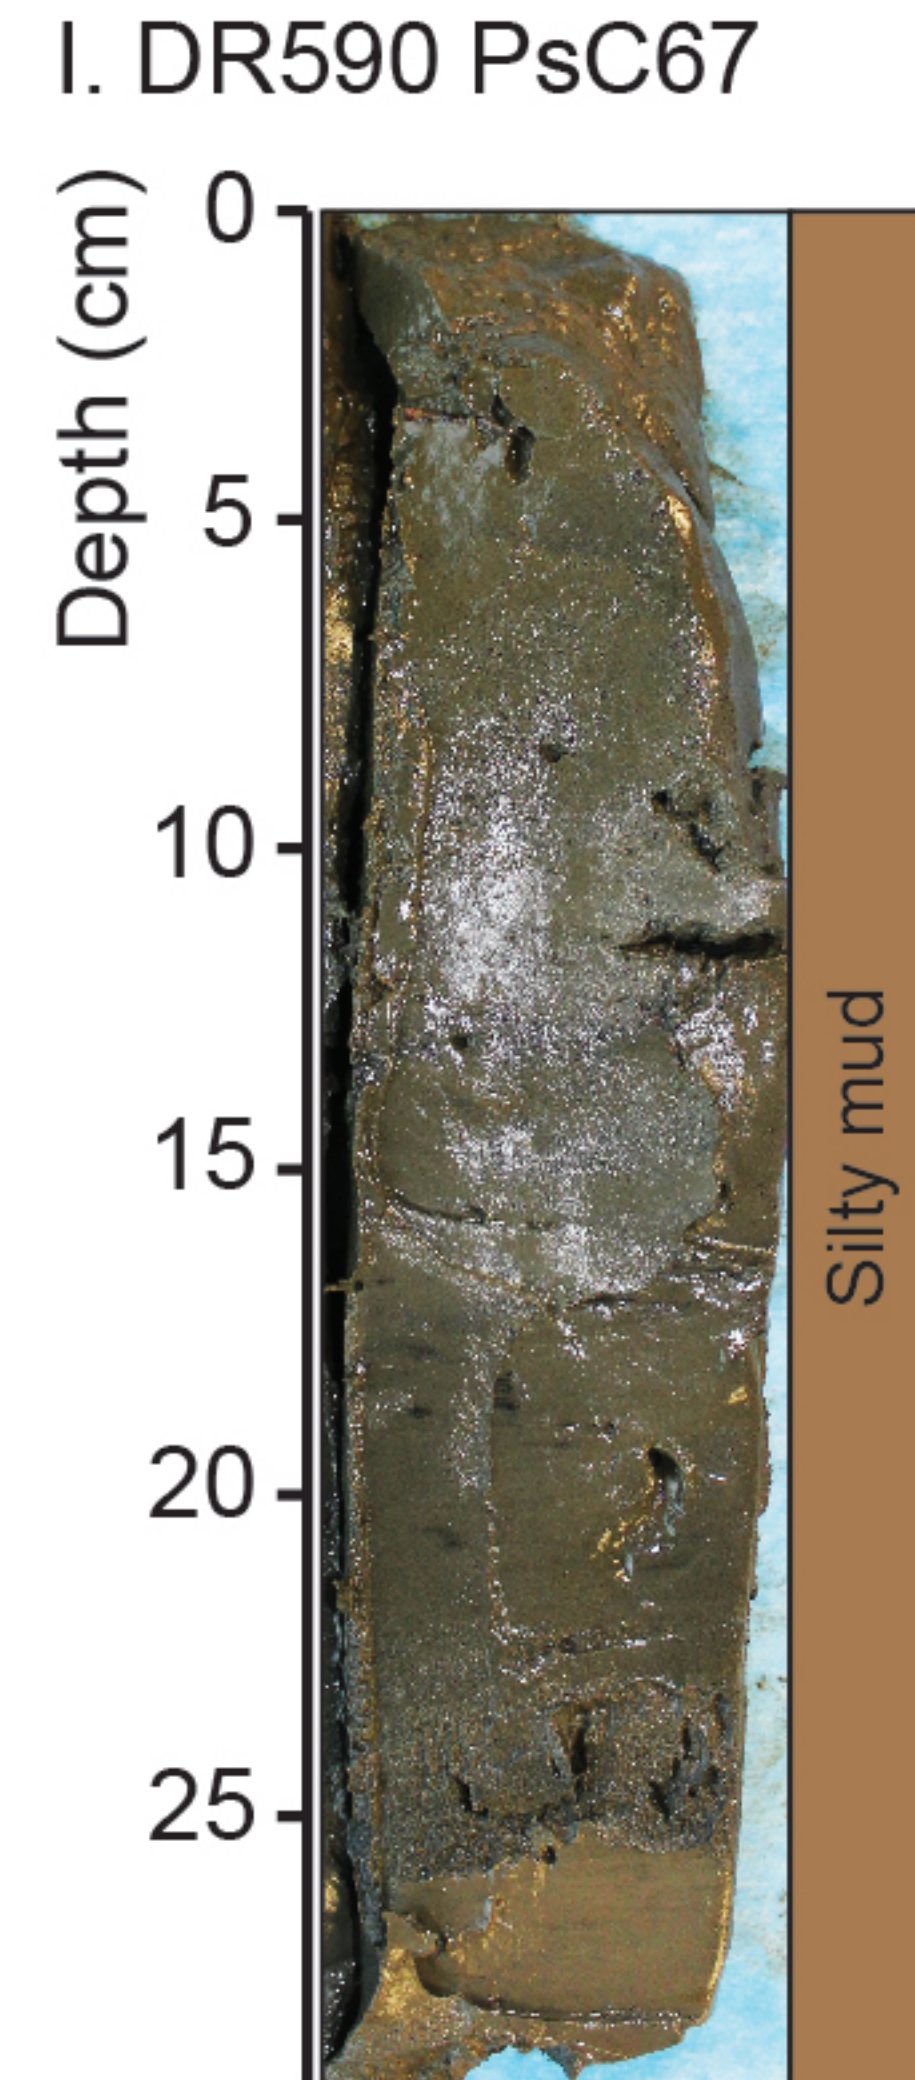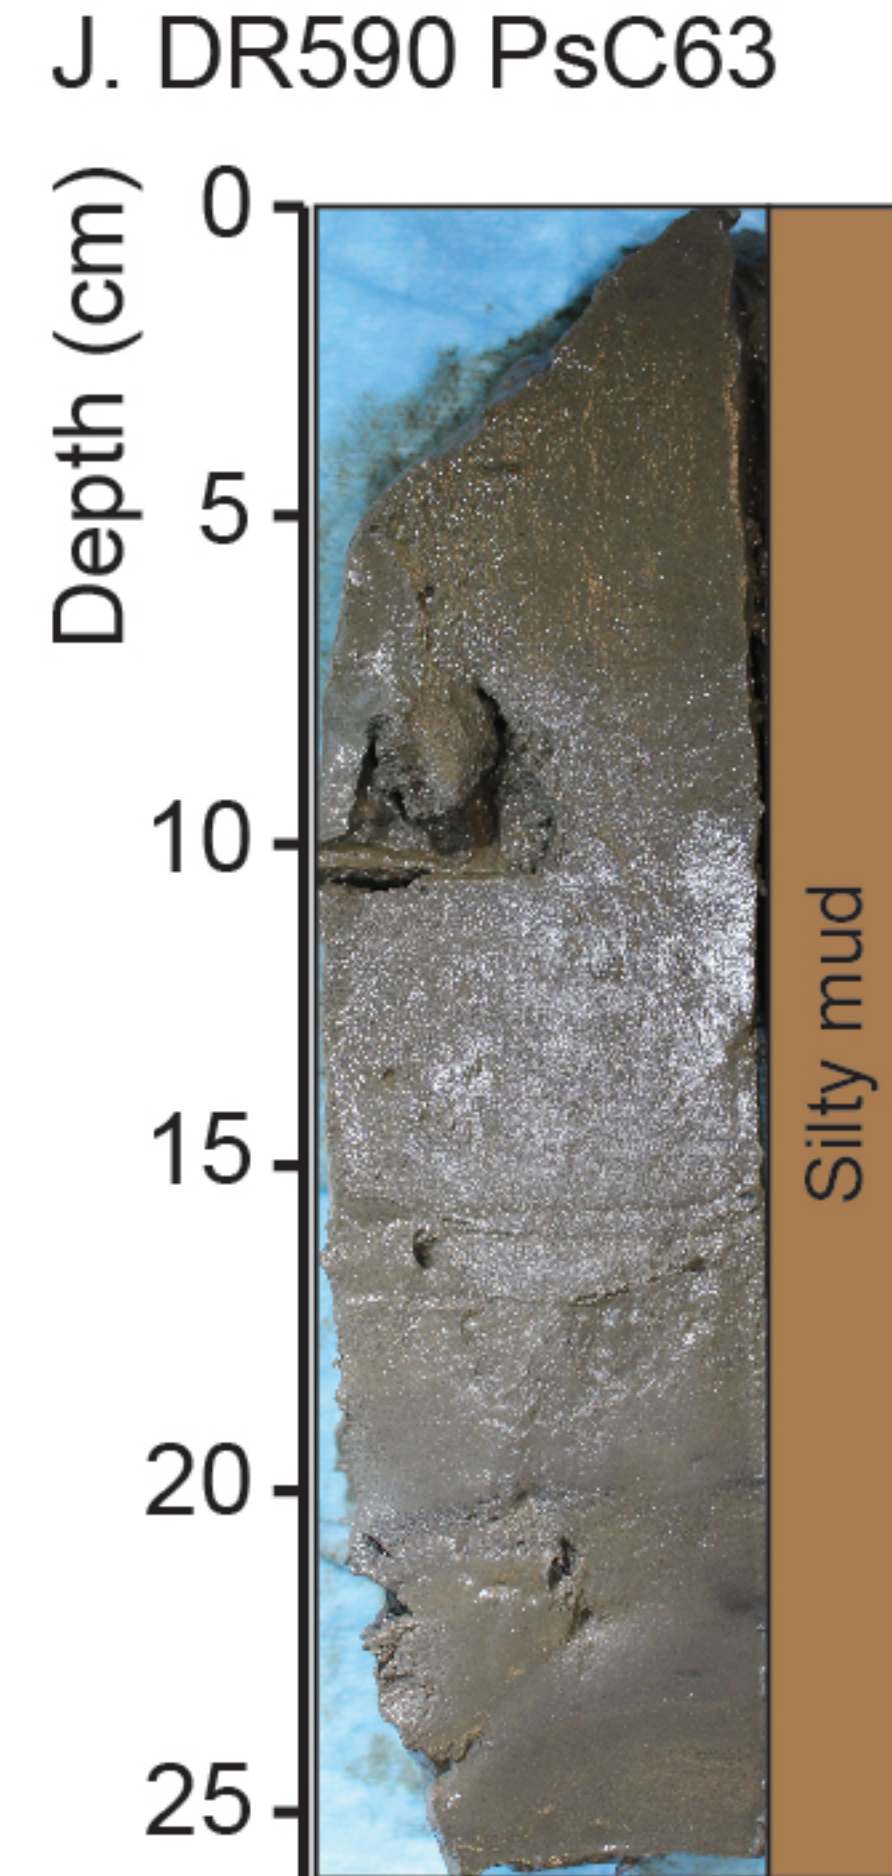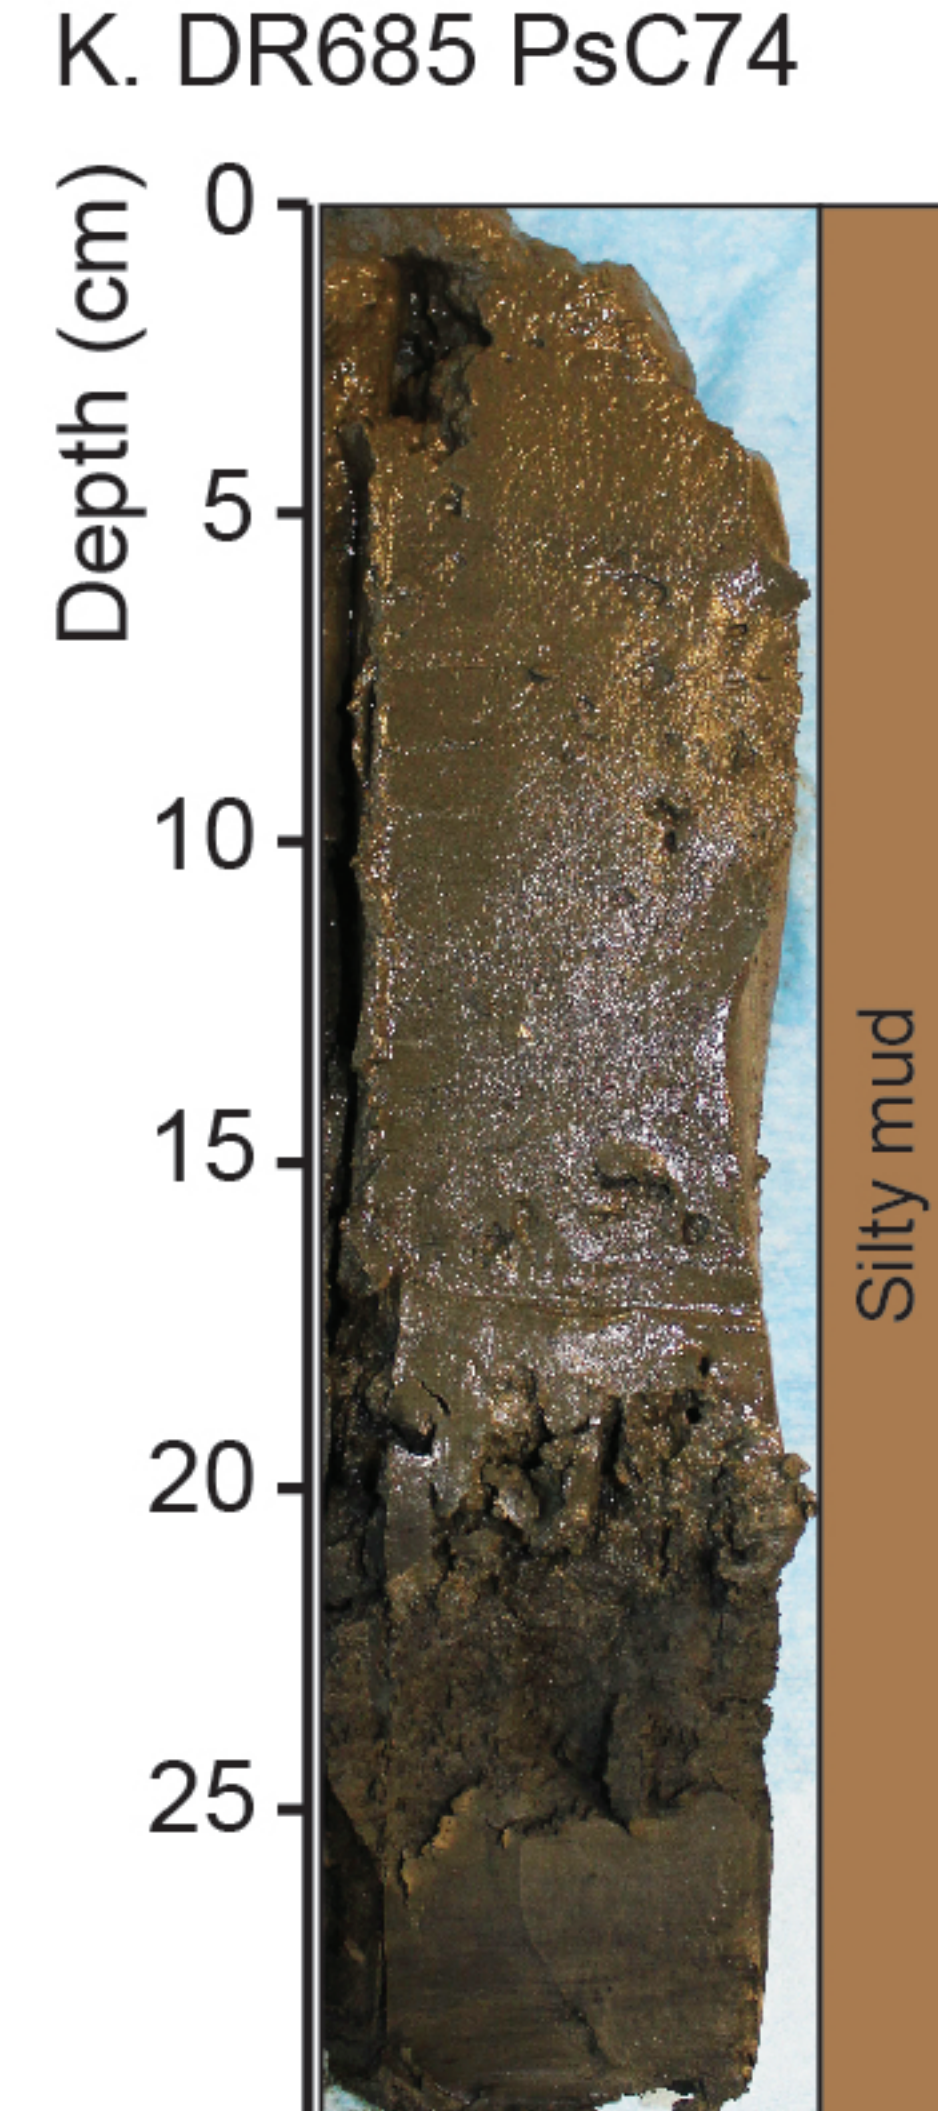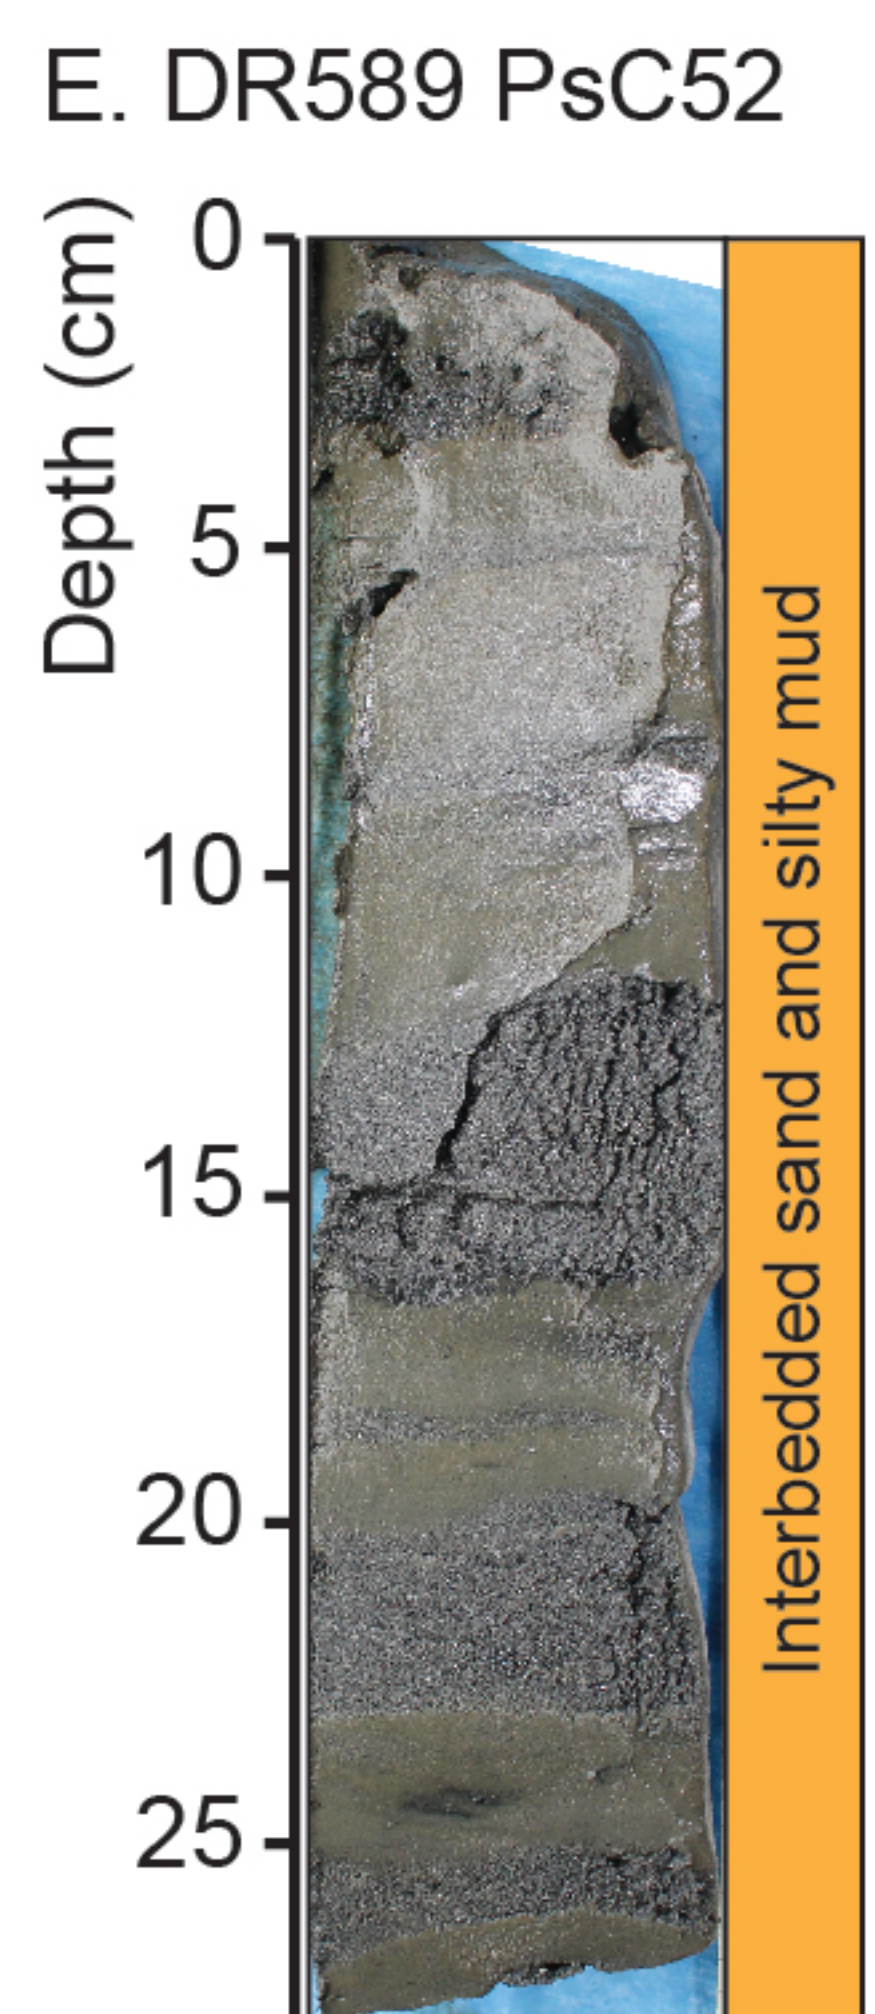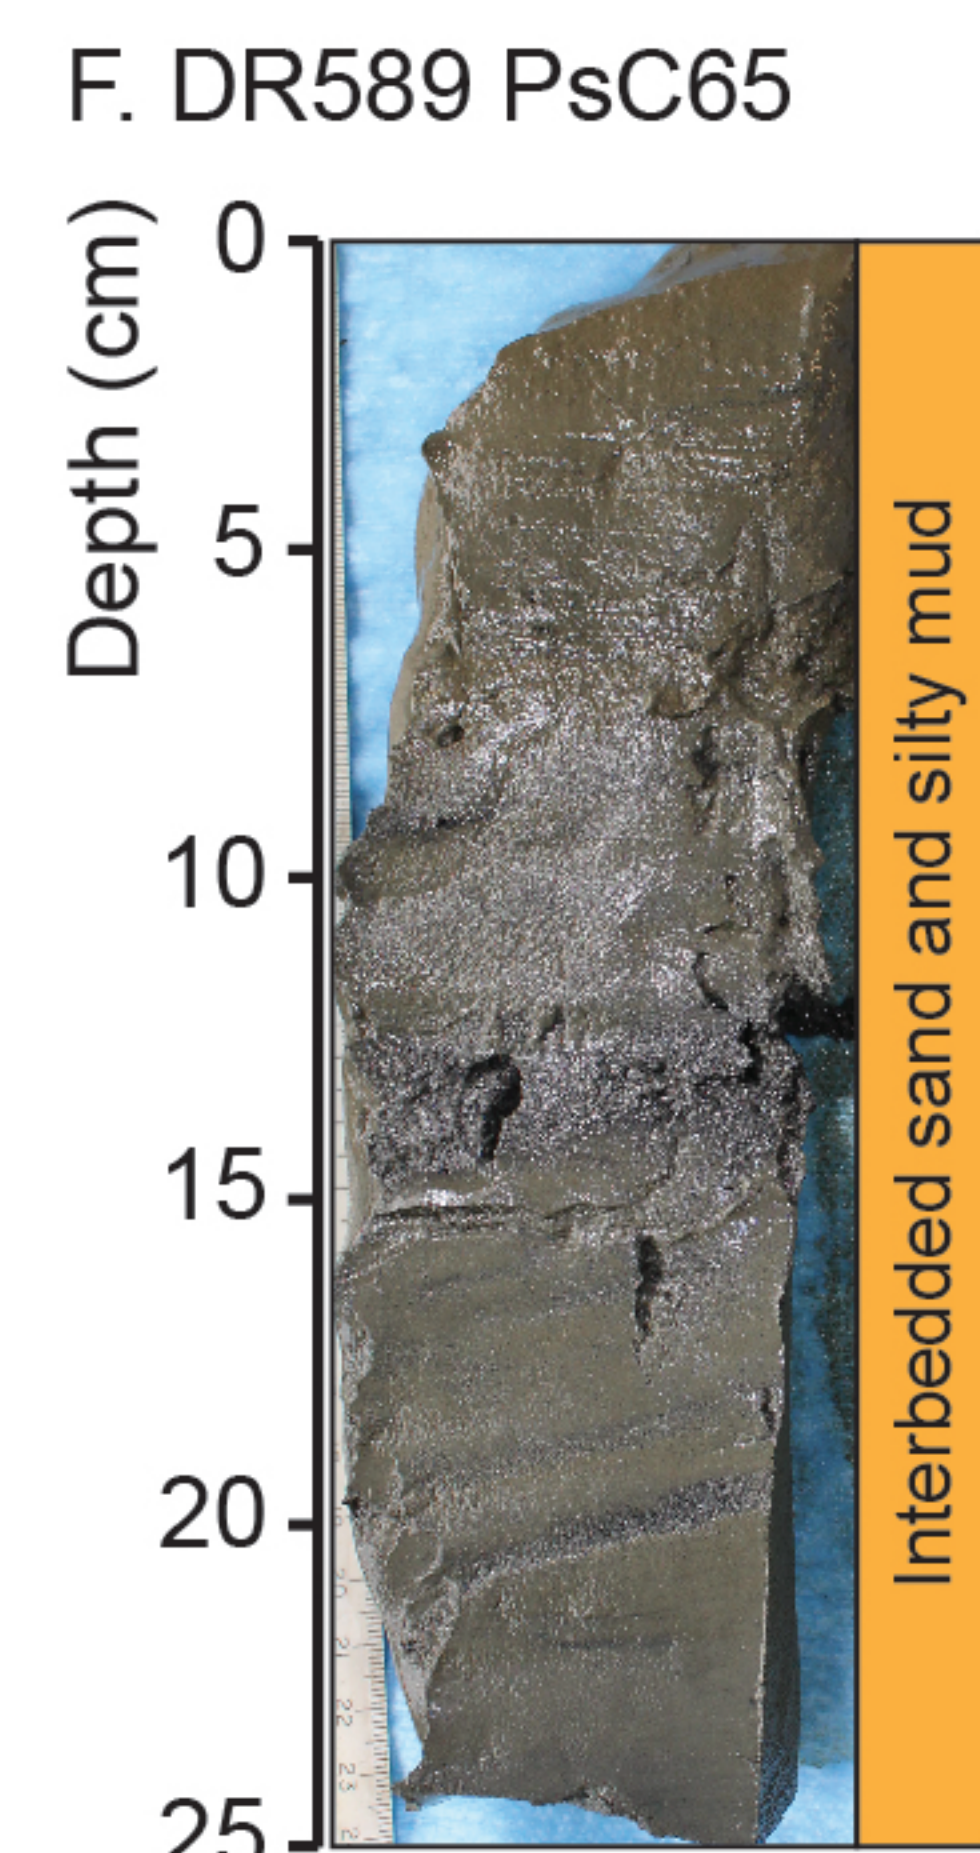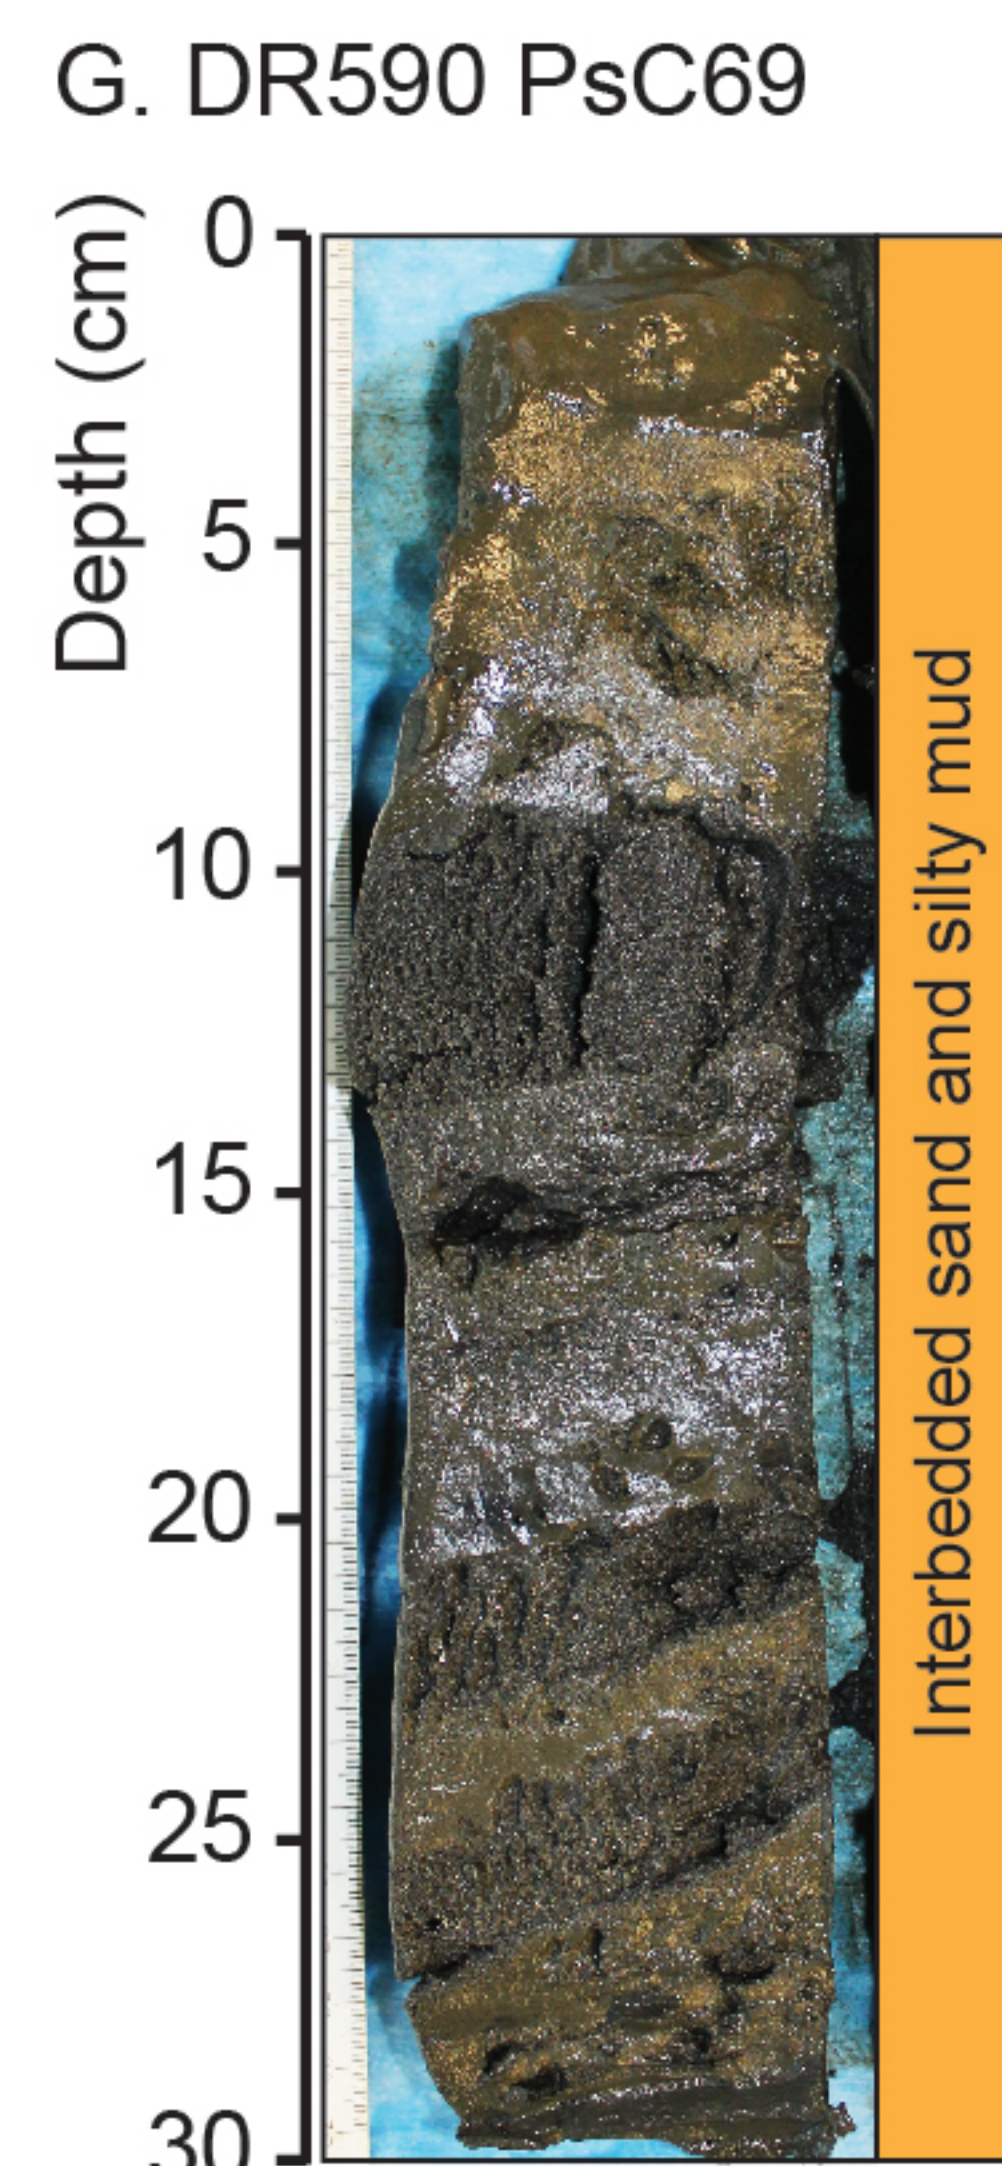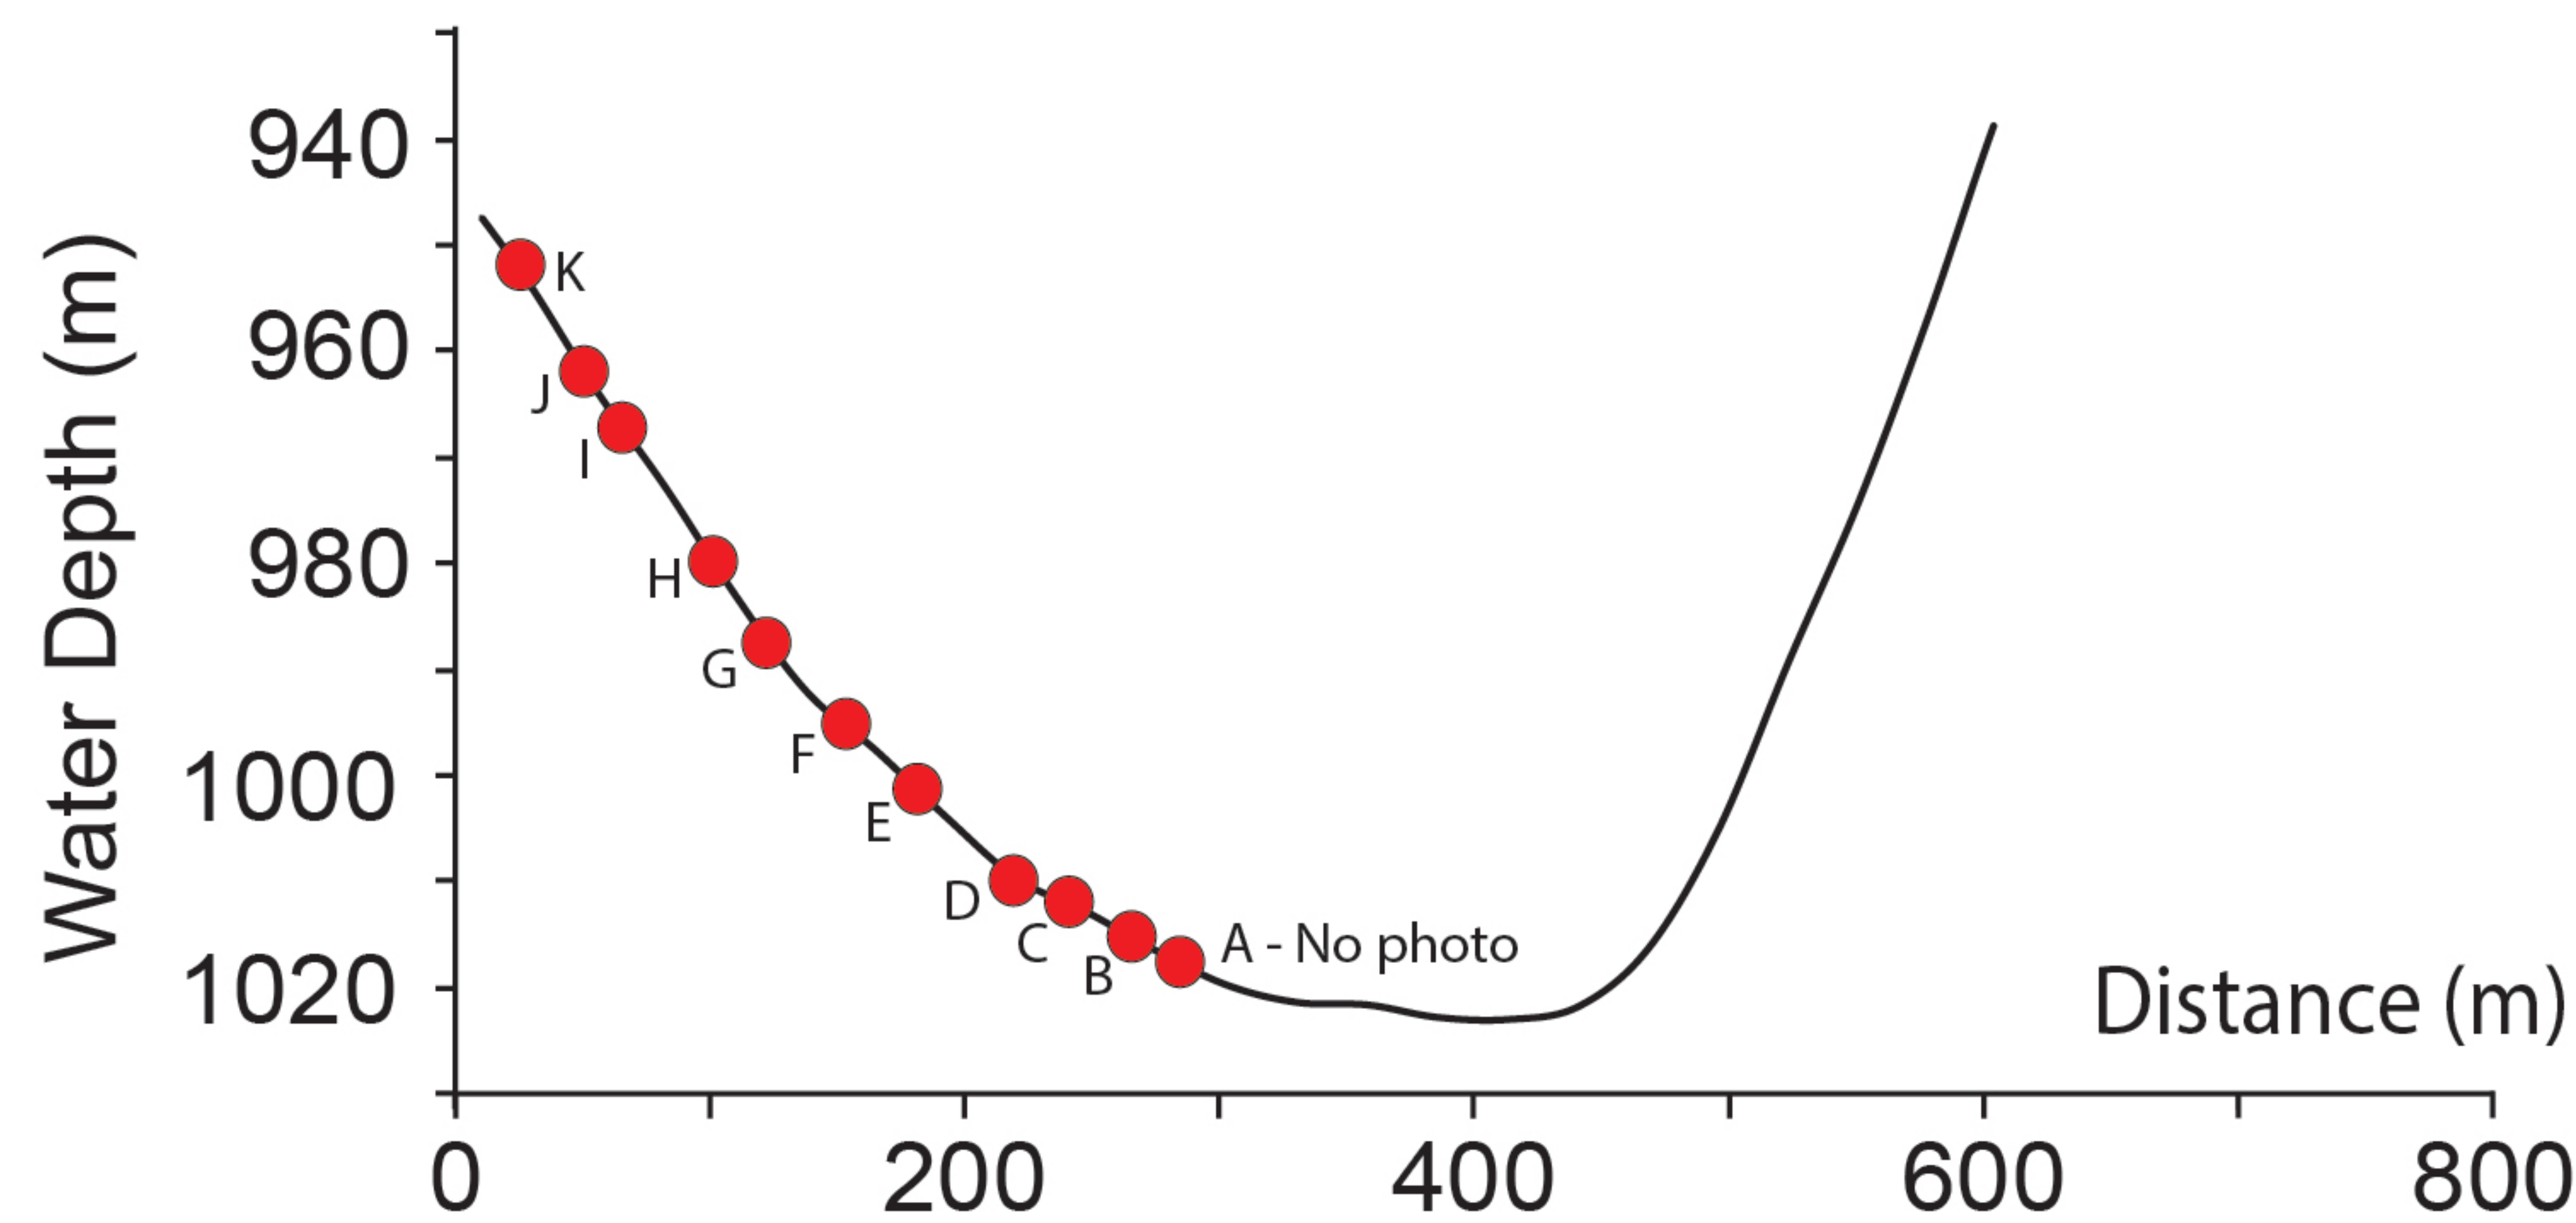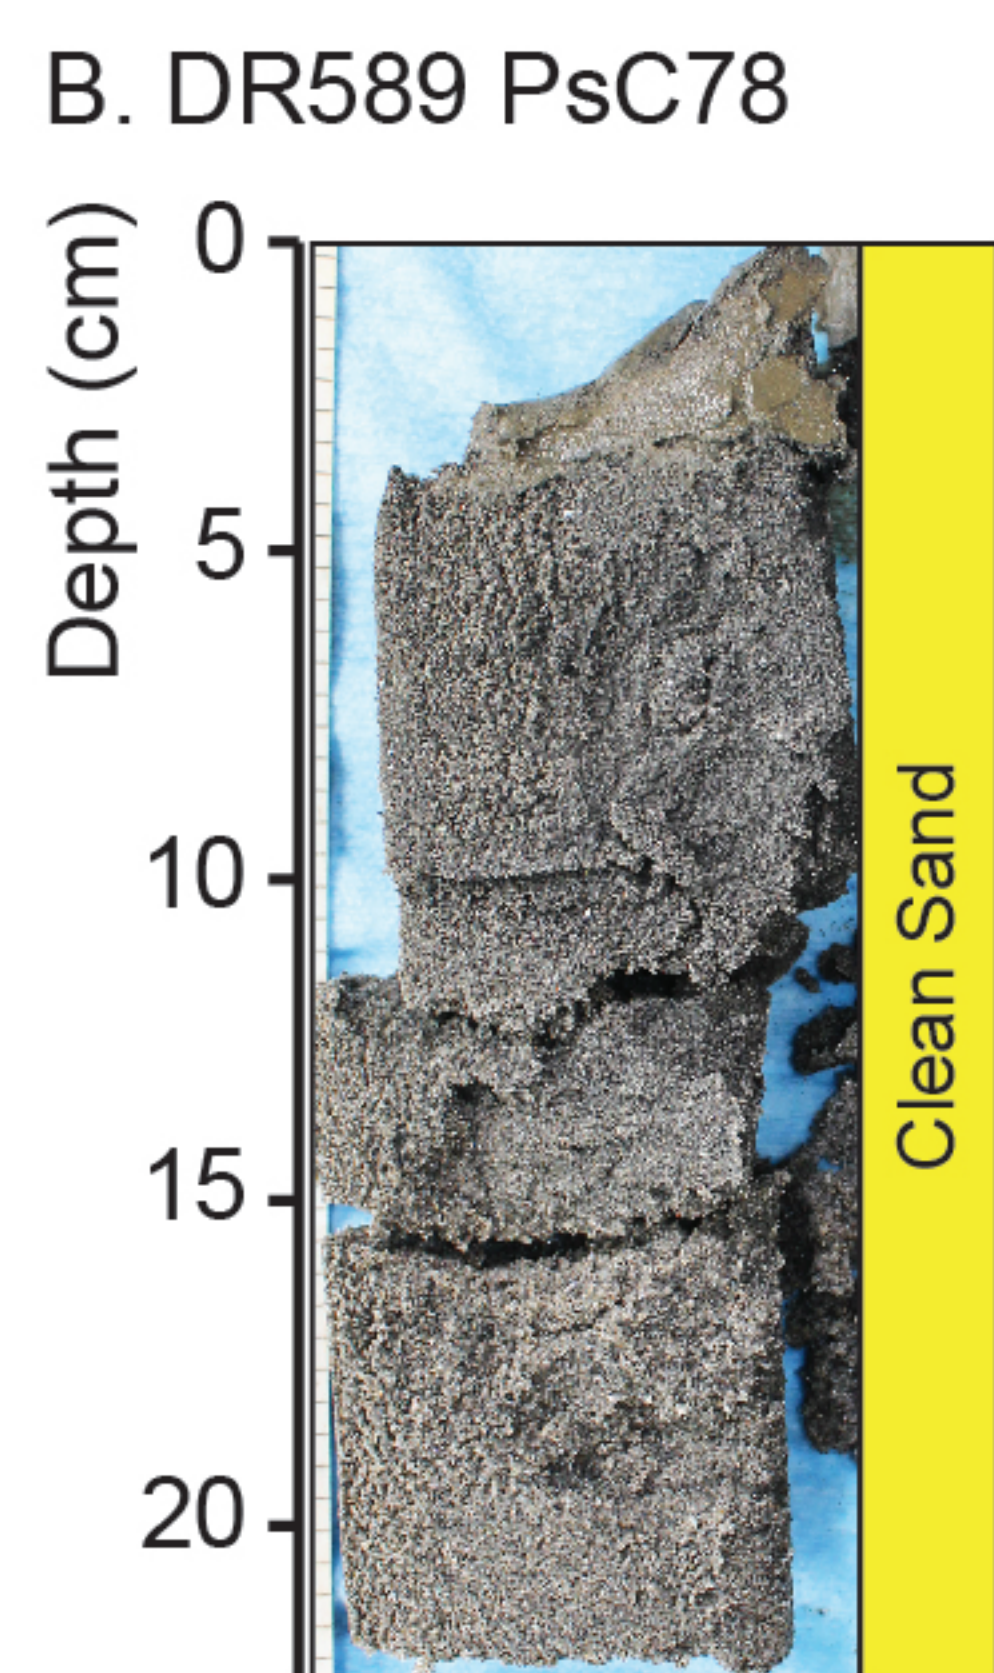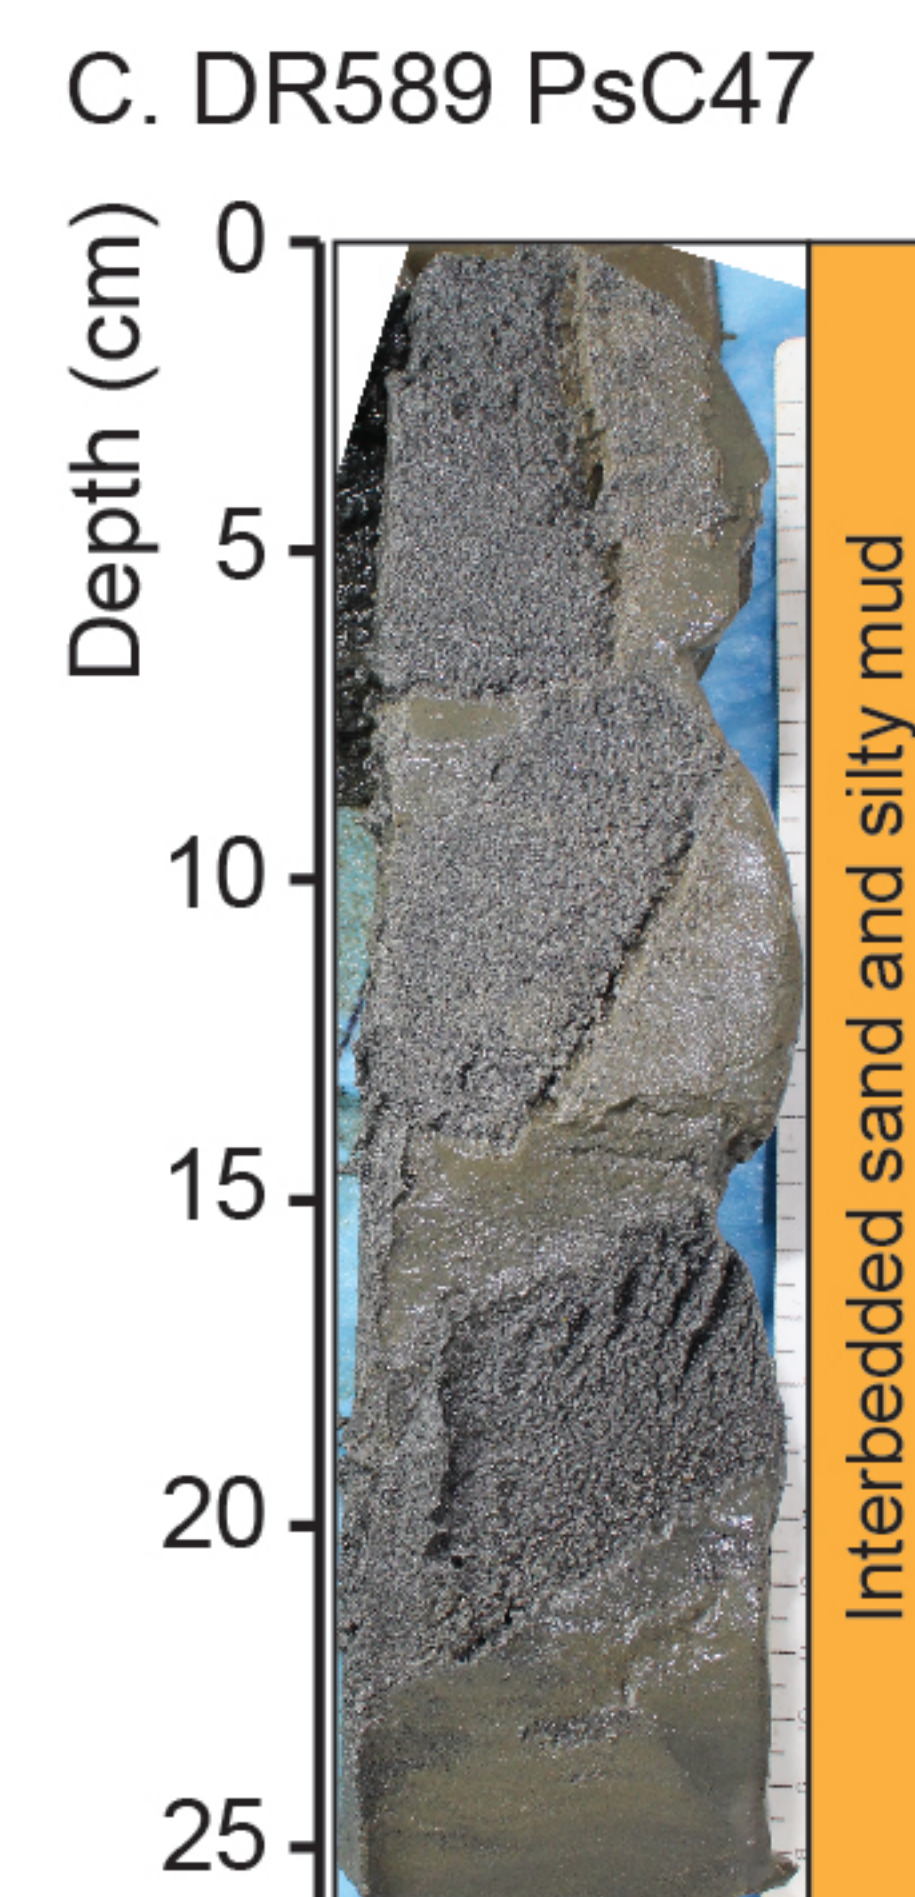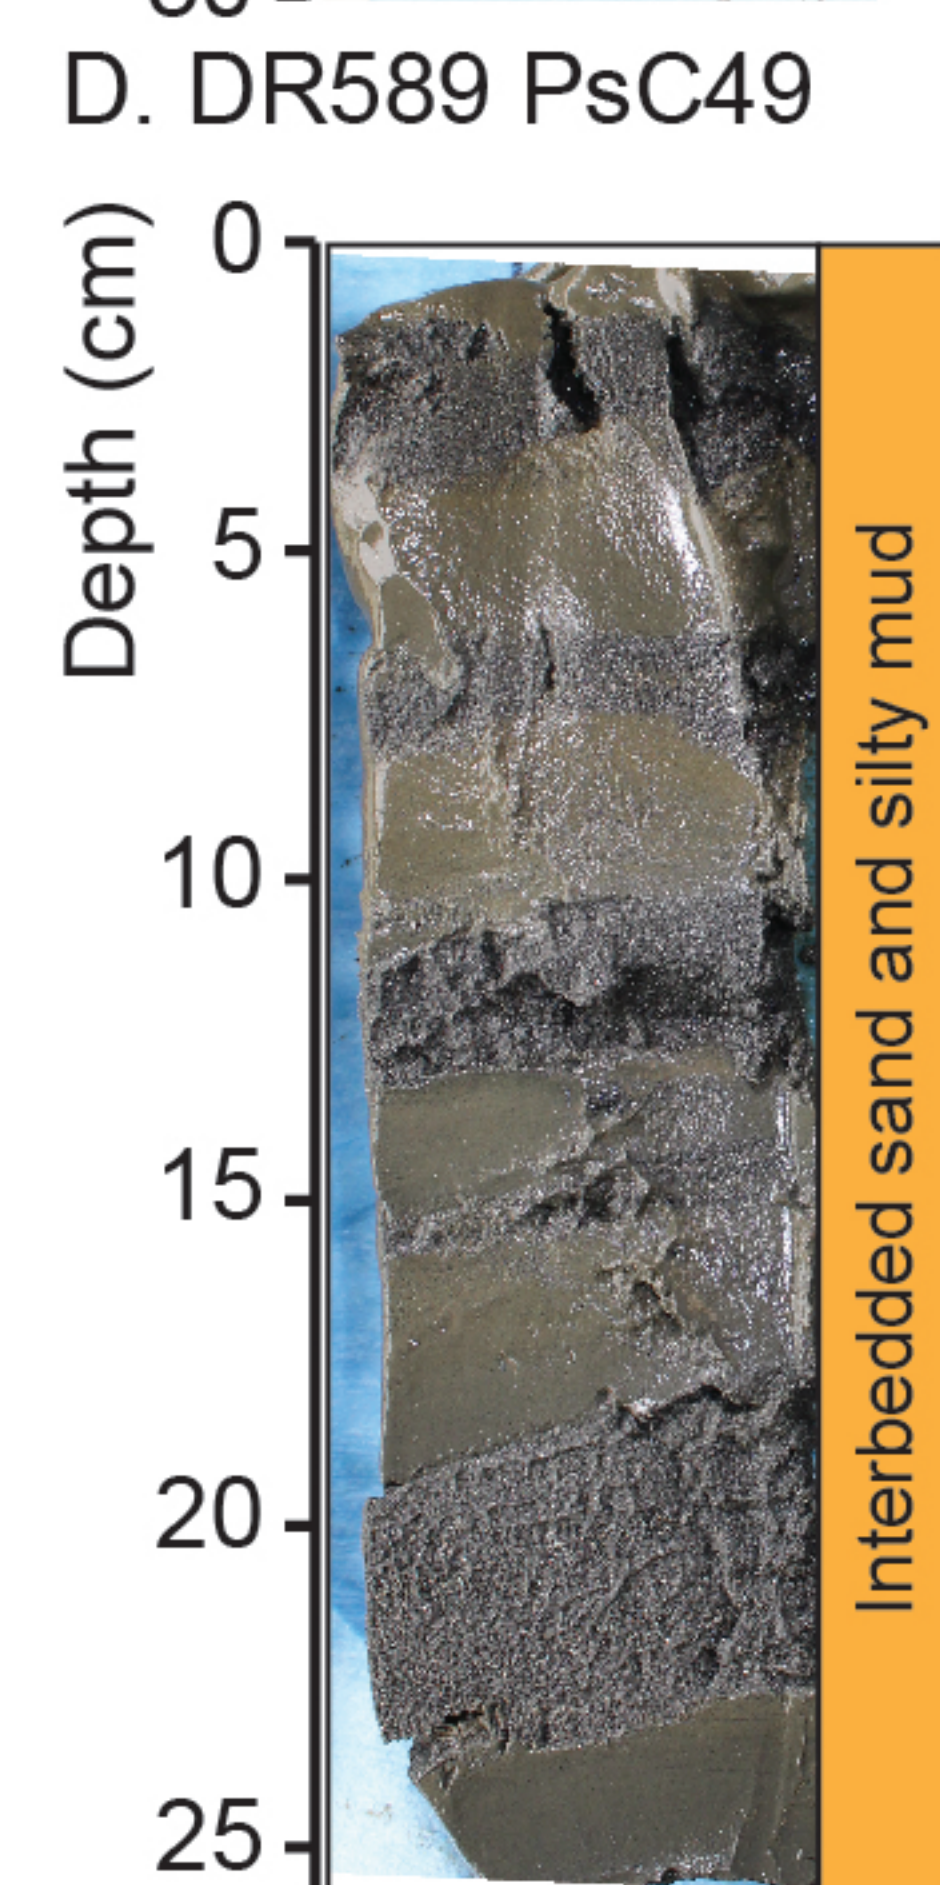

Fig DR7



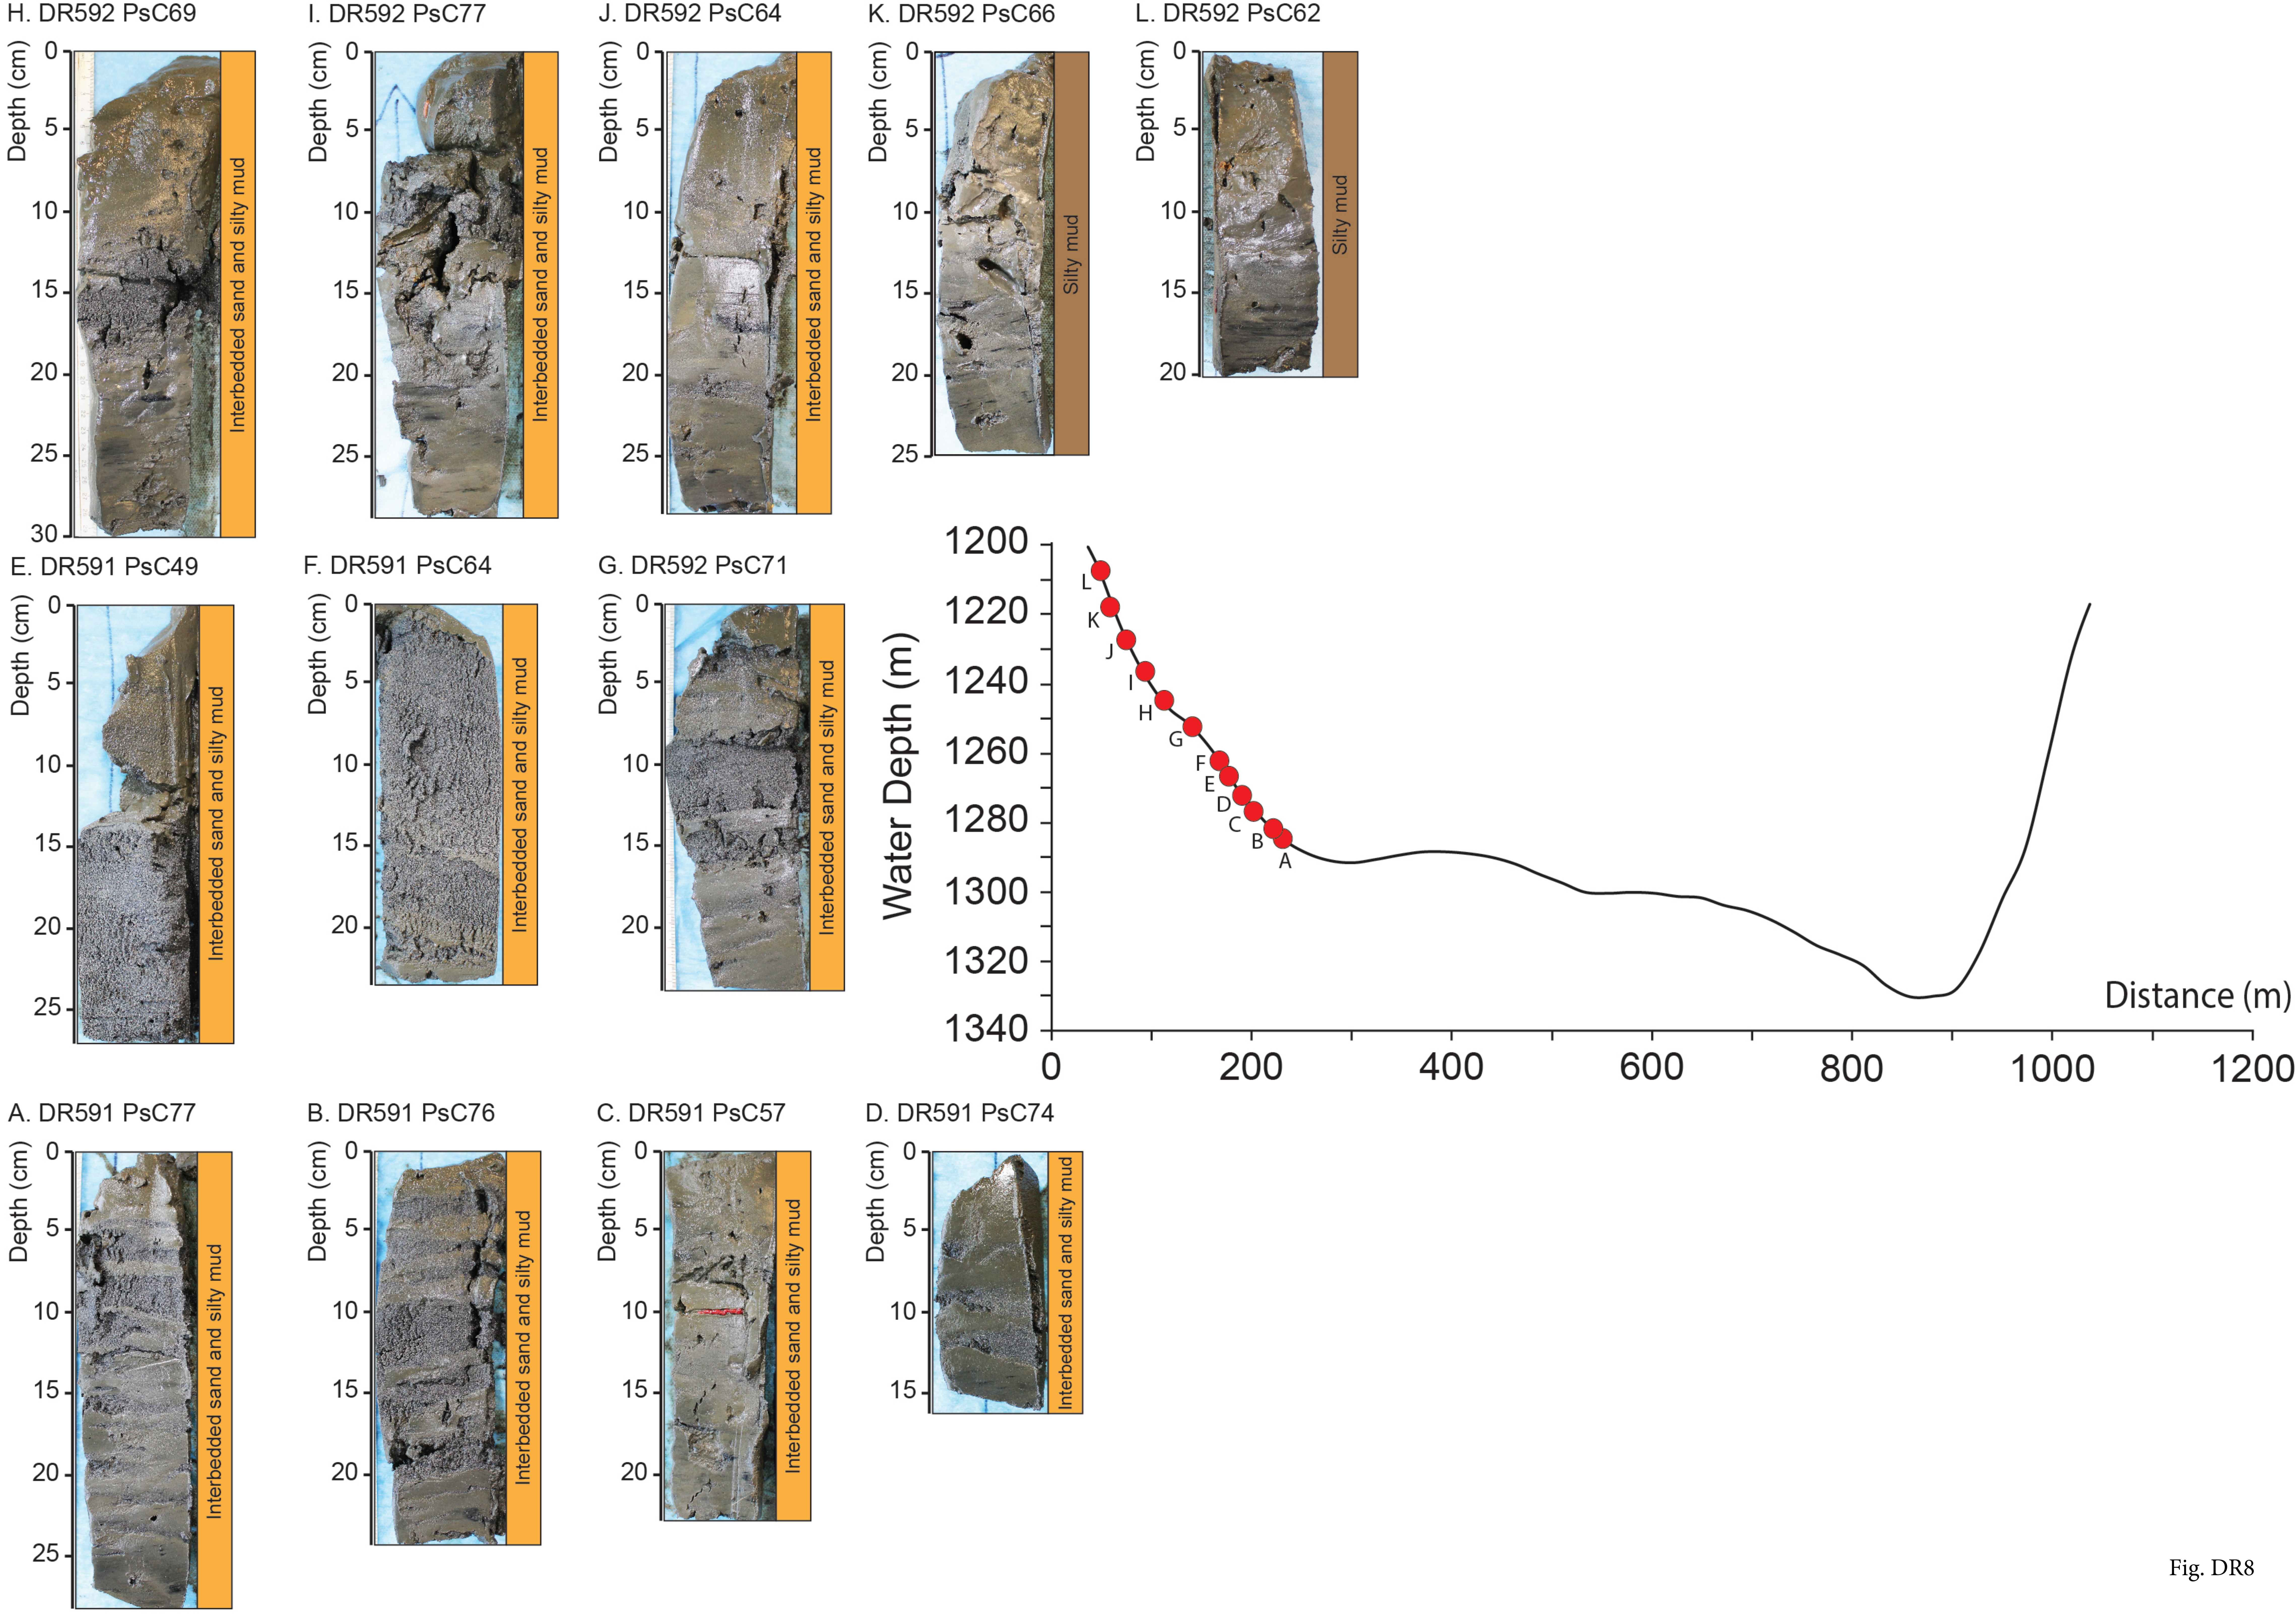

Fig. DR8



Fig. DR9

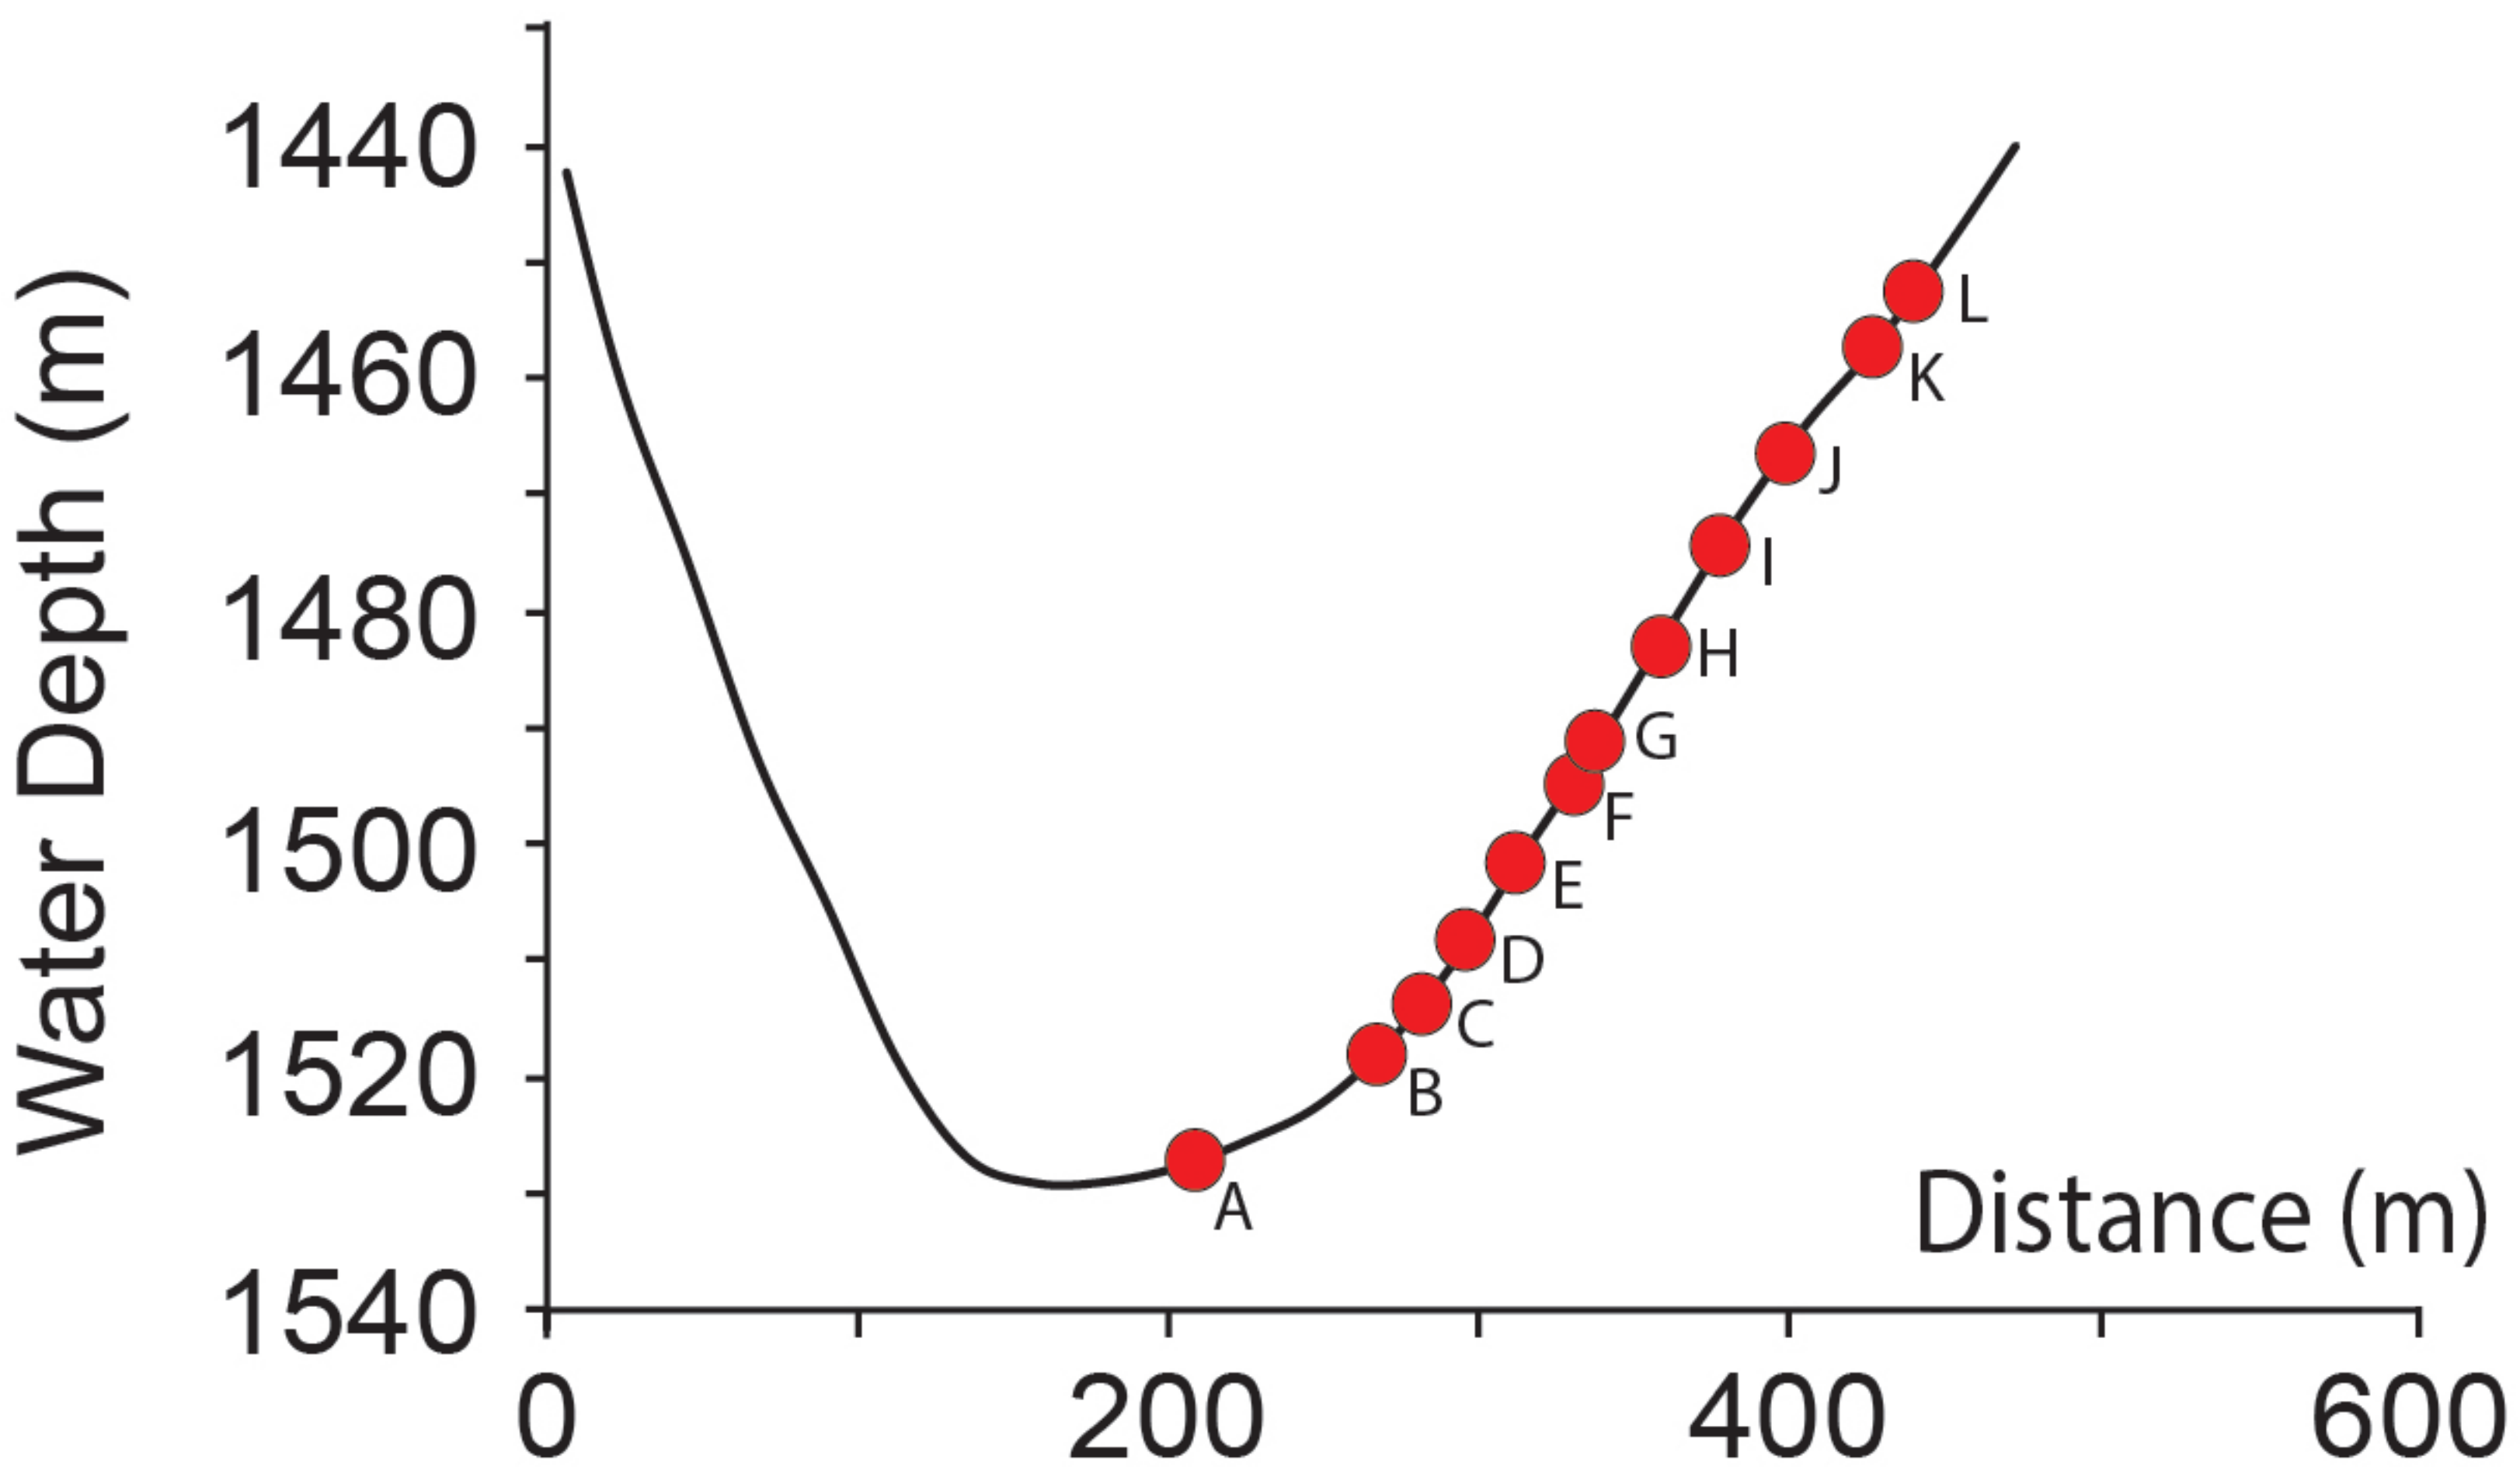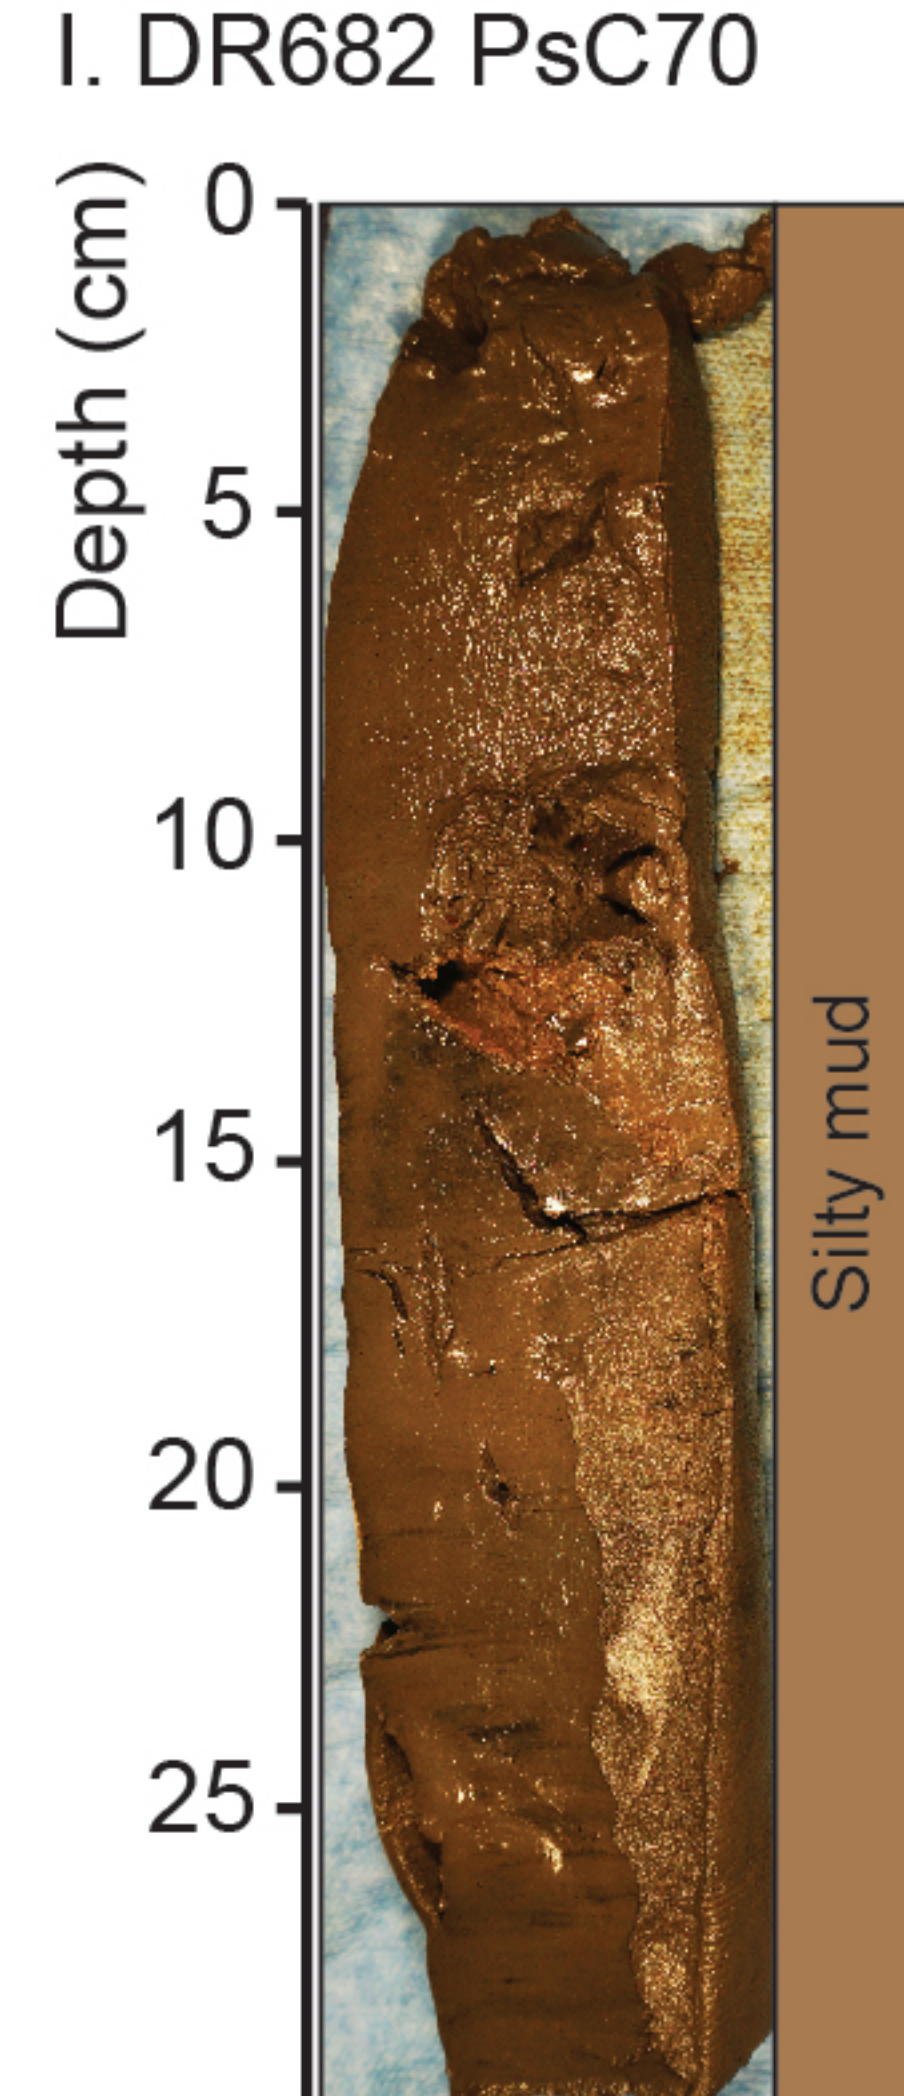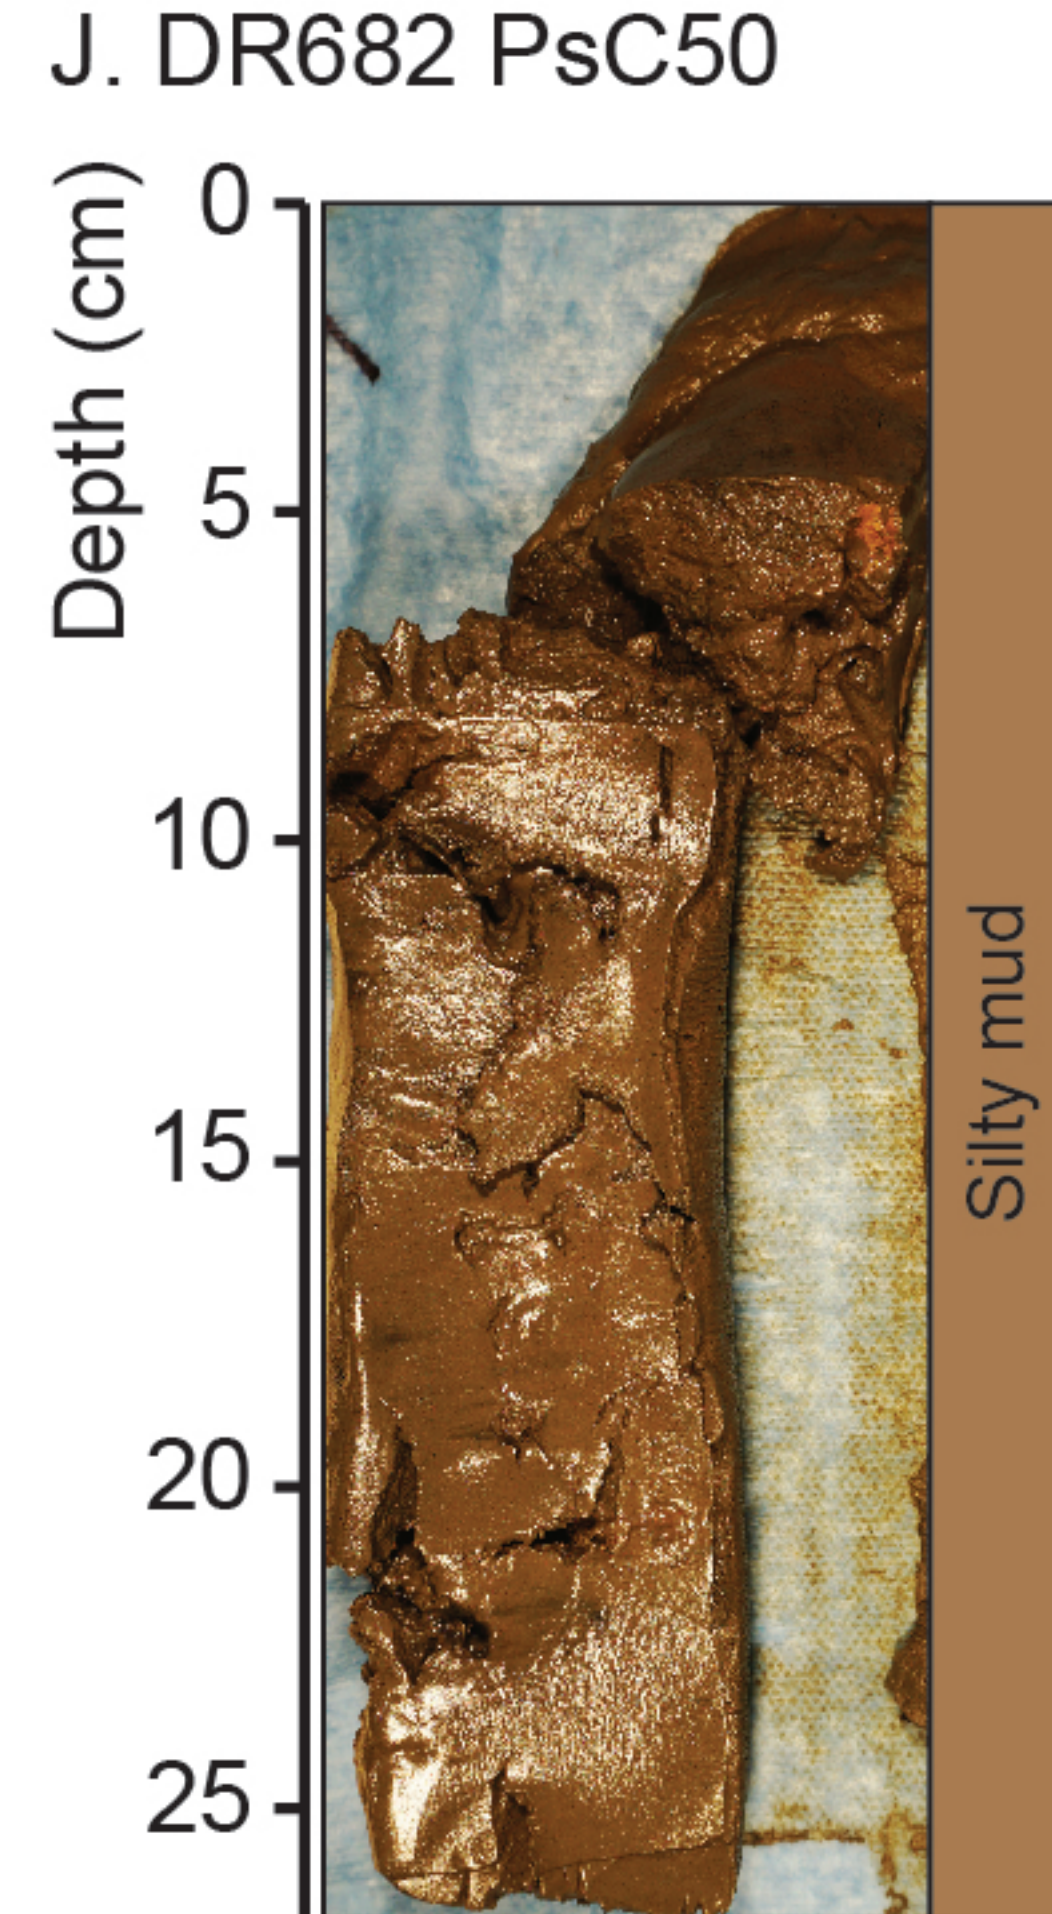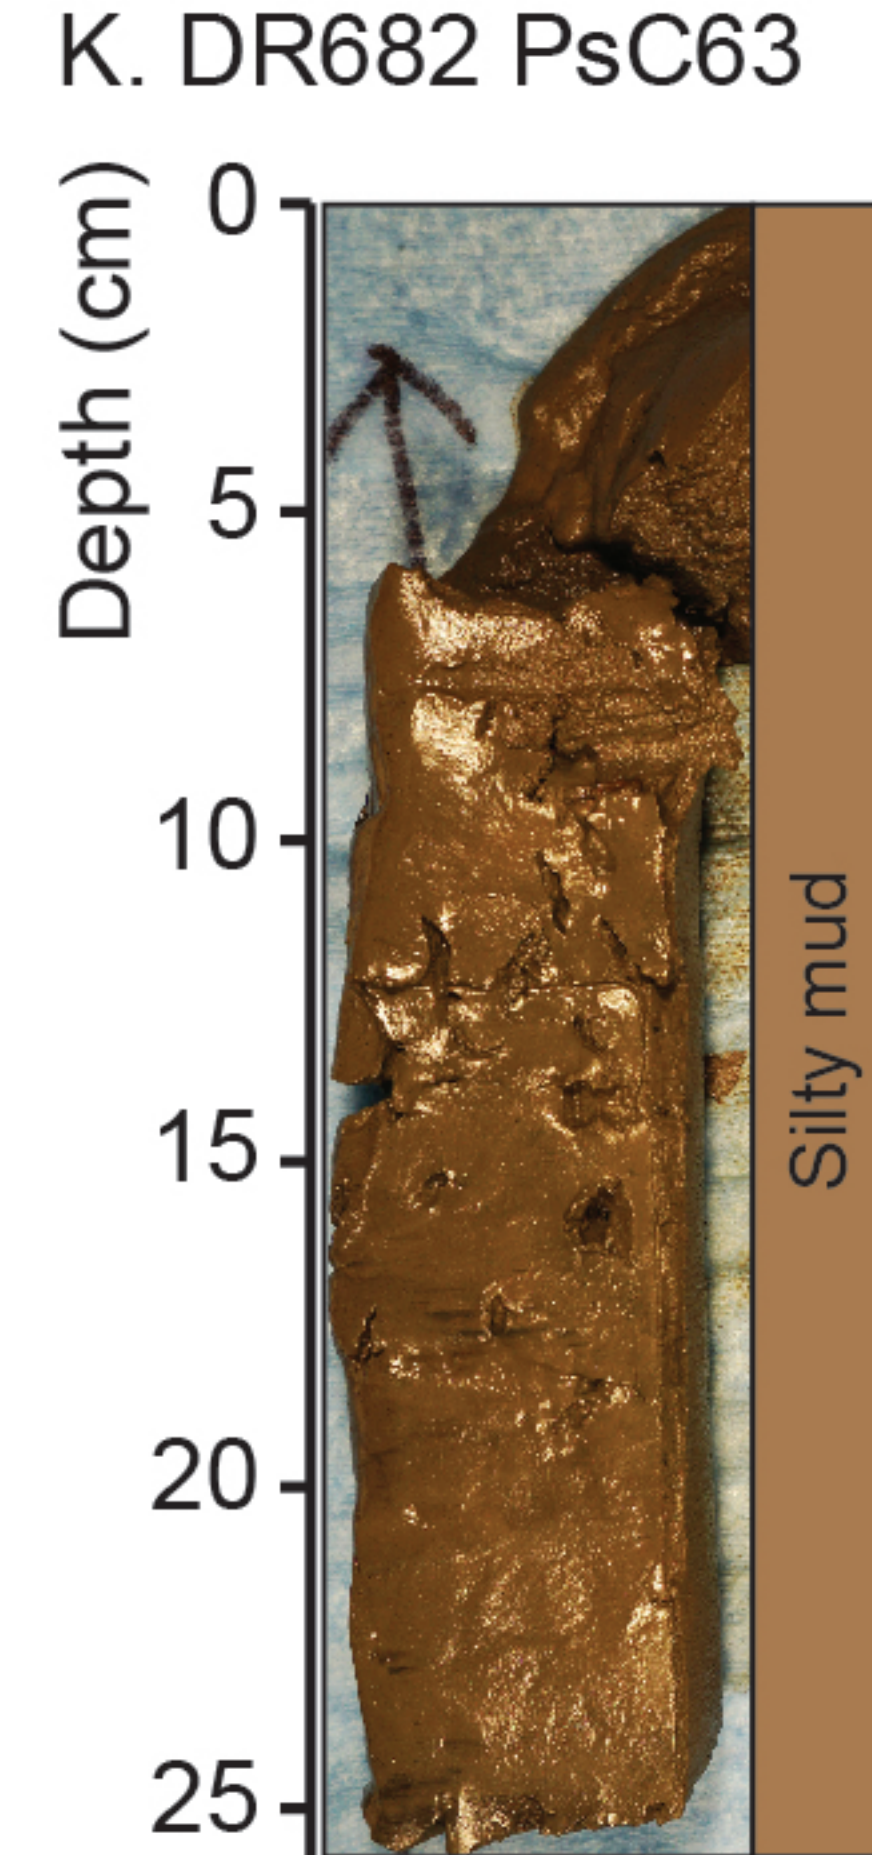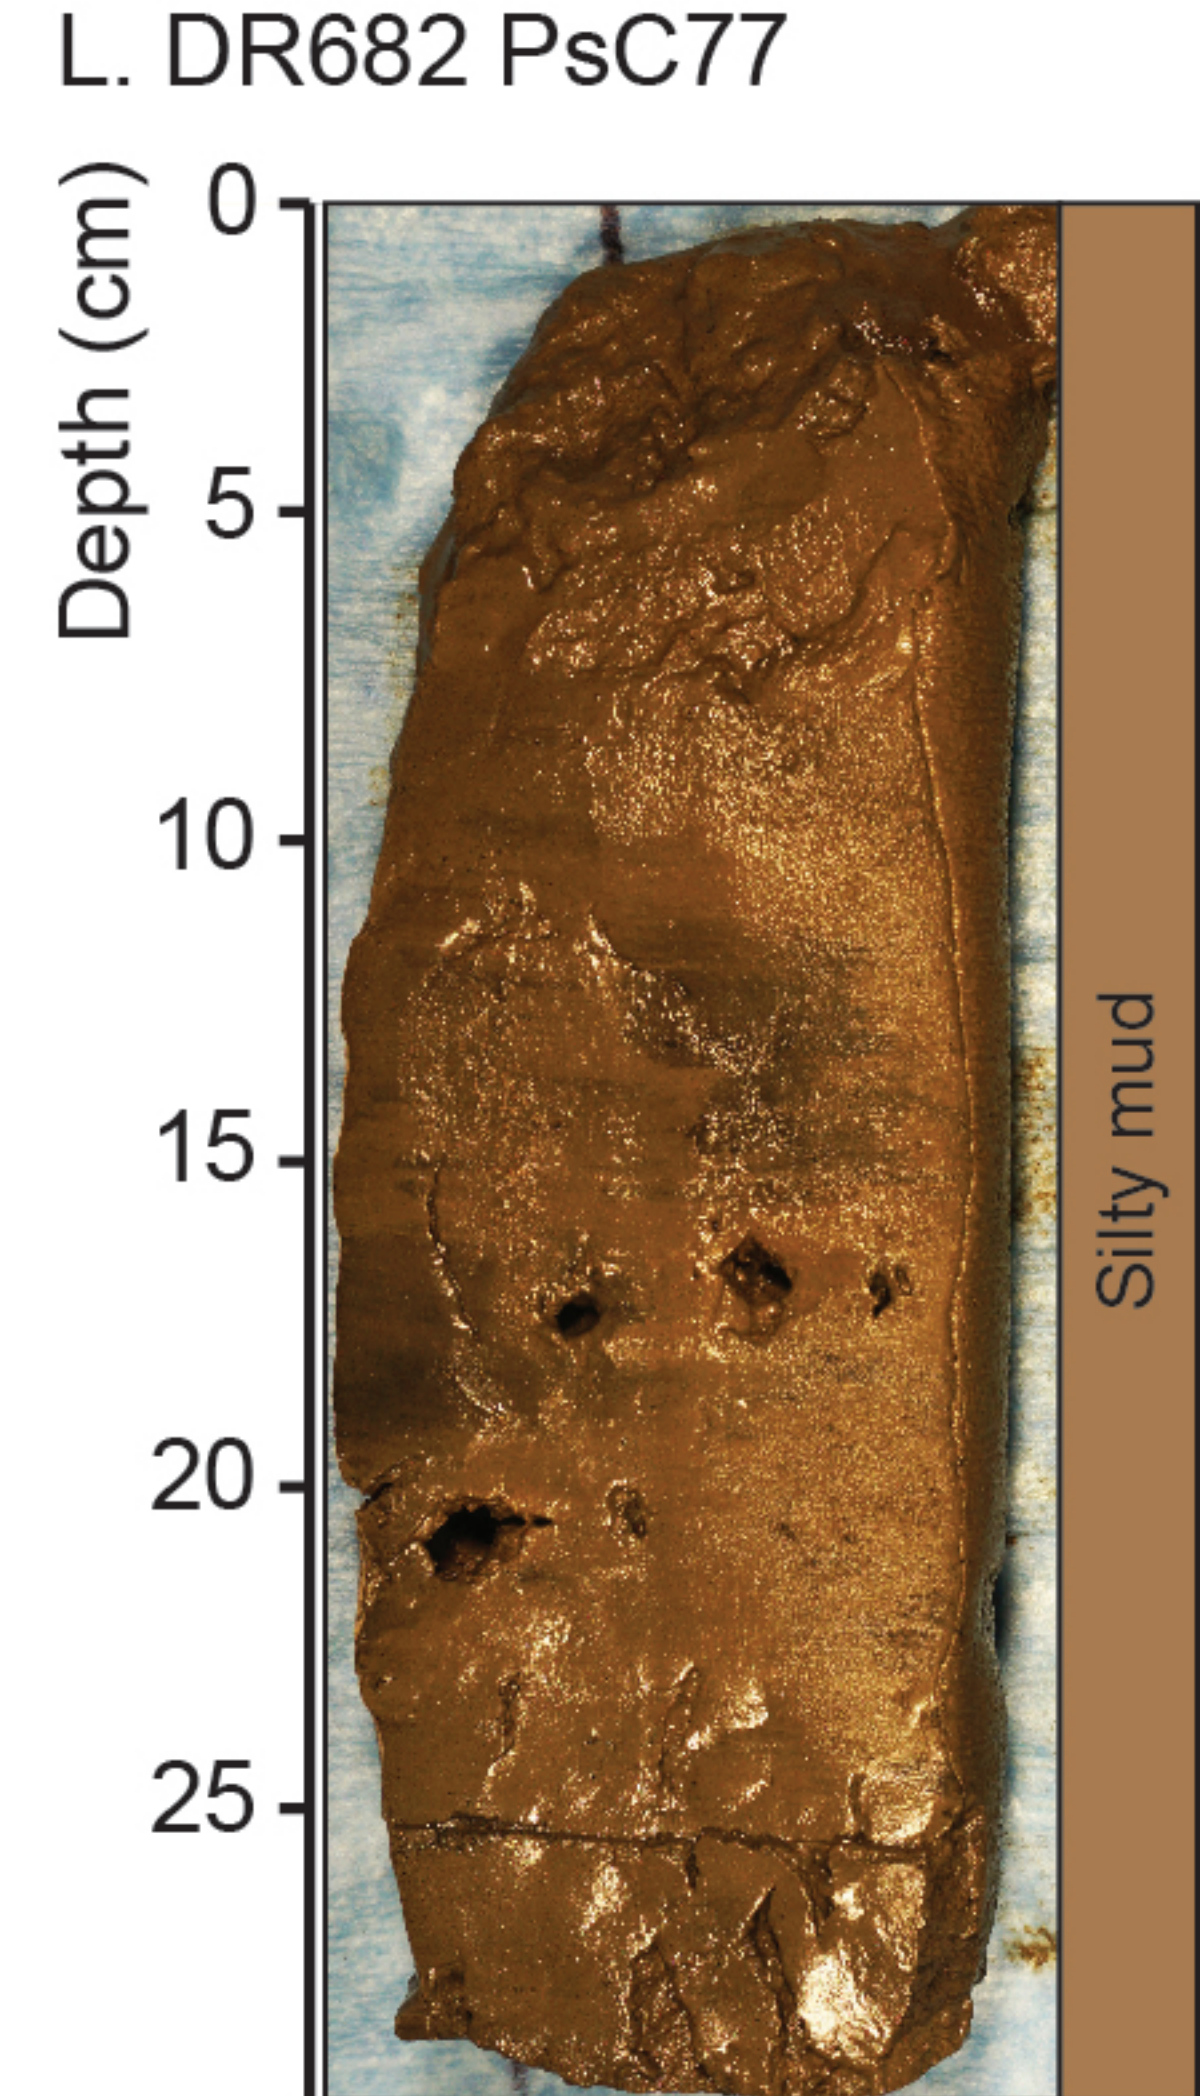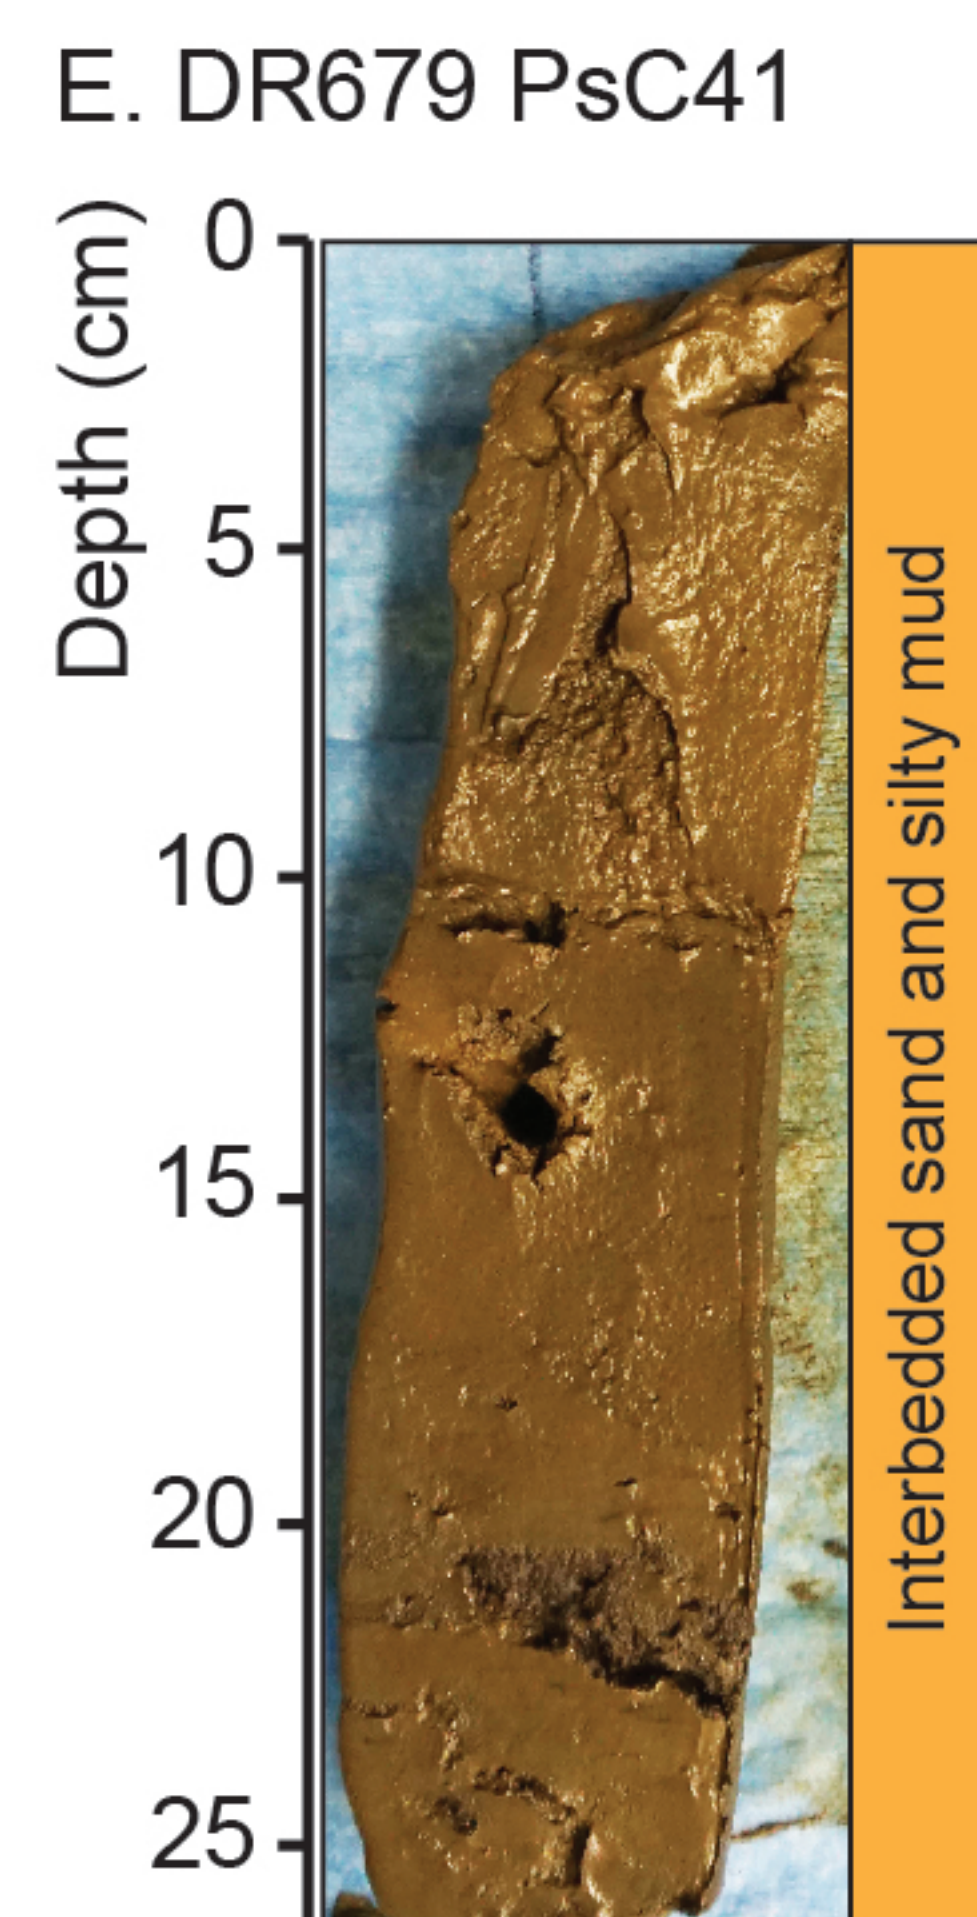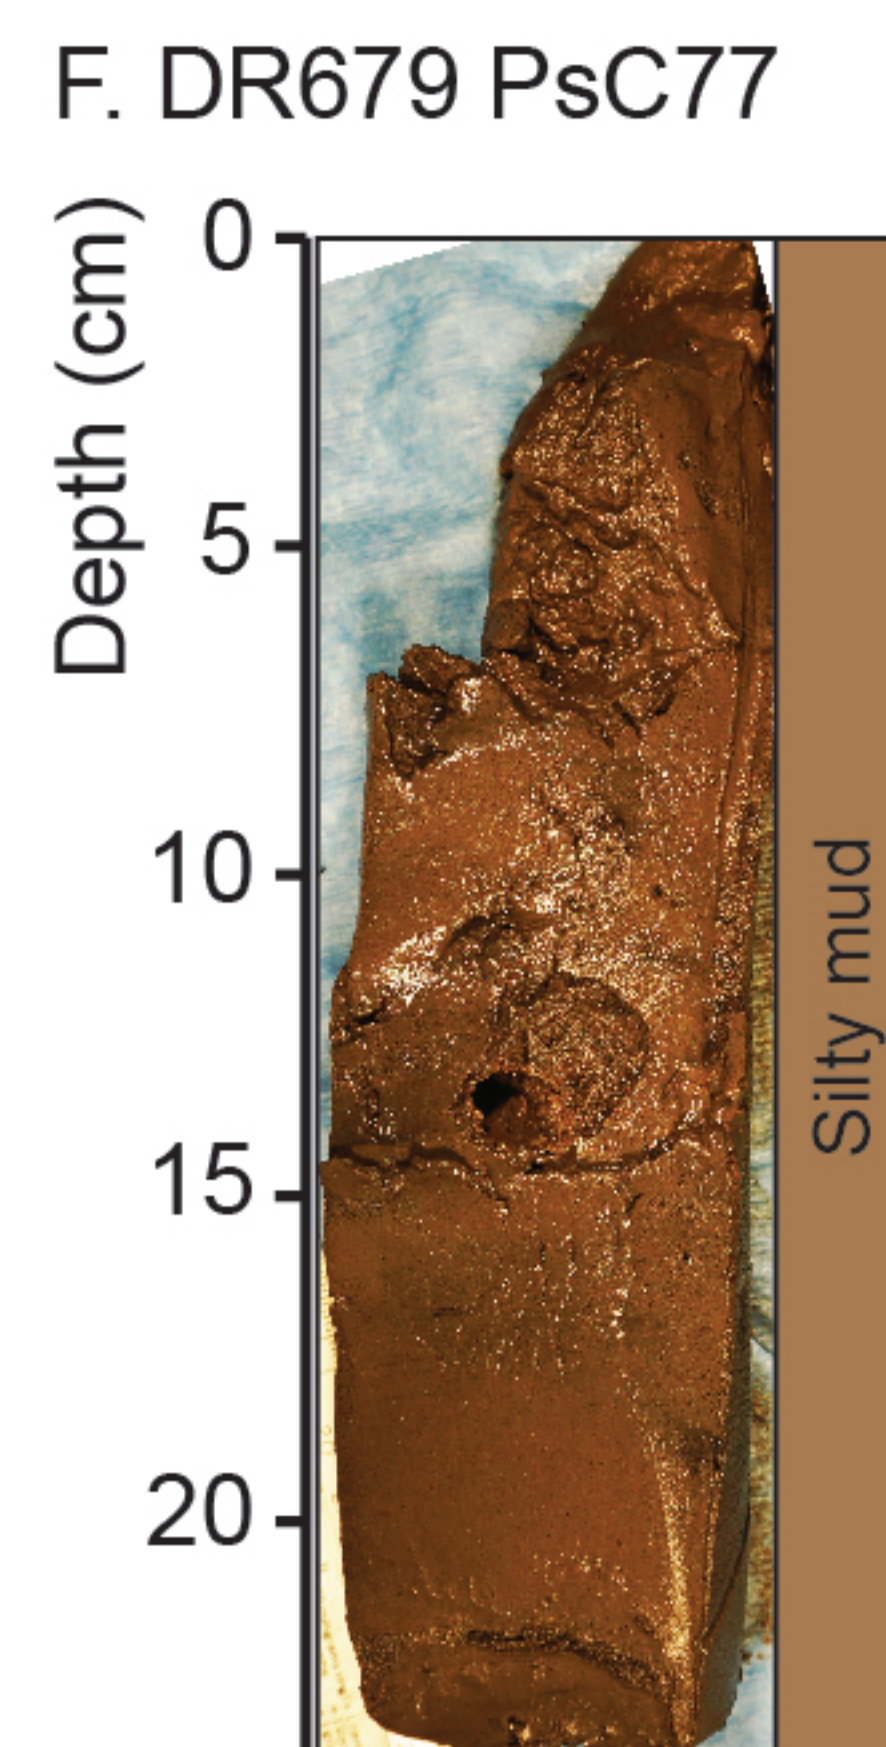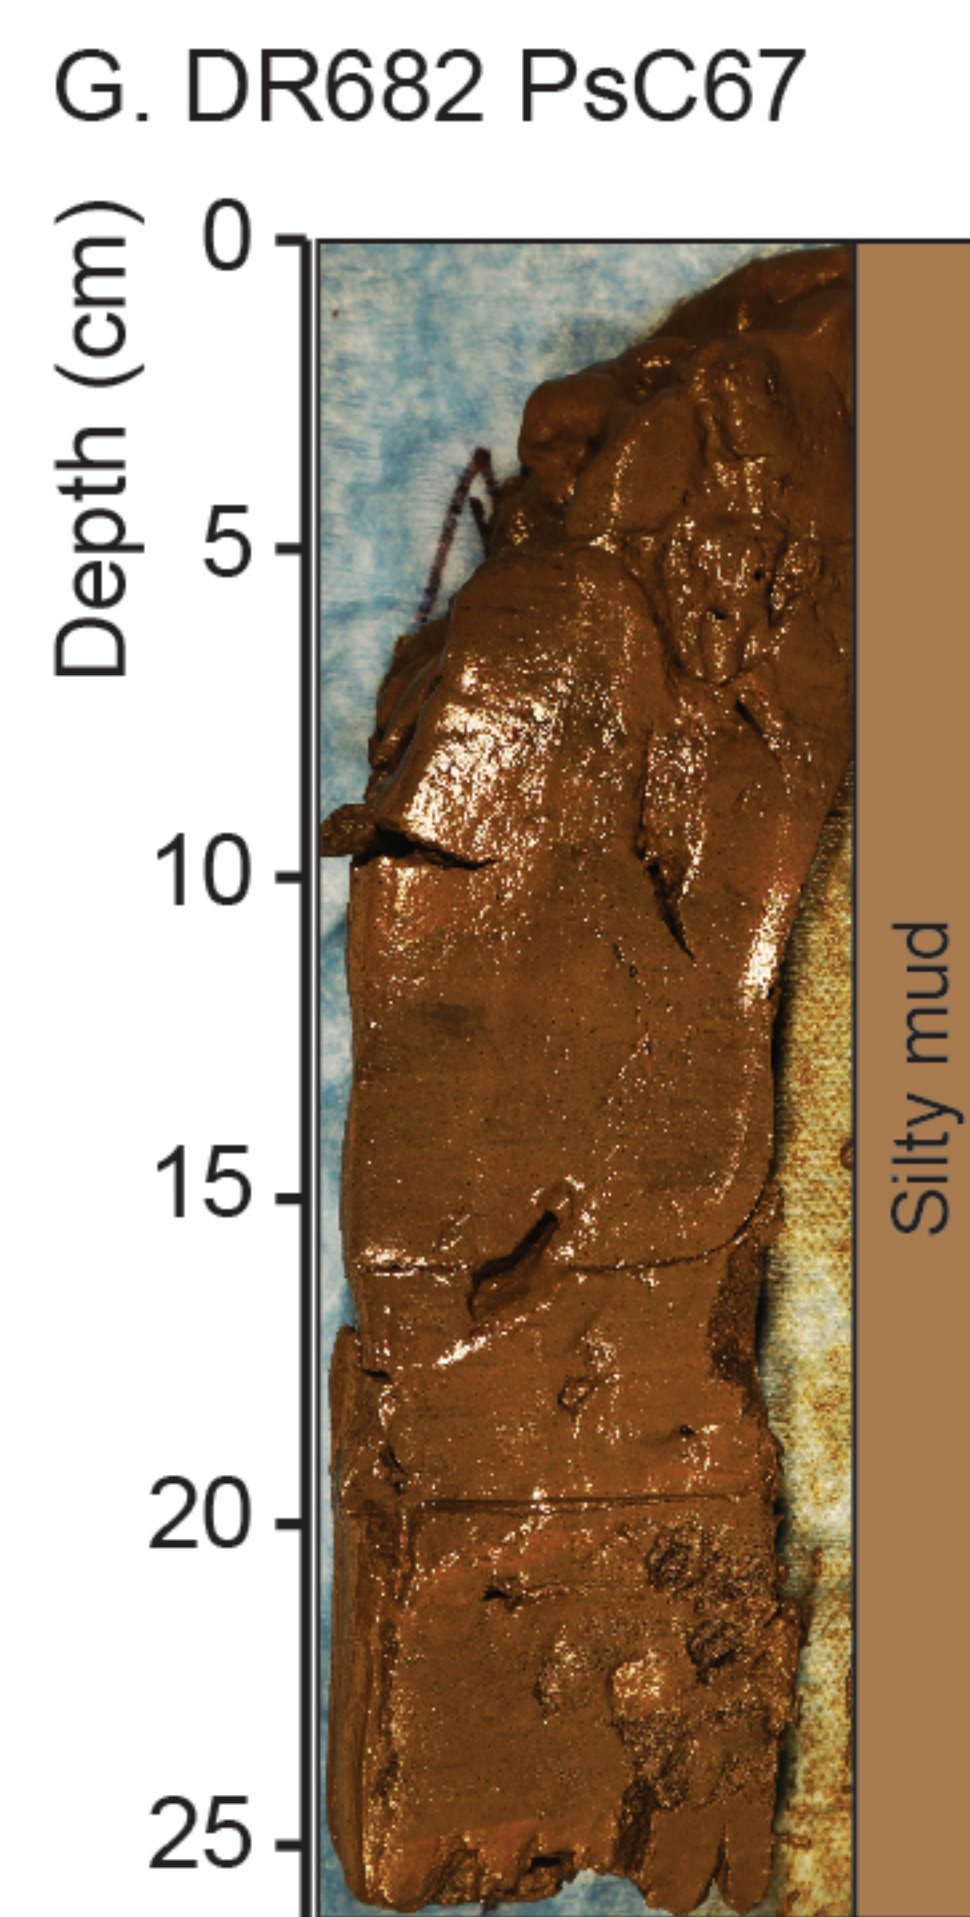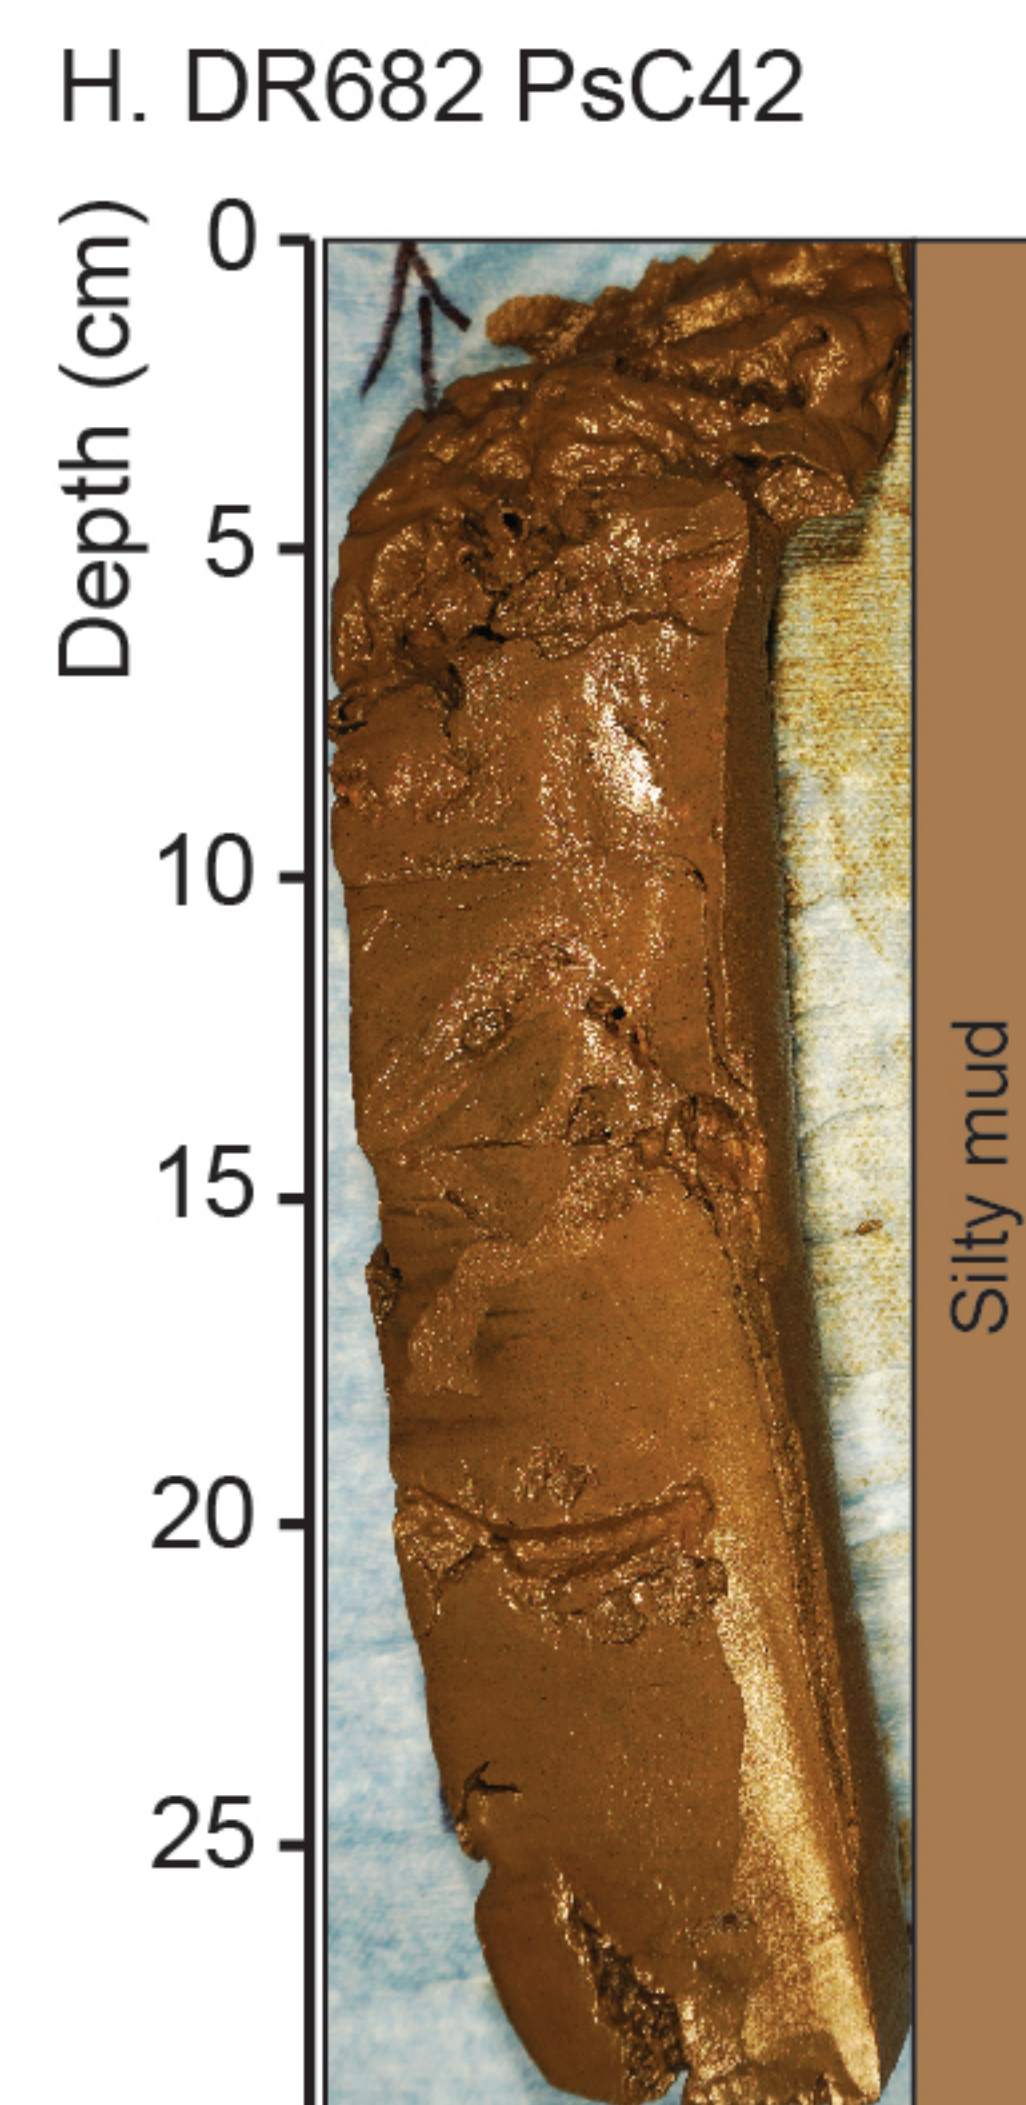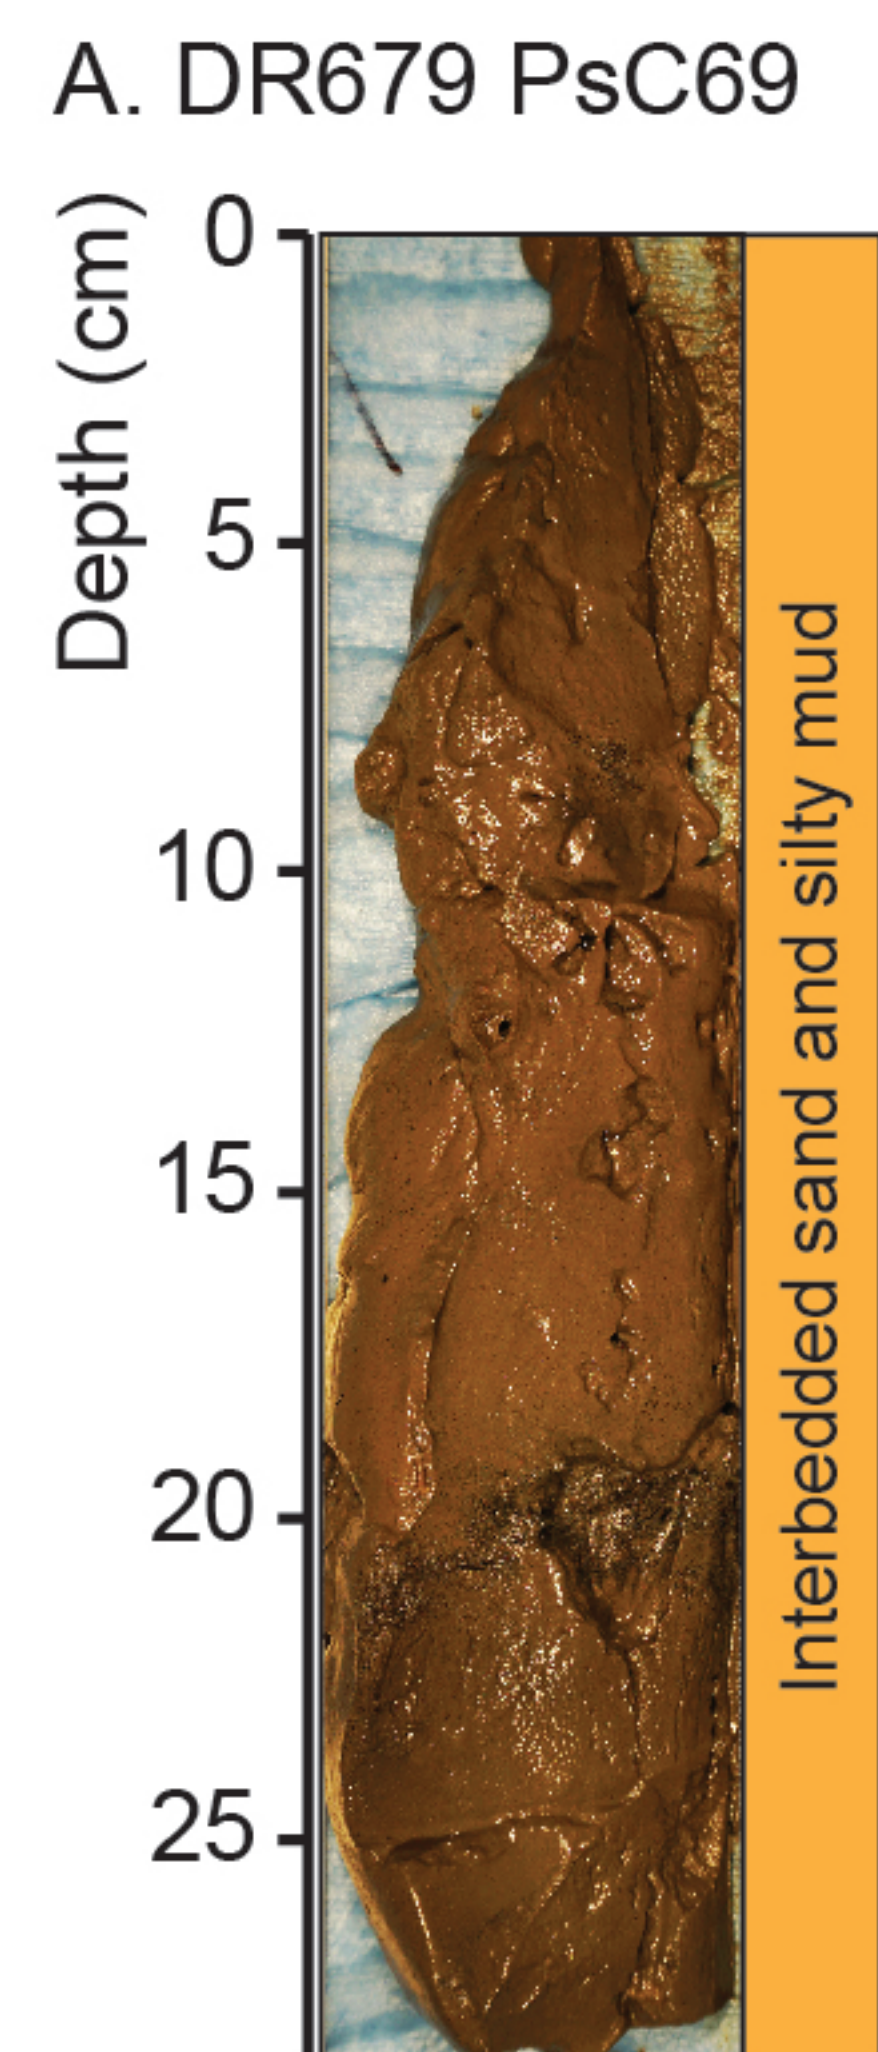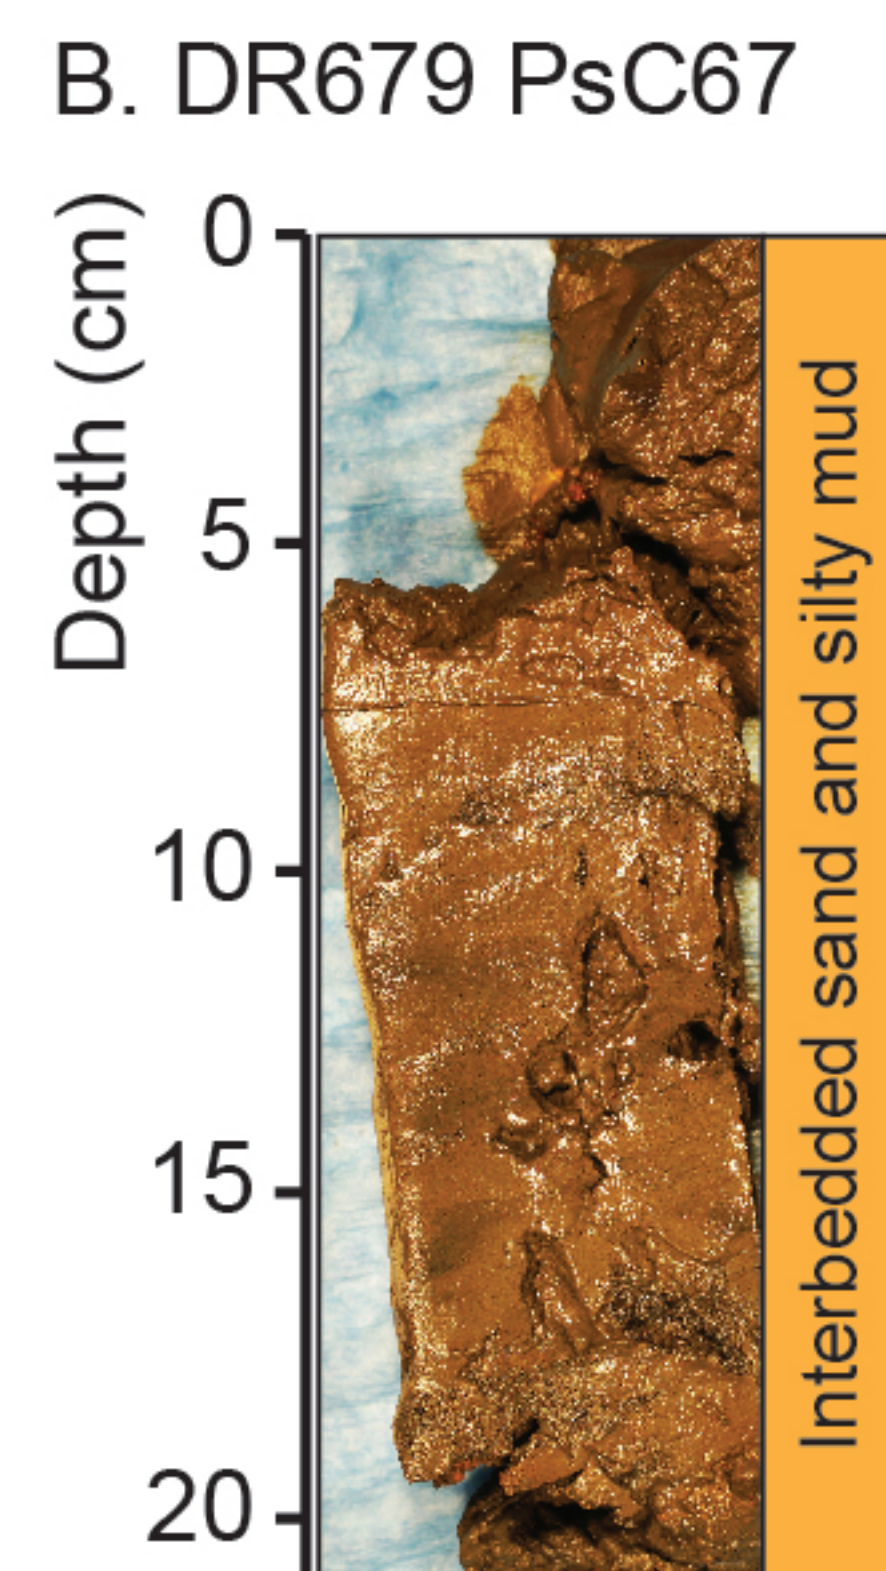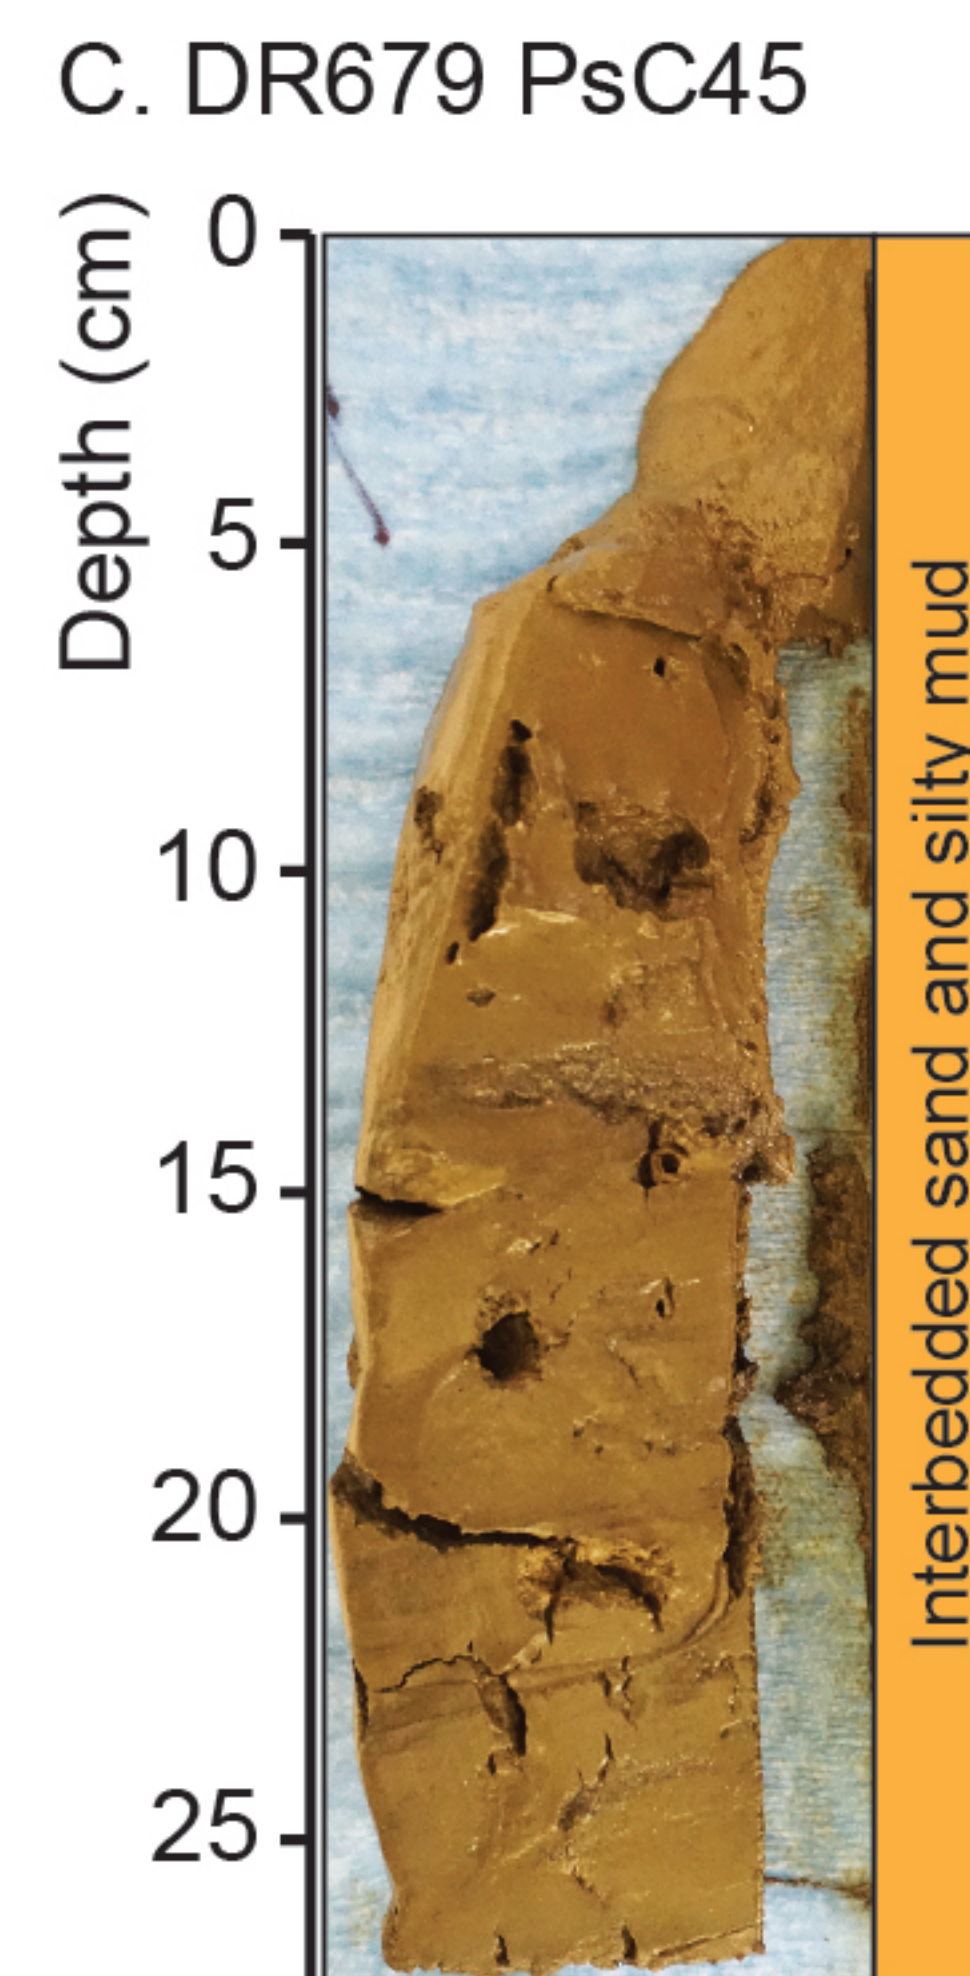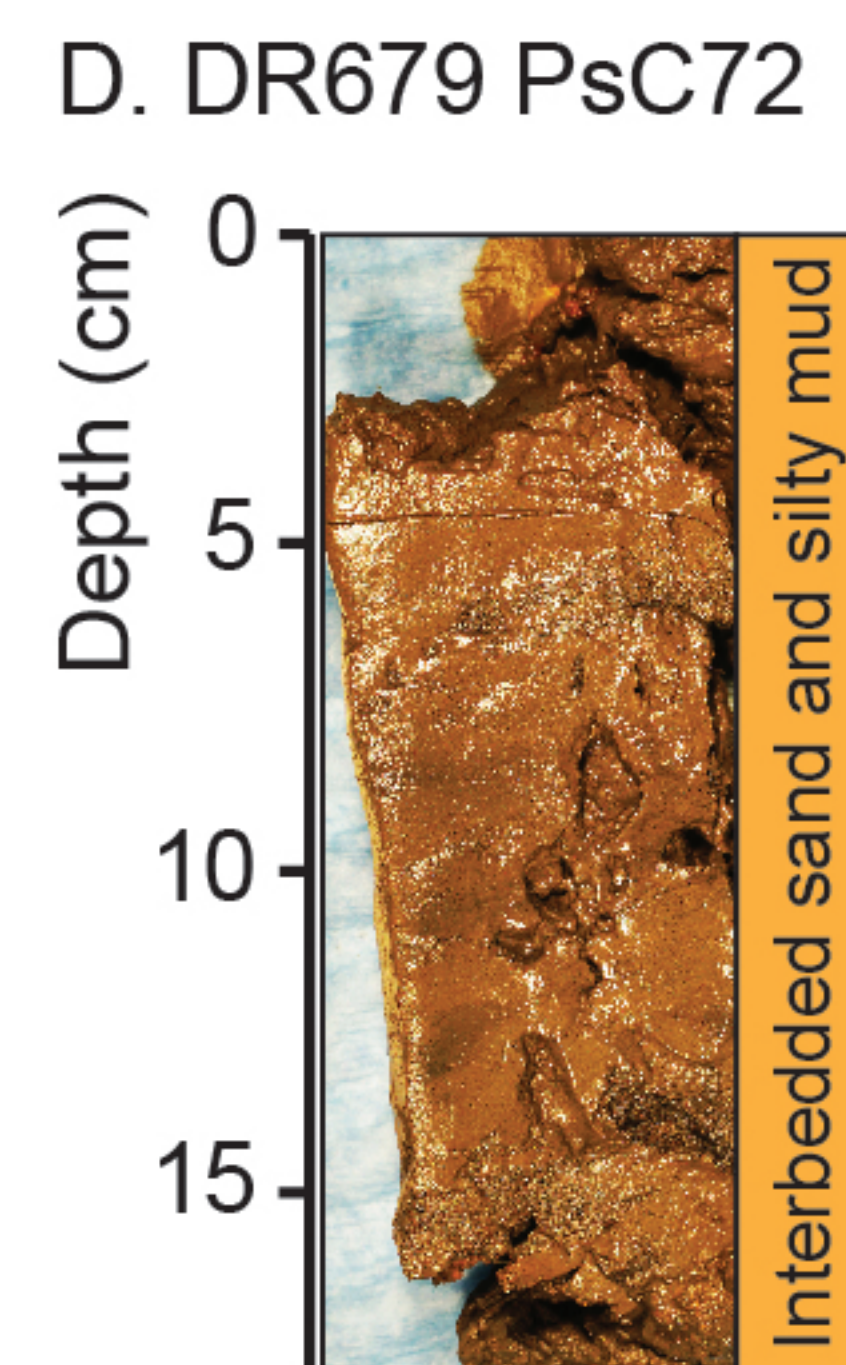



Table DR1: Detailed push core locations including transect associations and altitude.

| <b>Transect</b> | <b>Core number</b> | <b>Altitude (m)</b> | <b>Latitude</b> | <b>Longitude</b> |
|-----------------|--------------------|---------------------|-----------------|------------------|
| Tr1 north wall  | DR681 PsC 53       | 0.03                | 36.794487       | 121.844739       |
|                 | DR681 PsC 42       | 27.76               | 36.794934       | 121.844696       |
|                 | DR681 PsC 54       | 36.59               | 36.795153       | 121.844639       |
|                 | DR681 PsC 67       | 44.56               | 36.795684       | 121.844428       |
|                 | DR681 PsC 57       | 53.26               | 36.796102       | 121.844332       |
|                 | DR681 PsC 70       | 57.1                | 36.797717       | 121.843964       |
| Tr1 south wall  | DR683 PsC 57       | 0.01                | 36.792304       | 121.845408       |
|                 | DR683 PsC 63       | 6.85                | 36.792202       | 121.845399       |
|                 | DR683 PsC 58       | 30.59               | 36.791763       | 121.845488       |
|                 | DR683 PsC 75       | 41.3                | 36.791545       | 121.845518       |
|                 | DR683 PsC 42       | 51.15               | 36.791294       | 121.845608       |
|                 | DR683 PsC 52       | 62.19               | 36.79068        | 121.845698       |
| Tr2 north wall  | DR677 PsC 78       | 0.01                | 36.788592       | 121.902991       |
|                 | DR677 PsC 54       | 7.76                | 36.788581       | 121.903618       |
|                 | DR677 PsC 43       | 17.07               | 36.788658       | 121.904332       |
|                 | DR677 PsC 70       | 30.77               | 36.788602       | 121.904764       |
|                 | DR678 PsC 43       | 46.14               | 36.788549       | 121.90533        |
|                 | DR678 PsC 78       | 59.45               | 36.788628       | 121.906063       |
|                 | DR678 PsC 72       | 71.98               | 36.788588       | 121.907336       |
|                 | DR687 PsC 58       | 0                   | 36.788719       | 121.9029         |
| Tr2 south wall  | DR687 PsC 47       | 13.05               | 36.788624       | 121.902603       |
|                 | DR687 PsC 64       | 30.99               | 36.788799       | 121.902321       |
|                 | DR687 PsC 74       | 44.32               | 36.788723       | 121.901854       |
|                 | DR687 PsC 56       | 59.2                | 36.788789       | 121.901603       |
|                 | DR687 PsC 45       | 72.91               | 36.788781       | 121.901226       |
|                 | DR585 PsC 64       | 1.37                | 36.76513        | 121.969405       |
| Tr3 north wall  | DR585 PsC 79       | 7.74                | 36.765919       | 121.969977       |
|                 | DR585 PsC 74       | 21.91               | 36.766338       | 121.970698       |
|                 | DR586 PsC 56       | 35.07               | 36.767173       | 121.971071       |
|                 | DR586 PsC 67       | 56.76               | 36.767823       | 121.971461       |
|                 | DR586 PsC 60       | 74.93               | 36.768652       | 121.971543       |
|                 | DR685 PsC 49       | 0.01                | 36.764466       | 121.968944       |
| Tr3 south wall  | DR685 PsC 64       | 8.2                 | 36.764101       | 121.968603       |
|                 | DR680 PsC 47       | 11.68               | 36.764026       | 121.968444       |
|                 | DR680 PsC 64       | 28.96               | 36.763797       | 121.96822        |
|                 | DR685 PsC 77       | 49.44               | 36.763424       | 121.967913       |
|                 | DR685 PsC 51       | 70.26               | 36.763126       | 121.967586       |
|                 | DR685 PsC 80       | 78.38               | 36.762994       | 121.967471       |

|                |              |       |           |            |
|----------------|--------------|-------|-----------|------------|
| Tr4 north wall | DR589 PsC 77 | 2     | 36.781507 | 122.016136 |
|                | DR589 PsC 75 | 4.36  | 36.781083 | 122.016472 |
|                | DR589 PsC 71 | 15.51 | 36.780547 | 122.016652 |
|                | DR590 PsC 75 | 28.67 | 36.779837 | 122.017104 |
|                | DR590 PsC 51 | 36.59 | 36.779565 | 122.017242 |
|                | DR590 PsC 52 | 48.64 | 36.779321 | 122.017397 |
|                | DR590 PsC 62 | 64.44 | 36.77891  | 122.017268 |
| Tr5 south wall | DR591 PsC 47 | 9.83  | 36.734525 | 122.013342 |
|                | DR591 PsC 43 | 13.32 | 36.734721 | 122.013248 |
|                | DR591 PsC 75 | 0.41  | 36.734157 | 122.014367 |
|                | DR592 PsC 56 | 38.7  | 36.735102 | 122.012422 |
|                | DR592 PsC 44 | 53.58 | 36.735316 | 122.01206  |
|                | DR592 PsC 55 | 71.81 | 36.735545 | 122.01179  |
| Tr6 north wall | DR679 PsC 64 | 0     | 36.702313 | 122.02049  |
|                | DR679 PsC 79 | 5.33  | 36.702505 | 122.020895 |
|                | DR679 PsC 63 | 11.49 | 36.702728 | 122.021185 |
|                | DR679 PsC 76 | 21.37 | 36.703056 | 122.021483 |
|                | DR682 PsC 76 | 44.09 | 36.703305 | 122.021926 |
|                | DR682 PsC 46 | 58.08 | 36.703521 | 122.022221 |
|                | DR682 PsC 41 | 74.55 | 36.703783 | 122.022662 |



Table DR2: Detailed USGS mooring locations including water depth (Xu et al., 2004).

| <b>Mooring</b> | <b>Water depth</b> | <b>Latitude</b> | <b>Longitude</b> |
|----------------|--------------------|-----------------|------------------|
| R1             | 820                | 36.77167        | 121.9632         |
| R2             | 1020               | 36.78033        | 122.0135         |
| R3             | 1445               | 36.7195         | 122.0125         |

Table DR3: Characteristics of the four monitored turbidity currents (Xu et al., 2004; Xu 2010). Flow thicknesses were calculated from the ADCP velocity profiles (for methods see Xu, 2010).

| Turbidity Current | Date      | Source          | Trigger                                                                                                  | Mooring R1 |                                                                                  |                  |                         | Mooring R2 |               |                  |                                         | Mooring R3 |               |                  |                         |
|-------------------|-----------|-----------------|----------------------------------------------------------------------------------------------------------|------------|----------------------------------------------------------------------------------|------------------|-------------------------|------------|---------------|------------------|-----------------------------------------|------------|---------------|------------------|-------------------------|
|                   |           |                 |                                                                                                          | Thickness  |                                                                                  | Max speed (cm/s) | Max speed elevation (m) | Thickness  |               | Max speed (cm/s) | Max speed elevation (m)                 | Thickness  |               | Max speed (cm/s) | Max speed elevation (m) |
|                   |           |                 |                                                                                                          | Time (hr)  | Thickness (m)*                                                                   |                  |                         | Time (hr)  | Thickness (m) |                  |                                         | Time (hr)  | Thickness (m) |                  |                         |
| TC1               | 17-Dec-02 | Soquel canyon   | Storm activity that possibly caused failure of Soquel canyon wall or floor.                              |            |                                                                                  |                  |                         | 1          | 30.2          | 60               | 12.5                                    | 4          | 57.1          | 75               | 9.3                     |
|                   |           |                 |                                                                                                          |            | Not recorded at mooring as Soquel tributary intersects Monterey downstream of R1 |                  | 2                       | 24.2       |               | 5                | 50.2                                    |            |               |                  |                         |
|                   |           |                 |                                                                                                          |            |                                                                                  |                  | 3                       | 34.6       |               | 6                | 48.2                                    |            |               |                  |                         |
|                   |           |                 |                                                                                                          |            |                                                                                  |                  | 4                       | 39.7       |               | 7                | 54.7                                    |            |               |                  |                         |
|                   |           |                 |                                                                                                          |            |                                                                                  |                  | 5                       | 27.2       |               | 8                | 39.8                                    |            |               |                  |                         |
|                   |           |                 |                                                                                                          |            |                                                                                  |                  |                         |            | 9             | 26.7             |                                         |            |               |                  |                         |
| TC2               | 20-Dec-02 | Monterey Canyon | Storm activity transported large amounts of sediment to the canyon head which failed under wave loading. | 1          | 23.9                                                                             | 190              | 12.2                    | 1          | 37.5          | 160              | 10.5                                    | 2          | 31.1          | 180              | 5.3                     |
|                   |           |                 |                                                                                                          | 2          | 33                                                                               |                  | 2                       | 38.2       |               | 3                | 55.6                                    |            |               |                  |                         |
|                   |           |                 |                                                                                                          | 3          | 35.1                                                                             |                  | 3                       | 43.2       |               | 4                | 58.1                                    |            |               |                  |                         |
|                   |           |                 |                                                                                                          | 4          | 34.1                                                                             |                  | 4                       | 48.5       |               | 5                | 52.5                                    |            |               |                  |                         |
|                   |           |                 |                                                                                                          | 5          | 29.2                                                                             |                  | 5                       | 51.3       |               | 6                | 55.1                                    |            |               |                  |                         |
|                   |           |                 |                                                                                                          | 6          | 28.2                                                                             |                  | 6                       | 33.1       |               | 7                | 53.5                                    |            |               |                  |                         |
|                   |           |                 |                                                                                                          | 7          | 51.4                                                                             |                  |                         |            |               | 8                | 53.5                                    |            |               |                  |                         |
|                   |           |                 |                                                                                                          | 8          | 55.5                                                                             |                  |                         |            |               | 9                | 37                                      |            |               |                  |                         |
|                   |           |                 |                                                                                                          |            |                                                                                  |                  |                         |            |               | 10               | 25.8                                    |            |               |                  |                         |
| TC3               | 14-Mar-03 | Monterey Canyon | Anthropogenic. Dredged material dumped at the head of Monterey Canyon                                    | 1          | 32.4                                                                             | 160              | 12.2                    | 2          | 32.2          | 105              | 8.5                                     |            |               |                  |                         |
|                   |           |                 |                                                                                                          | 2          | 33.6                                                                             |                  | 3                       | 32.3       |               |                  |                                         |            |               |                  |                         |
|                   |           |                 |                                                                                                          | 3          | 39.9                                                                             |                  | 4                       | 42.5       |               |                  | Turbidity current did not reach mooring |            |               |                  |                         |
|                   |           |                 |                                                                                                          | 4          | 38.2                                                                             |                  | 5                       | 45.9       |               |                  |                                         |            |               |                  |                         |
|                   |           |                 |                                                                                                          | 5          | 45.6                                                                             |                  | 6                       | 47.7       |               |                  |                                         |            |               |                  |                         |
|                   |           |                 |                                                                                                          | 6          | 53.7                                                                             |                  |                         |            |               |                  |                                         |            |               |                  |                         |
| TC4               | 19-Nov-03 | Monterey Canyon | Unknown                                                                                                  |            |                                                                                  |                  |                         | 1          | 41.8          | 155              | 10.5                                    | 3          | 46.3          | 110              | 7.3                     |
|                   |           |                 |                                                                                                          |            |                                                                                  |                  |                         | 2          | 46.5          |                  | 4                                       | 56         |               |                  |                         |
|                   |           |                 |                                                                                                          |            |                                                                                  |                  |                         | 3          | 49.7          |                  | 5                                       | 58         |               |                  |                         |
|                   |           |                 |                                                                                                          |            | Turbidity current broke mooring                                                  |                  |                         | 4          | 51.9          |                  | 6                                       | 58.5       |               |                  |                         |
|                   |           |                 |                                                                                                          |            |                                                                                  |                  |                         |            | 5             | 52.4             |                                         |            |               |                  |                         |
|                   |           |                 |                                                                                                          |            |                                                                                  |                  |                         | 6          | 52.9          |                  |                                         |            |               |                  |                         |
|                   |           |                 |                                                                                                          |            |                                                                                  |                  |                         | 7          | 49.3          |                  |                                         |            |               |                  |                         |
|                   |           |                 |                                                                                                          |            |                                                                                  |                  |                         |            |               |                  |                                         |            |               |                  |                         |
